# Supplementary material for: Identification of potential molecular pathways involved in prostate carcinogenesis in offspring exposed to maternal malnutrition
Source: Aging (Albany NY). 2020 Oct 13;12(20):19954–78. doi: 10.18632/aging.104093 (PMC7655221; doi:10.18632/aging.104093)
Supplement: Supplementary File 1 [file aging-12-104093-s003..xlsx]

## Sheet: PND 21 GLLPxCTR
Accession	OK	Description	Unique	GLLP:CTR_Ratio	GLLP:CTR__P
P62963	1	Profilin-1 OS=Rattus norvegicus GN=Pfn1 PE=1 SV=2		0.463013	0
P02091	2	Hemoglobin subunit beta-1 OS=Rattus norvegicus GN=Hbb PE=1 SV=3		0.532592	0
A0A0G2JSW3	2	Globin a4 OS=Rattus norvegicus GN=Hbb PE=1 SV=1		0.537944	0
P01946	2	Hemoglobin subunit alpha-1/2 OS=Rattus norvegicus GN=Hba1 PE=1 SV=3		0.548812	0
A0A0G2JSV6	2	Globin c2 OS=Rattus norvegicus GN=Hba-a2 PE=1 SV=1		0.548812	0
O88752	2	Epsilon 1 globin OS=Rattus norvegicus GN=Hbe1 PE=1 SV=1		0.571209	0
P11517	2	Hemoglobin subunit beta-2 OS=Rattus norvegicus PE=1 SV=2		0.57695	0
P60711	2	Actin_ cytoplasmic 1 OS=Rattus norvegicus GN=Actb PE=1 SV=1		0.878095	0
P63259	2	Actin_ cytoplasmic 2 OS=Rattus norvegicus GN=Actg1 PE=1 SV=1		0.895834	0
A0A0G2K3K2	2	Actin_ cytoplasmic 1 OS=Rattus norvegicus GN=Actb PE=1 SV=1		0.895834	0
P62804	2	Histone H4 OS=Rattus norvegicus GN=Hist1h4b PE=1 SV=2		0.794534	0.01
D3ZVQ8	1	Glutathione S-transferase_ mu 6-like OS=Rattus norvegicus GN=Gstm6 PE=4 SV=3		0.88692	0.11
F1LXL7	1	Glutathione S-transferase_ mu 6-like OS=Rattus norvegicus GN=Gstm6l PE=4 SV=3		0.904837	0.2
Q9Z1B2	1	Glutathione S-transferase Mu 5 OS=Rattus norvegicus GN=Gstm5 PE=1 SV=3		0.904837	0.21
P63269	2	Actin_ gamma-enteric smooth muscle OS=Rattus norvegicus GN=Actg2 PE=2 SV=1		0.980199	0.22
P09812	2	Glycogen phosphorylase_ muscle form OS=Rattus norvegicus GN=Pygm PE=1 SV=5		0.99005	0.24
A0A0G2K6L4	1	Glutathione S-transferase_ mu 6 (Predicted)_ isoform CRA_a OS=Rattus norvegicus GN=Gstm6l PE=1 SV=1		0.941765	0.28
P68370	1	Tubulin alpha-1A chain OS=Rattus norvegicus GN=Tuba1a PE=1 SV=1		0.970446	0.28
B4F7C2	1	Tubulin beta chain OS=Rattus norvegicus GN=Tubb4a PE=1 SV=1		0.951229	0.29
Q6P9V9	1	Tubulin alpha-1B chain OS=Rattus norvegicus GN=Tuba1b PE=1 SV=1		0.970446	0.31
P63102	1	14-3-3 protein zeta/delta OS=Rattus norvegicus GN=Ywhaz PE=1 SV=1		0.923116	0.33
A0A0G2JV65	1	14-3-3 protein zeta/delta OS=Rattus norvegicus GN=Ywhaz PE=1 SV=1		0.932394	0.36
A0A0H2UHM7	1	Tubulin alpha chain OS=Rattus norvegicus GN=LOC100909441 PE=3 SV=1		0.960789	0.36
G3V8V3	2	Alpha-1_4 glucan phosphorylase OS=Rattus norvegicus GN=Pygm PE=1 SV=1		0.99005	0.36
Q63910	2	Alpha globin OS=Rattus norvegicus GN=Hba-a3 PE=1 SV=2		0.923116	0.37
A0A0G2JZ09	1	Glutathione S-transferase_ mu 6-like OS=Rattus norvegicus GN=Gstm6l PE=1 SV=1		0.960789	0.37
G3V8R3	2	Globin e1 OS=Rattus norvegicus GN=Hbz PE=3 SV=1		0.913931	0.46
Q6AYZ1	1	Tubulin alpha-1C chain OS=Rattus norvegicus GN=Tuba1c PE=1 SV=1		0.99005	0.46
A0A0G2K4M6	2	Actin_ aortic smooth muscle OS=Rattus norvegicus GN=Acta2 PE=3 SV=1		1	0.46
E9PTN6	1	Glyceraldehyde-3-phosphate dehydrogenase OS=Rattus norvegicus PE=3 SV=1		0.99005	0.47
G3V6Y6	2	Alpha-1_4 glucan phosphorylase OS=Rattus norvegicus GN=Pygb PE=1 SV=2		1	0.47
P53534	2	Glycogen phosphorylase_ brain form (Fragment) OS=Rattus norvegicus GN=Pygb PE=1 SV=3		1	0.47
P68136	2	Actin_ alpha skeletal muscle OS=Rattus norvegicus GN=Acta1 PE=1 SV=1		1	0.49
Q64122	1	Myosin regulatory light polypeptide 9 OS=Rattus norvegicus GN=Myl9 PE=1 SV=2		0.923116	0.5
D3ZHA7	1	Similar to Myosin light chain 1 slow a (Predicted) OS=Rattus norvegicus GN=RGD1560334_predicted PE=4 SV=1		0.99005	0.51
A0A0G2JSW0	1	Myosin regulatory light chain 12B OS=Rattus norvegicus GN=Myl12b PE=4 SV=1		1.06184	0.51
P18666	1	Myosin regulatory light chain 12B OS=Rattus norvegicus GN=Myl12b PE=1 SV=3		0.980199	0.52
A0A0G2K7M1	1	Glyceraldehyde-3-phosphate dehydrogenase OS=Rattus norvegicus PE=1 SV=1		1.0202	0.52
Q562C9	2	1_2-dihydroxy-3-keto-5-methylthiopentene dioxygenase OS=Rattus norvegicus GN=Adi1 PE=2 SV=1		1	0.53
B0BMS8	1	Myl9 protein OS=Rattus norvegicus GN=Myl9 PE=1 SV=1		0.99005	0.55
P62738	2	Actin_ aortic smooth muscle OS=Rattus norvegicus GN=Acta2 PE=2 SV=1		1.01005	0.56
D3ZQT0	1	Uncharacterized protein OS=Rattus norvegicus PE=1 SV=1		1.04081	0.56
P68035	2	Actin_ alpha cardiac muscle 1 OS=Rattus norvegicus GN=Actc1 PE=2 SV=1		1	0.57
P13832	1	Myosin regulatory light chain RLC-A OS=Rattus norvegicus GN=Rlc-a PE=2 SV=2		1.06184	0.6
P69897	1	Tubulin beta-5 chain OS=Rattus norvegicus GN=Tubb5 PE=1 SV=1		1.0202	0.62
Q6P9T8	1	Tubulin beta-4B chain OS=Rattus norvegicus GN=Tubb4b PE=1 SV=1		1.03045	0.64
Q64119	2	Myosin light polypeptide 6 OS=Rattus norvegicus GN=Myl6 PE=1 SV=3		1.03045	0.64
A0A0G2K6J5	2	Myosin light polypeptide 6 OS=Rattus norvegicus GN=Myl6 PE=1 SV=1		1.04081	0.65
B2GV99	2	Myl6 protein OS=Rattus norvegicus GN=Myl6 PE=2 SV=1		1.04081	0.68
A0A0G2JWE1	2	Myosin light polypeptide 6 OS=Rattus norvegicus GN=Myl6 PE=4 SV=1		1.05127	0.7
P85108	1	Tubulin beta-2A chain OS=Rattus norvegicus GN=Tubb2a PE=1 SV=1		1.05127	0.74
P00330	1	Alcohol dehydrogenase 1 OS=Saccharomyces cerevisiae (strain ATCC 204508 / S288c) GN=ADH1 PE=1 SV=5		1.05127	0.74
G3V7C6	1	Tubulin beta chain OS=Rattus norvegicus GN=Tubb4b PE=1 SV=2		1.05127	0.76
Q4QQV0	1	Tubulin beta chain OS=Rattus norvegicus GN=Tubb6 PE=1 SV=1		1.08329	0.77
D3ZWE0	2	Histone H2A OS=Rattus norvegicus GN=Hist2h2ab PE=3 SV=1		1.05127	0.78
P09811	2	Glycogen phosphorylase_ liver form OS=Rattus norvegicus GN=Pygl PE=1 SV=5		1.0202	0.79
Q3KRE8	1	Tubulin beta-2B chain OS=Rattus norvegicus GN=Tubb2b PE=1 SV=1		1.06184	0.79
D3ZRN3	2	Actin_ beta-like 2 OS=Rattus norvegicus GN=Actbl2 PE=1 SV=1		1.03045	0.81
Q4QRB4	1	Tubulin beta-3 chain OS=Rattus norvegicus GN=Tubb3 PE=1 SV=1		1.07251	0.81
P38983	1	40S ribosomal protein SA OS=Rattus norvegicus GN=Rpsa PE=1 SV=3		1.16183	0.81
P63012	1	Ras-related protein Rab-3A OS=Rattus norvegicus GN=Rab3a PE=1 SV=1		1.1853	0.83
D4A0G7	1	RAB37_ member RAS oncogene family OS=Rattus norvegicus GN=Rab37 PE=4 SV=1		1.2214	0.83
P36374	2	Prostatic glandular kallikrein-6 OS=Rattus norvegicus GN=Klk6 PE=3 SV=1		1.10517	0.84
P35284	1	Ras-related protein Rab-12 OS=Rattus norvegicus GN=Rab12 PE=1 SV=2		1.1853	0.85
P05714	1	Ras-related protein Rab-4A OS=Rattus norvegicus GN=Rab4a PE=1 SV=3		1.20925	0.85
A0A0G2K201	1	RAB42_ member RAS oncogene family OS=Rattus norvegicus GN=Rab42 PE=4 SV=1		1.2214	0.85
A0A0G2JTT4	1	RAB30_ member RAS oncogene family OS=Rattus norvegicus GN=Rab30 PE=1 SV=1		1.19722	0.86
P51156	1	Ras-related protein Rab-26 OS=Rattus norvegicus GN=Rab26 PE=2 SV=2		1.2214	0.86
P36373	2	Glandular kallikrein-7_ submandibular/renal OS=Rattus norvegicus GN=Klk7 PE=1 SV=1		1.11628	0.87
M0RDZ8	2	Prostatic glandular kallikrein-6-like OS=Rattus norvegicus GN=LOC103690048 PE=3 SV=1		1.1275	0.87
G3V8H1	2	Kallikrein 1 OS=Rattus norvegicus GN=Klk1 PE=3 SV=1		1.13883	0.87
Q9WVB1	1	Ras-related protein Rab-6A OS=Rattus norvegicus GN=Rab6a PE=1 SV=2		1.19722	0.87
D3ZZP2	1	RAB39_ member RAS oncogene family (Predicted) OS=Rattus norvegicus GN=Rab39a PE=4 SV=1		1.23368	0.87
F1LNH4	2	Kallikrein 1-related peptidase C12 OS=Rattus norvegicus GN=Klk1c12 PE=3 SV=1		1.11628	0.88
Q63941	1	Ras-related protein Rab-3B OS=Rattus norvegicus GN=Rab3b PE=1 SV=2		1.20925	0.88
P35286	1	Ras-related protein Rab-13 OS=Rattus norvegicus GN=Rab13 PE=1 SV=2		1.20925	0.88
D4A315	1	Uncharacterized protein OS=Rattus norvegicus PE=3 SV=2		1.29693	0.88
A0A0G2JVI3	1	Uncharacterized protein OS=Rattus norvegicus PE=3 SV=1		1.09417	0.89
W4VSR8	2	Kallikrein 1-related peptidase C6 OS=Rattus norvegicus GN=Klk1c6 PE=3 SV=2		1.13883	0.89
A0A0G2K8S2	1	Uncharacterized protein OS=Rattus norvegicus GN=RGD1564958 PE=1 SV=1		1.15027	0.89
P84082	1	ADP-ribosylation factor 2 OS=Rattus norvegicus GN=Arf2 PE=2 SV=1		1.17351	0.89
A0A0G2JT78	1	RAB6B_ member RAS oncogene family OS=Rattus norvegicus GN=Rab6b PE=4 SV=1		1.2586	0.89
Q7M0E3	1	Destrin OS=Rattus norvegicus GN=Dstn PE=1 SV=3		1.29693	0.89
A0A0G2K797	2	Kallikrein 1-related peptidase C6 OS=Rattus norvegicus GN=Klk1c6 PE=3 SV=1		1.1275	0.9
P36376	2	Glandular kallikrein-12_ submandibular/renal OS=Rattus norvegicus GN=Klk12 PE=2 SV=1		1.1275	0.9
G3V8G8	2	Kallikrein 1-related peptidase C8 OS=Rattus norvegicus GN=Klk1c8 PE=3 SV=1		1.1275	0.9
D4A376	1	Ras-related protein Rab-12 OS=Rattus norvegicus GN=Rab12 PE=1 SV=3		1.1853	0.9
P62824	1	Ras-related protein Rab-3C OS=Rattus norvegicus GN=Rab3c PE=1 SV=1		1.24608	0.9
B0BMW0	1	RAB14_ member RAS oncogene family OS=Rattus norvegicus GN=Rab14 PE=1 SV=1		1.2586	0.9
A0A0G2JX19	2	Uncharacterized protein OS=Rattus norvegicus PE=3 SV=1		1.1275	0.91
F1LZI1	1	Similar to heat shock protein 8 OS=Rattus norvegicus GN=LOC680121 PE=3 SV=2		1.16183	0.91
P61206	1	ADP-ribosylation factor 3 OS=Rattus norvegicus GN=Arf3 PE=2 SV=2		1.19722	0.91
A0A0G2JV81	1	ADP-ribosylation factor 3 OS=Rattus norvegicus GN=Arf3 PE=3 SV=1		1.19722	0.91
A0A1B0GWR3	1	Ras-related protein Rab-14 (Fragment) OS=Rattus norvegicus GN=Rab14 PE=1 SV=1		1.23368	0.91
F1LW77	1	RAB33B_ member RAS oncogene family OS=Rattus norvegicus GN=Rab33b PE=1 SV=2		1.23368	0.91
P61107	1	Ras-related protein Rab-14 OS=Rattus norvegicus GN=Rab14 PE=1 SV=3		1.23368	0.91
P62632	2	Elongation factor 1-alpha 2 OS=Rattus norvegicus GN=Eef1a2 PE=1 SV=1		1.09417	0.92
P84079	1	ADP-ribosylation factor 1 OS=Rattus norvegicus GN=Arf1 PE=1 SV=2		1.15027	0.92
P51146	1	Ras-related protein Rab-4B OS=Rattus norvegicus GN=Rab4b PE=2 SV=1		1.23368	0.92
Q53B90	1	Ras-related protein Rab-43 OS=Rattus norvegicus GN=Rab43 PE=2 SV=1		1.24608	0.92
F1LVC3	1	RAB6B_ member RAS oncogene family OS=Rattus norvegicus GN=Rab6b PE=4 SV=2		1.24608	0.92
D3ZME3	1	Uncharacterized protein OS=Rattus norvegicus PE=1 SV=1		1.2586	0.92
P35704	1	Peroxiredoxin-2 OS=Rattus norvegicus GN=Prdx2 PE=1 SV=3		1.43333	0.92
A0A0G2K6G1	2	Kallikrein 1 OS=Rattus norvegicus GN=Klk1c9 PE=3 SV=1		1.13883	0.93
Q63942	1	GTP-binding protein Rab-3D OS=Rattus norvegicus GN=Rab3d PE=1 SV=2		1.27125	0.93
P36375	2	Glandular kallikrein-10 OS=Rattus norvegicus GN=Klk10 PE=1 SV=2		1.15027	0.94
A0A0H2UHP9	1	RCG39700_ isoform CRA_d OS=Rattus norvegicus GN=Rab6a PE=1 SV=1		1.2586	0.94
A0A0G2JYY8	1	Uncharacterized protein OS=Rattus norvegicus PE=1 SV=1		1.27125	0.94
G3V8H3	1	Glutathione S-transferase OS=Rattus norvegicus GN=Gstm3 PE=3 SV=1		1.97388	0.94
P84083	1	ADP-ribosylation factor 5 OS=Rattus norvegicus GN=Arf5 PE=1 SV=2		1.1853	0.95
P61751	1	ADP-ribosylation factor 4 OS=Rattus norvegicus GN=Arf4 PE=2 SV=2		1.1853	0.95
A0A0G2K9H8	1	ADP-ribosylation factor 3 OS=Rattus norvegicus GN=Arf3 PE=3 SV=1		1.19722	0.95
A0A0G2K4Q4	1	ADP-ribosylation factor 3 OS=Rattus norvegicus GN=Arf3 PE=3 SV=1		1.20925	0.95
P70550	1	Ras-related protein Rab-8B OS=Rattus norvegicus GN=Rab8b PE=1 SV=1		1.20925	0.95
G3V6H0	1	RAB1B_ member RAS oncogene family-like OS=Rattus norvegicus GN=LOC100363782 PE=4 SV=1		1.20925	0.95
P47727	2	Carbonyl reductase [NADPH] 1 OS=Rattus norvegicus GN=Cbr1 PE=1 SV=2		1.2214	0.95
A0A0G2JSH9	1	Peroxiredoxin-2 OS=Rattus norvegicus GN=Prdx2 PE=1 SV=1		1.41907	0.95
P35289	1	Ras-related protein Rab-15 OS=Rattus norvegicus GN=Rab15 PE=2 SV=1		1.20925	0.96
E9PU16	1	RAB1A_ member RAS oncogene family OS=Rattus norvegicus GN=Rab1a PE=1 SV=2		1.2214	0.96
Q5U316	1	Ras-related protein Rab-35 OS=Rattus norvegicus GN=Rab35 PE=1 SV=1		1.2214	0.96
P35280	1	Ras-related protein Rab-8A OS=Rattus norvegicus GN=Rab8a PE=1 SV=2		1.23368	0.96
P10536	1	Ras-related protein Rab-1B OS=Rattus norvegicus GN=Rab1b PE=1 SV=1		1.2214	0.97
P35281	1	Ras-related protein Rab-10 OS=Rattus norvegicus GN=Rab10 PE=1 SV=1		1.2214	0.97
Q5RKJ9	1	RAB10_ member RAS oncogene family OS=Rattus norvegicus GN=Rab10 PE=1 SV=1		1.23368	0.97
P31232	2	Transgelin OS=Rattus norvegicus GN=Tagln PE=1 SV=2		1.23368	0.97
Q6NYB7	1	Ras-related protein Rab-1A OS=Rattus norvegicus GN=Rab1A PE=1 SV=3		1.24608	0.97
A0A0A0MXW3	2	Histone H2A OS=Rattus norvegicus GN=H2afz PE=3 SV=1		1.17351	0.98
D4AEC0	2	Histone H2A OS=Rattus norvegicus GN=H2afv PE=3 SV=1		1.1853	0.98
Q5BK56	1	Glutathione S-transferase OS=Rattus norvegicus GN=Gstm4 PE=1 SV=1		1.2214	0.98
M0R3X6	2	Carbonyl reductase [NADPH] 1 OS=Rattus norvegicus GN=Cbr1 PE=1 SV=1		1.24608	0.98
A0A0G2K658	2	Carbonyl reductase [NADPH] 1 OS=Rattus norvegicus GN=LOC102556347 PE=1 SV=1		1.24608	0.98
B5DEI2	1	Amine oxidase OS=Rattus norvegicus GN=Lao1 PE=2 SV=1		1.15027	0.99
P10719	1	ATP synthase subunit beta_ mitochondrial OS=Rattus norvegicus GN=Atp5b PE=1 SV=2		1.16183	0.99
P0C0S7	2	Histone H2A.Z OS=Rattus norvegicus GN=H2afz PE=1 SV=2		1.17351	0.99
P08009	1	Glutathione S-transferase Yb-3 OS=Rattus norvegicus GN=Gstm3 PE=1 SV=2		1.19722	0.99
P63018	2	Heat shock cognate 71 kDa protein OS=Rattus norvegicus GN=Hspa8 PE=1 SV=1		1.19722	0.99
A0A096MJ24	2	Carbonyl reductase [NADPH] 1 OS=Rattus norvegicus GN=Cbr1 PE=1 SV=1		1.20925	0.99
P14659	2	Heat shock-related 70 kDa protein 2 OS=Rattus norvegicus GN=Hspa2 PE=1 SV=2		1.20925	0.99
A0A0G2JWK7	2	Transgelin OS=Rattus norvegicus GN=Tagln PE=1 SV=1		1.2214	0.99
A0A0G2K2E4	1	Peptidyl-prolyl cis-trans isomerase OS=Rattus norvegicus GN=LOC100911252 PE=3 SV=1		1.23368	0.99
A0A0G2K235	1	RAB1A_ member RAS oncogene family OS=Rattus norvegicus GN=Rab1a PE=1 SV=1		1.23368	0.99
A0A0G2JSV2	2	Carbonyl reductase [NADPH] 1 OS=Rattus norvegicus GN=Cbr1 PE=1 SV=1		1.23368	0.99
G3V6D3	1	ATP synthase subunit beta OS=Rattus norvegicus GN=Atp5b PE=1 SV=1		1.16183	1
D3ZXP3	2	Histone H2A OS=Rattus norvegicus GN=H2afx PE=1 SV=1		1.17351	1
M0RCB1	2	Uncharacterized protein OS=Rattus norvegicus PE=3 SV=1		1.1853	1
D4A4S3	2	Heat shock cognate 71 kDa protein OS=Rattus norvegicus GN=Hspa8 PE=3 SV=3		1.1853	1
A0A0G2K7Y9	2	Spermine-binding protein-like OS=Rattus norvegicus GN=Sbpl PE=4 SV=1		1.23368	1
A0A0G2JZ90	2	Spermine-binding protein-like OS=Rattus norvegicus GN=Sbpl PE=4 SV=1		1.23368	1
A0A0G2JUT0	2	Heat shock-related 70 kDa protein 2 OS=Rattus norvegicus GN=Hspa2 PE=1 SV=1		1.23368	1
A0A0G2K176	2	Prostatic spermine-binding protein OS=Rattus norvegicus GN=Sbp PE=4 SV=1		1.23368	1
F1M6C2	2	Elongation factor 1-alpha 1 pseudogene OS=Rattus norvegicus GN=LOC103691939 PE=1 SV=1		1.24608	1
P08723	2	Prostatic spermine-binding protein OS=Rattus norvegicus GN=Sbp PE=1 SV=1		1.24608	1
A0A0G2K4C9	2	Prostatic spermine-binding protein OS=Rattus norvegicus GN=Sbp PE=4 SV=1		1.24608	1
A0A0G2JTU6	2	Prostatic spermine-binding protein OS=Rattus norvegicus GN=Sbp PE=4 SV=1		1.24608	1
B2GV72	2	Carbonyl reductase 3 OS=Rattus norvegicus GN=Cbr3 PE=1 SV=1		1.28403	1
M0R8M9	2	Heat shock cognate 71 kDa protein OS=Rattus norvegicus GN=Hspa8 PE=3 SV=2		1.28403	1
M0RBQ5	2	Histone H2B OS=Rattus norvegicus GN=Hist3h2bb PE=3 SV=1		1.29693	1
D3ZNZ9	2	Histone H2B OS=Rattus norvegicus GN=Hist3h2ba PE=3 SV=1		1.29693	1
M0R4L7	2	Histone H2B OS=Rattus norvegicus GN=Hist1h2bl PE=3 SV=1		1.29693	1
A0A0G2JXI9	2	Histone H2B OS=Rattus norvegicus GN=Hist1h2bo PE=3 SV=1		1.30996	1
G3V8B3	2	Histone H2B OS=Rattus norvegicus GN=Hist1h2bq PE=3 SV=1		1.30996	1
A0A0G2JXE0	2	Histone H2B OS=Rattus norvegicus GN=LOC102549061 PE=3 SV=1		1.30996	1
D4A817	2	Histone H2B OS=Rattus norvegicus GN=Hist2h2be PE=3 SV=3		1.30996	1
G3V9C7	2	Histone H2B OS=Rattus norvegicus GN=Hist1h2bk PE=3 SV=1		1.30996	1
D3ZWM5	2	Histone H2B OS=Rattus norvegicus GN=Hist1h2bd PE=3 SV=2		1.30996	1
P08010	1	Glutathione S-transferase Mu 2 OS=Rattus norvegicus GN=Gstm2 PE=1 SV=2		1.32313	1
A0A0G2K4U2	1	Glutathione S-transferase Mu 2 OS=Rattus norvegicus GN=Gstm7 PE=1 SV=1		1.32313	1
Q00715	2	Histone H2B type 1 OS=Rattus norvegicus PE=1 SV=2		1.32313	1
D3ZLY9	2	Histone H2B OS=Rattus norvegicus GN=Hist1h2bh PE=3 SV=2		1.32313	1
P62630	2	Elongation factor 1-alpha 1 OS=Rattus norvegicus GN=Eef1a1 PE=2 SV=1		1.32313	1
D3ZNH4	2	Histone H2B OS=Rattus norvegicus GN=Hist1h2bo PE=3 SV=1		1.32313	1
M0R757	2	Elongation factor 1-alpha OS=Rattus norvegicus GN=LOC100360413 PE=3 SV=1		1.32313	1
P55063	2	Heat shock 70 kDa protein 1-like OS=Rattus norvegicus GN=Hspa1l PE=2 SV=2		1.39097	1
P0DMW1	2	Heat shock 70 kDa protein 1B OS=Rattus norvegicus GN=Hspa1b PE=2 SV=1		1.39097	1
E9PTV9	1	Glyceraldehyde-3-phosphate dehydrogenase OS=Rattus norvegicus GN=RGD1562758 PE=1 SV=2		1.41907	1
P0DMW0	2	Heat shock 70 kDa protein 1A OS=Rattus norvegicus GN=Hspa1a PE=2 SV=1		1.41907	1
A0A0G2JSS8	1	Peroxiredoxin 5_ isoform CRA_c OS=Rattus norvegicus GN=Prdx5 PE=1 SV=1		1.43333	1
Q9R063	1	Peroxiredoxin-5_ mitochondrial OS=Rattus norvegicus GN=Prdx5 PE=1 SV=1		1.43333	1
P11598	2	Protein disulfide-isomerase A3 OS=Rattus norvegicus GN=Pdia3 PE=1 SV=2		1.43333	1
A0A0H2UHM5	2	Protein disulfide-isomerase OS=Rattus norvegicus GN=Pdia3 PE=1 SV=1		1.43333	1
P10111	1	Peptidyl-prolyl cis-trans isomerase A OS=Rattus norvegicus GN=Ppia PE=1 SV=2		1.52196	1
A0A0G2K1P0	1	Peptidyl-prolyl cis-trans isomerase OS=Rattus norvegicus GN=Ppia PE=1 SV=1		1.52196	1
P07647	2	Submandibular glandular kallikrein-9 OS=Rattus norvegicus GN=Klk9 PE=1 SV=1		1.52196	1
P06761	2	78 kDa glucose-regulated protein OS=Rattus norvegicus GN=Hspa5 PE=1 SV=1		1.53726	1
A0A0G2JX00	2	Kallikrein 1 OS=Rattus norvegicus GN=Klk1c9 PE=3 SV=1		1.53726	1
A0A0G2K7R1	2	Uncharacterized protein OS=Rattus norvegicus PE=3 SV=1		1.53726	1
P0CG51	1	Polyubiquitin-B OS=Rattus norvegicus GN=Ubb PE=1 SV=1		1.55271	1
F1LML2	1	Polyubiquitin-C OS=Rattus norvegicus GN=Ubc PE=4 SV=1		1.55271	1
P62986	1	Ubiquitin-60S ribosomal protein L40 OS=Rattus norvegicus GN=Uba52 PE=1 SV=2		1.55271	1
Q63429	1	Polyubiquitin-C OS=Rattus norvegicus GN=Ubc PE=1 SV=1		1.56831	1
P62982	1	Ubiquitin-40S ribosomal protein S27a OS=Rattus norvegicus GN=Rps27a PE=1 SV=2		1.58407	1
D3Z9U8	2	Similar to S100 calcium-binding protein_ ventral prostate OS=Rattus norvegicus GN=RGD1562234 PE=4 SV=1		1.58407	1
F1LU69	1	Ubiquitin B pseudogene 4 OS=Rattus norvegicus GN=Ubbp4 PE=4 SV=3		1.63232	1
P02770	2	Serum albumin OS=Rattus norvegicus GN=Alb PE=1 SV=2		1.64872	1
A0A0G2JSH5	2	Serum albumin OS=Rattus norvegicus GN=Alb PE=1 SV=1		1.66529	1
Q6I8Q6	2	Histone H2A OS=Rattus norvegicus GN=Hist1h2af PE=3 SV=1		1.68203	1
Q64598	2	Histone H2A type 1-F OS=Rattus norvegicus PE=3 SV=3		1.69893	1
D3ZVK7	2	Histone H2A OS=Rattus norvegicus GN=Hist1h2ak PE=3 SV=1		1.71601	1
Q63081	1	Protein disulfide-isomerase A6 OS=Rattus norvegicus GN=Pdia6 PE=1 SV=2		1.73325	1
A0A0G2JSZ5	1	Protein disulfide-isomerase A6 OS=Rattus norvegicus GN=Pdia6 PE=1 SV=1		1.73325	1
D3ZGY4	1	Glyceraldehyde-3-phosphate dehydrogenase OS=Rattus norvegicus GN=Gapdh-ps2 PE=1 SV=1		1.75067	1
P04785	1	Protein disulfide-isomerase OS=Rattus norvegicus GN=P4hb PE=1 SV=2		1.75067	1
M0R590	1	Glyceraldehyde-3-phosphate dehydrogenase OS=Rattus norvegicus GN=LOC108351137 PE=3 SV=1		1.76827	1
M0R660	1	Glyceraldehyde-3-phosphate dehydrogenase OS=Rattus norvegicus PE=1 SV=1		1.78604	1
Q00728	2	Histone H2A type 4 OS=Rattus norvegicus PE=2 SV=2		1.78604	1
G3V9C0	2	Histone H2A OS=Rattus norvegicus GN=Hist1h2ac PE=3 SV=1		1.78604	1
P04797	1	Glyceraldehyde-3-phosphate dehydrogenase OS=Rattus norvegicus GN=Gapdh PE=1 SV=3		1.80399	1
P0CC09	2	Histone H2A type 2-A OS=Rattus norvegicus GN=Hist2h2aa3 PE=1 SV=1		1.80399	1
P02780	2	Secretoglobin family 2A member 2 OS=Rattus norvegicus GN=Scgb2a2 PE=1 SV=1		1.82212	1
D4ACV3	2	Histone H2A OS=Rattus norvegicus GN=Hist2h2ac PE=3 SV=2		1.84043	1
M0RDM4	2	Histone H2A OS=Rattus norvegicus GN=LOC680322 PE=3 SV=1		1.85893	1
M0RCL5	2	Histone H2A OS=Rattus norvegicus GN=LOC100910554 PE=1 SV=1		1.85893	1
A9UMV8	2	Histone H2A.J OS=Rattus norvegicus GN=H2afj PE=2 SV=1		1.89648	1
P0C170	2	Histone H2A type 1-E OS=Rattus norvegicus PE=1 SV=2		1.89648	1
P0C169	2	Histone H2A type 1-C OS=Rattus norvegicus PE=1 SV=2		1.89648	1
P02262	2	Histone H2A type 1 OS=Rattus norvegicus PE=1 SV=2		1.93479	1
Q4FZT6	2	Histone H2A type 3 OS=Rattus norvegicus PE=2 SV=3		1.95424	1
P18418	2	Calreticulin OS=Rattus norvegicus GN=Calr PE=1 SV=1		2.18147	1
A0A0H2UHR8	2	Prostatic steroid-binding protein C2 OS=Rattus norvegicus GN=Psbpc2 PE=4 SV=1		2.36316	1
P02781	2	Prostatic steroid-binding protein C2 OS=Rattus norvegicus GN=Psbpc2 PE=1 SV=1		2.4596	1
M0R6X5	2	Histone H2A OS=Rattus norvegicus PE=3 SV=2		2.4596	1
P02782	2	Prostatic steroid-binding protein C1 OS=Rattus norvegicus GN=Psbpc1 PE=1 SV=1		3.03436	1
P22283	1	Cystatin-related protein 2 OS=Rattus norvegicus GN=Crp2 PE=2 SV=1		3.78104	1
Z4YNX7	1	Cystatin OS=Rattus norvegicus GN=P22k15 PE=3 SV=2		3.78104	1
P35213	1	14-3-3 protein beta/alpha OS=Rattus norvegicus GN=Ywhab PE=1 SV=3	CTR	CTR	CTR
A0A0G2K2B8	1	14-3-3 protein eta OS=Rattus norvegicus GN=Ywhah PE=1 SV=1	CTR	CTR	CTR
P61983	1	14-3-3 protein gamma OS=Rattus norvegicus GN=Ywhag PE=1 SV=2	CTR	CTR	CTR
P68255	1	14-3-3 protein theta OS=Rattus norvegicus GN=Ywhaq PE=1 SV=1	CTR	CTR	CTR
D3ZYM6	1	Calreticulin 4 OS=Rattus norvegicus GN=Calr4 PE=1 SV=2	CTR	CTR	CTR
P68511	1	14-3-3 protein eta OS=Rattus norvegicus GN=Ywhah PE=1 SV=2	CTR	CTR	CTR
Q5EBB0	1	Similar to 14-3-3 protein sigma OS=Rattus norvegicus GN=LOC298795 PE=2 SV=1	CTR	CTR	CTR
F1M5A1	1	Calreticulin 4 OS=Rattus norvegicus GN=Calr4 PE=1 SV=2	CTR	CTR	CTR
G3V9A3	1	RCG31390 OS=Rattus norvegicus GN=Sfn PE=3 SV=1	CTR	CTR	CTR
A0A0G2K890	1	Ezrin OS=Rattus norvegicus GN=Ezr PE=1 SV=1	GLLP	GLLP	GLLP
P0DP31	1	Calmodulin-3 OS=Rattus norvegicus GN=Calm3 PE=1 SV=1	GLLP	GLLP	GLLP
P0DP30	1	Calmodulin-2 OS=Rattus norvegicus GN=Calm2 PE=1 SV=1	GLLP	GLLP	GLLP
P0DP29	1	Calmodulin-1 OS=Rattus norvegicus GN=Calm1 PE=1 SV=1	GLLP	GLLP	GLLP
Q5XHZ0	1	Heat shock protein 75 kDa_ mitochondrial OS=Rattus norvegicus GN=Trap1 PE=1 SV=1	GLLP	GLLP	GLLP
P82995	1	Heat shock protein HSP 90-alpha OS=Rattus norvegicus GN=Hsp90aa1 PE=1 SV=3	GLLP	GLLP	GLLP
Q80VT8	1	S100 calcium-binding protein OS=Rattus norvegicus GN=S100vp PE=2 SV=1	GLLP	GLLP	GLLP
A0A1W2Q6E9	1	Moesin OS=Rattus norvegicus GN=Msn PE=1 SV=1	GLLP	GLLP	GLLP
M0RCZ9	1	Peptidyl-prolyl cis-trans isomerase OS=Rattus norvegicus GN=Ppial4g PE=1 SV=2	GLLP	GLLP	GLLP
G3V9M0	1	Cystatin OS=Rattus norvegicus GN=LOC296235 PE=3 SV=1	GLLP	GLLP	GLLP
Q9Z0V5	1	Peroxiredoxin-4 OS=Rattus norvegicus GN=Prdx4 PE=2 SV=1	GLLP	GLLP	GLLP
P31977	1	Ezrin OS=Rattus norvegicus GN=Ezr PE=1 SV=3	GLLP	GLLP	GLLP
A0A096MK30	1	Moesin OS=Rattus norvegicus GN=Msn PE=1 SV=1	GLLP	GLLP	GLLP
O35763	1	Moesin OS=Rattus norvegicus GN=Msn PE=1 SV=3	GLLP	GLLP	GLLP
D4ABV5	1	Calmodulin-2 OS=Rattus norvegicus GN=Calm2 PE=1 SV=1	GLLP	GLLP	GLLP
Q62669	2	Globin a1 OS=Rattus norvegicus GN=LOC103694855 PE=1 SV=1	GLLP	GLLP	GLLP
Q00729	2	Histone H2B type 1-A OS=Rattus norvegicus GN=Hist1h2ba PE=1 SV=2	GLLP	GLLP	GLLP
F1M927	2	Ribosomal protein S27a_ pseudogene 5 OS=Rattus norvegicus GN=Rps27a-ps5 PE=4 SV=2	GLLP	GLLP	GLLP
P22282	2	Cystatin-related protein 1 OS=Rattus norvegicus GN=Andpro PE=1 SV=1	GLLP	GLLP	GLLP
R4GNK3	2	Thioredoxin OS=Rattus norvegicus GN=Txn1 PE=1 SV=1	GLLP	GLLP	GLLP
P11232	2	Thioredoxin OS=Rattus norvegicus GN=Txn PE=1 SV=2	GLLP	GLLP	GLLP
A0A0G2JTW9	2	Hemoglobin_ beta adult major chain OS=Rattus norvegicus GN=Hbb-b1 PE=1 SV=1	GLLP	GLLP	GLLP
A0A0G2JSU6	2	Cystatin OS=Rattus norvegicus GN=Andpro PE=3 SV=1	GLLP	GLLP	GLLP

## Sheet: PND 21 down regulated proteins
Accession	OK	Description	Unique	GLLP:CTR_Ratio	GLLP:CTR__P
P62963	1	Profilin-1 OS=Rattus norvegicus GN=Pfn1 PE=1 SV=2		0.463013	0
P02091	2	Hemoglobin subunit beta-1 OS=Rattus norvegicus GN=Hbb PE=1 SV=3		0.532592	0
A0A0G2JSW3	2	Globin a4 OS=Rattus norvegicus GN=Hbb PE=1 SV=1		0.537944	0
P01946	2	Hemoglobin subunit alpha-1/2 OS=Rattus norvegicus GN=Hba1 PE=1 SV=3		0.548812	0
A0A0G2JSV6	2	Globin c2 OS=Rattus norvegicus GN=Hba-a2 PE=1 SV=1		0.548812	0
O88752	2	Epsilon 1 globin OS=Rattus norvegicus GN=Hbe1 PE=1 SV=1		0.571209	0
P11517	2	Hemoglobin subunit beta-2 OS=Rattus norvegicus PE=1 SV=2		0.57695	0
P60711	2	Actin_ cytoplasmic 1 OS=Rattus norvegicus GN=Actb PE=1 SV=1		0.878095	0
P63259	2	Actin_ cytoplasmic 2 OS=Rattus norvegicus GN=Actg1 PE=1 SV=1		0.895834	0
A0A0G2K3K2	2	Actin_ cytoplasmic 1 OS=Rattus norvegicus GN=Actb PE=1 SV=1		0.895834	0
P62804	2	Histone H4 OS=Rattus norvegicus GN=Hist1h4b PE=1 SV=2		0.794534	0.01
P35213	1	14-3-3 protein beta/alpha OS=Rattus norvegicus GN=Ywhab PE=1 SV=3	CTR	CTR	CTR
A0A0G2K2B8	1	14-3-3 protein eta OS=Rattus norvegicus GN=Ywhah PE=1 SV=1	CTR	CTR	CTR
P61983	1	14-3-3 protein gamma OS=Rattus norvegicus GN=Ywhag PE=1 SV=2	CTR	CTR	CTR
P68255	1	14-3-3 protein theta OS=Rattus norvegicus GN=Ywhaq PE=1 SV=1	CTR	CTR	CTR
D3ZYM6	1	Calreticulin 4 OS=Rattus norvegicus GN=Calr4 PE=1 SV=2	CTR	CTR	CTR
P68511	1	14-3-3 protein eta OS=Rattus norvegicus GN=Ywhah PE=1 SV=2	CTR	CTR	CTR
Q5EBB0	1	Similar to 14-3-3 protein sigma OS=Rattus norvegicus GN=LOC298795 PE=2 SV=1	CTR	CTR	CTR
F1M5A1	1	Calreticulin 4 OS=Rattus norvegicus GN=Calr4 PE=1 SV=2	CTR	CTR	CTR
G3V9A3	1	RCG31390 OS=Rattus norvegicus GN=Sfn PE=3 SV=1	CTR	CTR	CTR

## Sheet: PND 21 up regulated proteins
Accession	OK	Description	Unique	GLLP:CTR_Ratio	GLLP:CTR__P
P84083	1	ADP-ribosylation factor 5 OS=Rattus norvegicus GN=Arf5 PE=1 SV=2		1.1853	0.95
P61751	1	ADP-ribosylation factor 4 OS=Rattus norvegicus GN=Arf4 PE=2 SV=2		1.1853	0.95
A0A0G2K9H8	1	ADP-ribosylation factor 3 OS=Rattus norvegicus GN=Arf3 PE=3 SV=1		1.19722	0.95
A0A0G2K4Q4	1	ADP-ribosylation factor 3 OS=Rattus norvegicus GN=Arf3 PE=3 SV=1		1.20925	0.95
P70550	1	Ras-related protein Rab-8B OS=Rattus norvegicus GN=Rab8b PE=1 SV=1		1.20925	0.95
G3V6H0	1	RAB1B_ member RAS oncogene family-like OS=Rattus norvegicus GN=LOC100363782 PE=4 SV=1		1.20925	0.95
P47727	2	Carbonyl reductase [NADPH] 1 OS=Rattus norvegicus GN=Cbr1 PE=1 SV=2		1.2214	0.95
A0A0G2JSH9	1	Peroxiredoxin-2 OS=Rattus norvegicus GN=Prdx2 PE=1 SV=1		1.41907	0.95
P35289	1	Ras-related protein Rab-15 OS=Rattus norvegicus GN=Rab15 PE=2 SV=1		1.20925	0.96
E9PU16	1	RAB1A_ member RAS oncogene family OS=Rattus norvegicus GN=Rab1a PE=1 SV=2		1.2214	0.96
Q5U316	1	Ras-related protein Rab-35 OS=Rattus norvegicus GN=Rab35 PE=1 SV=1		1.2214	0.96
P35280	1	Ras-related protein Rab-8A OS=Rattus norvegicus GN=Rab8a PE=1 SV=2		1.23368	0.96
P10536	1	Ras-related protein Rab-1B OS=Rattus norvegicus GN=Rab1b PE=1 SV=1		1.2214	0.97
P35281	1	Ras-related protein Rab-10 OS=Rattus norvegicus GN=Rab10 PE=1 SV=1		1.2214	0.97
Q5RKJ9	1	RAB10_ member RAS oncogene family OS=Rattus norvegicus GN=Rab10 PE=1 SV=1		1.23368	0.97
P31232	2	Transgelin OS=Rattus norvegicus GN=Tagln PE=1 SV=2		1.23368	0.97
Q6NYB7	1	Ras-related protein Rab-1A OS=Rattus norvegicus GN=Rab1A PE=1 SV=3		1.24608	0.97
A0A0A0MXW3	2	Histone H2A OS=Rattus norvegicus GN=H2afz PE=3 SV=1		1.17351	0.98
D4AEC0	2	Histone H2A OS=Rattus norvegicus GN=H2afv PE=3 SV=1		1.1853	0.98
Q5BK56	1	Glutathione S-transferase OS=Rattus norvegicus GN=Gstm4 PE=1 SV=1		1.2214	0.98
M0R3X6	2	Carbonyl reductase [NADPH] 1 OS=Rattus norvegicus GN=Cbr1 PE=1 SV=1		1.24608	0.98
A0A0G2K658	2	Carbonyl reductase [NADPH] 1 OS=Rattus norvegicus GN=LOC102556347 PE=1 SV=1		1.24608	0.98
B5DEI2	1	Amine oxidase OS=Rattus norvegicus GN=Lao1 PE=2 SV=1		1.15027	0.99
P10719	1	ATP synthase subunit beta_ mitochondrial OS=Rattus norvegicus GN=Atp5b PE=1 SV=2		1.16183	0.99
P0C0S7	2	Histone H2A.Z OS=Rattus norvegicus GN=H2afz PE=1 SV=2		1.17351	0.99
P08009	1	Glutathione S-transferase Yb-3 OS=Rattus norvegicus GN=Gstm3 PE=1 SV=2		1.19722	0.99
P63018	2	Heat shock cognate 71 kDa protein OS=Rattus norvegicus GN=Hspa8 PE=1 SV=1		1.19722	0.99
A0A096MJ24	2	Carbonyl reductase [NADPH] 1 OS=Rattus norvegicus GN=Cbr1 PE=1 SV=1		1.20925	0.99
P14659	2	Heat shock-related 70 kDa protein 2 OS=Rattus norvegicus GN=Hspa2 PE=1 SV=2		1.20925	0.99
A0A0G2JWK7	2	Transgelin OS=Rattus norvegicus GN=Tagln PE=1 SV=1		1.2214	0.99
A0A0G2K2E4	1	Peptidyl-prolyl cis-trans isomerase OS=Rattus norvegicus GN=LOC100911252 PE=3 SV=1		1.23368	0.99
A0A0G2K235	1	RAB1A_ member RAS oncogene family OS=Rattus norvegicus GN=Rab1a PE=1 SV=1		1.23368	0.99
A0A0G2JSV2	2	Carbonyl reductase [NADPH] 1 OS=Rattus norvegicus GN=Cbr1 PE=1 SV=1		1.23368	0.99
G3V6D3	1	ATP synthase subunit beta OS=Rattus norvegicus GN=Atp5b PE=1 SV=1		1.16183	1
D3ZXP3	2	Histone H2A OS=Rattus norvegicus GN=H2afx PE=1 SV=1		1.17351	1
M0RCB1	2	Uncharacterized protein OS=Rattus norvegicus PE=3 SV=1		1.1853	1
D4A4S3	2	Heat shock cognate 71 kDa protein OS=Rattus norvegicus GN=Hspa8 PE=3 SV=3		1.1853	1
A0A0G2K7Y9	2	Spermine-binding protein-like OS=Rattus norvegicus GN=Sbpl PE=4 SV=1		1.23368	1
A0A0G2JZ90	2	Spermine-binding protein-like OS=Rattus norvegicus GN=Sbpl PE=4 SV=1		1.23368	1
A0A0G2JUT0	2	Heat shock-related 70 kDa protein 2 OS=Rattus norvegicus GN=Hspa2 PE=1 SV=1		1.23368	1
A0A0G2K176	2	Prostatic spermine-binding protein OS=Rattus norvegicus GN=Sbp PE=4 SV=1		1.23368	1
F1M6C2	2	Elongation factor 1-alpha 1 pseudogene OS=Rattus norvegicus GN=LOC103691939 PE=1 SV=1		1.24608	1
P08723	2	Prostatic spermine-binding protein OS=Rattus norvegicus GN=Sbp PE=1 SV=1		1.24608	1
A0A0G2K4C9	2	Prostatic spermine-binding protein OS=Rattus norvegicus GN=Sbp PE=4 SV=1		1.24608	1
A0A0G2JTU6	2	Prostatic spermine-binding protein OS=Rattus norvegicus GN=Sbp PE=4 SV=1		1.24608	1
B2GV72	2	Carbonyl reductase 3 OS=Rattus norvegicus GN=Cbr3 PE=1 SV=1		1.28403	1
M0R8M9	2	Heat shock cognate 71 kDa protein OS=Rattus norvegicus GN=Hspa8 PE=3 SV=2		1.28403	1
M0RBQ5	2	Histone H2B OS=Rattus norvegicus GN=Hist3h2bb PE=3 SV=1		1.29693	1
D3ZNZ9	2	Histone H2B OS=Rattus norvegicus GN=Hist3h2ba PE=3 SV=1		1.29693	1
M0R4L7	2	Histone H2B OS=Rattus norvegicus GN=Hist1h2bl PE=3 SV=1		1.29693	1
A0A0G2JXI9	2	Histone H2B OS=Rattus norvegicus GN=Hist1h2bo PE=3 SV=1		1.30996	1
G3V8B3	2	Histone H2B OS=Rattus norvegicus GN=Hist1h2bq PE=3 SV=1		1.30996	1
A0A0G2JXE0	2	Histone H2B OS=Rattus norvegicus GN=LOC102549061 PE=3 SV=1		1.30996	1
D4A817	2	Histone H2B OS=Rattus norvegicus GN=Hist2h2be PE=3 SV=3		1.30996	1
G3V9C7	2	Histone H2B OS=Rattus norvegicus GN=Hist1h2bk PE=3 SV=1		1.30996	1
D3ZWM5	2	Histone H2B OS=Rattus norvegicus GN=Hist1h2bd PE=3 SV=2		1.30996	1
P08010	1	Glutathione S-transferase Mu 2 OS=Rattus norvegicus GN=Gstm2 PE=1 SV=2		1.32313	1
A0A0G2K4U2	1	Glutathione S-transferase Mu 2 OS=Rattus norvegicus GN=Gstm7 PE=1 SV=1		1.32313	1
Q00715	2	Histone H2B type 1 OS=Rattus norvegicus PE=1 SV=2		1.32313	1
D3ZLY9	2	Histone H2B OS=Rattus norvegicus GN=Hist1h2bh PE=3 SV=2		1.32313	1
P62630	2	Elongation factor 1-alpha 1 OS=Rattus norvegicus GN=Eef1a1 PE=2 SV=1		1.32313	1
D3ZNH4	2	Histone H2B OS=Rattus norvegicus GN=Hist1h2bo PE=3 SV=1		1.32313	1
M0R757	2	Elongation factor 1-alpha OS=Rattus norvegicus GN=LOC100360413 PE=3 SV=1		1.32313	1
P55063	2	Heat shock 70 kDa protein 1-like OS=Rattus norvegicus GN=Hspa1l PE=2 SV=2		1.39097	1
P0DMW1	2	Heat shock 70 kDa protein 1B OS=Rattus norvegicus GN=Hspa1b PE=2 SV=1		1.39097	1
E9PTV9	1	Glyceraldehyde-3-phosphate dehydrogenase OS=Rattus norvegicus GN=RGD1562758 PE=1 SV=2		1.41907	1
P0DMW0	2	Heat shock 70 kDa protein 1A OS=Rattus norvegicus GN=Hspa1a PE=2 SV=1		1.41907	1
A0A0G2JSS8	1	Peroxiredoxin 5_ isoform CRA_c OS=Rattus norvegicus GN=Prdx5 PE=1 SV=1		1.43333	1
Q9R063	1	Peroxiredoxin-5_ mitochondrial OS=Rattus norvegicus GN=Prdx5 PE=1 SV=1		1.43333	1
P11598	2	Protein disulfide-isomerase A3 OS=Rattus norvegicus GN=Pdia3 PE=1 SV=2		1.43333	1
A0A0H2UHM5	2	Protein disulfide-isomerase OS=Rattus norvegicus GN=Pdia3 PE=1 SV=1		1.43333	1
P10111	1	Peptidyl-prolyl cis-trans isomerase A OS=Rattus norvegicus GN=Ppia PE=1 SV=2		1.52196	1
A0A0G2K1P0	1	Peptidyl-prolyl cis-trans isomerase OS=Rattus norvegicus GN=Ppia PE=1 SV=1		1.52196	1
P07647	2	Submandibular glandular kallikrein-9 OS=Rattus norvegicus GN=Klk9 PE=1 SV=1		1.52196	1
P06761	2	78 kDa glucose-regulated protein OS=Rattus norvegicus GN=Hspa5 PE=1 SV=1		1.53726	1
A0A0G2JX00	2	Kallikrein 1 OS=Rattus norvegicus GN=Klk1c9 PE=3 SV=1		1.53726	1
A0A0G2K7R1	2	Uncharacterized protein OS=Rattus norvegicus PE=3 SV=1		1.53726	1
P0CG51	1	Polyubiquitin-B OS=Rattus norvegicus GN=Ubb PE=1 SV=1		1.55271	1
F1LML2	1	Polyubiquitin-C OS=Rattus norvegicus GN=Ubc PE=4 SV=1		1.55271	1
P62986	1	Ubiquitin-60S ribosomal protein L40 OS=Rattus norvegicus GN=Uba52 PE=1 SV=2		1.55271	1
Q63429	1	Polyubiquitin-C OS=Rattus norvegicus GN=Ubc PE=1 SV=1		1.56831	1
P62982	1	Ubiquitin-40S ribosomal protein S27a OS=Rattus norvegicus GN=Rps27a PE=1 SV=2		1.58407	1
D3Z9U8	2	Similar to S100 calcium-binding protein_ ventral prostate OS=Rattus norvegicus GN=RGD1562234 PE=4 SV=1		1.58407	1
F1LU69	1	Ubiquitin B pseudogene 4 OS=Rattus norvegicus GN=Ubbp4 PE=4 SV=3		1.63232	1
P02770	2	Serum albumin OS=Rattus norvegicus GN=Alb PE=1 SV=2		1.64872	1
A0A0G2JSH5	2	Serum albumin OS=Rattus norvegicus GN=Alb PE=1 SV=1		1.66529	1
Q6I8Q6	2	Histone H2A OS=Rattus norvegicus GN=Hist1h2af PE=3 SV=1		1.68203	1
Q64598	2	Histone H2A type 1-F OS=Rattus norvegicus PE=3 SV=3		1.69893	1
D3ZVK7	2	Histone H2A OS=Rattus norvegicus GN=Hist1h2ak PE=3 SV=1		1.71601	1
Q63081	1	Protein disulfide-isomerase A6 OS=Rattus norvegicus GN=Pdia6 PE=1 SV=2		1.73325	1
A0A0G2JSZ5	1	Protein disulfide-isomerase A6 OS=Rattus norvegicus GN=Pdia6 PE=1 SV=1		1.73325	1
D3ZGY4	1	Glyceraldehyde-3-phosphate dehydrogenase OS=Rattus norvegicus GN=Gapdh-ps2 PE=1 SV=1		1.75067	1
P04785	1	Protein disulfide-isomerase OS=Rattus norvegicus GN=P4hb PE=1 SV=2		1.75067	1
M0R590	1	Glyceraldehyde-3-phosphate dehydrogenase OS=Rattus norvegicus GN=LOC108351137 PE=3 SV=1		1.76827	1
M0R660	1	Glyceraldehyde-3-phosphate dehydrogenase OS=Rattus norvegicus PE=1 SV=1		1.78604	1
Q00728	2	Histone H2A type 4 OS=Rattus norvegicus PE=2 SV=2		1.78604	1
G3V9C0	2	Histone H2A OS=Rattus norvegicus GN=Hist1h2ac PE=3 SV=1		1.78604	1
P04797	1	Glyceraldehyde-3-phosphate dehydrogenase OS=Rattus norvegicus GN=Gapdh PE=1 SV=3		1.80399	1
P0CC09	2	Histone H2A type 2-A OS=Rattus norvegicus GN=Hist2h2aa3 PE=1 SV=1		1.80399	1
P02780	2	Secretoglobin family 2A member 2 OS=Rattus norvegicus GN=Scgb2a2 PE=1 SV=1		1.82212	1
D4ACV3	2	Histone H2A OS=Rattus norvegicus GN=Hist2h2ac PE=3 SV=2		1.84043	1
M0RDM4	2	Histone H2A OS=Rattus norvegicus GN=LOC680322 PE=3 SV=1		1.85893	1
M0RCL5	2	Histone H2A OS=Rattus norvegicus GN=LOC100910554 PE=1 SV=1		1.85893	1
A9UMV8	2	Histone H2A.J OS=Rattus norvegicus GN=H2afj PE=2 SV=1		1.89648	1
P0C170	2	Histone H2A type 1-E OS=Rattus norvegicus PE=1 SV=2		1.89648	1
P0C169	2	Histone H2A type 1-C OS=Rattus norvegicus PE=1 SV=2		1.89648	1
P02262	2	Histone H2A type 1 OS=Rattus norvegicus PE=1 SV=2		1.93479	1
Q4FZT6	2	Histone H2A type 3 OS=Rattus norvegicus PE=2 SV=3		1.95424	1
P18418	2	Calreticulin OS=Rattus norvegicus GN=Calr PE=1 SV=1		2.18147	1
A0A0H2UHR8	2	Prostatic steroid-binding protein C2 OS=Rattus norvegicus GN=Psbpc2 PE=4 SV=1		2.36316	1
P02781	2	Prostatic steroid-binding protein C2 OS=Rattus norvegicus GN=Psbpc2 PE=1 SV=1		2.4596	1
M0R6X5	2	Histone H2A OS=Rattus norvegicus PE=3 SV=2		2.4596	1
P02782	2	Prostatic steroid-binding protein C1 OS=Rattus norvegicus GN=Psbpc1 PE=1 SV=1		3.03436	1
P22283	1	Cystatin-related protein 2 OS=Rattus norvegicus GN=Crp2 PE=2 SV=1		3.78104	1
Z4YNX7	1	Cystatin OS=Rattus norvegicus GN=P22k15 PE=3 SV=2		3.78104	1
A0A0G2K890	1	Ezrin OS=Rattus norvegicus GN=Ezr PE=1 SV=1	GLLP	GLLP	GLLP
P0DP31	1	Calmodulin-3 OS=Rattus norvegicus GN=Calm3 PE=1 SV=1	GLLP	GLLP	GLLP
P0DP30	1	Calmodulin-2 OS=Rattus norvegicus GN=Calm2 PE=1 SV=1	GLLP	GLLP	GLLP
P0DP29	1	Calmodulin-1 OS=Rattus norvegicus GN=Calm1 PE=1 SV=1	GLLP	GLLP	GLLP
Q5XHZ0	1	Heat shock protein 75 kDa_ mitochondrial OS=Rattus norvegicus GN=Trap1 PE=1 SV=1	GLLP	GLLP	GLLP
P82995	1	Heat shock protein HSP 90-alpha OS=Rattus norvegicus GN=Hsp90aa1 PE=1 SV=3	GLLP	GLLP	GLLP
Q80VT8	1	S100 calcium-binding protein OS=Rattus norvegicus GN=S100vp PE=2 SV=1	GLLP	GLLP	GLLP
A0A1W2Q6E9	1	Moesin OS=Rattus norvegicus GN=Msn PE=1 SV=1	GLLP	GLLP	GLLP
M0RCZ9	1	Peptidyl-prolyl cis-trans isomerase OS=Rattus norvegicus GN=Ppial4g PE=1 SV=2	GLLP	GLLP	GLLP
G3V9M0	1	Cystatin OS=Rattus norvegicus GN=LOC296235 PE=3 SV=1	GLLP	GLLP	GLLP
Q9Z0V5	1	Peroxiredoxin-4 OS=Rattus norvegicus GN=Prdx4 PE=2 SV=1	GLLP	GLLP	GLLP
P31977	1	Ezrin OS=Rattus norvegicus GN=Ezr PE=1 SV=3	GLLP	GLLP	GLLP
A0A096MK30	1	Moesin OS=Rattus norvegicus GN=Msn PE=1 SV=1	GLLP	GLLP	GLLP
O35763	1	Moesin OS=Rattus norvegicus GN=Msn PE=1 SV=3	GLLP	GLLP	GLLP
D4ABV5	1	Calmodulin-2 OS=Rattus norvegicus GN=Calm2 PE=1 SV=1	GLLP	GLLP	GLLP
Q62669	2	Globin a1 OS=Rattus norvegicus GN=LOC103694855 PE=1 SV=1	GLLP	GLLP	GLLP
Q00729	2	Histone H2B type 1-A OS=Rattus norvegicus GN=Hist1h2ba PE=1 SV=2	GLLP	GLLP	GLLP
F1M927	2	Ribosomal protein S27a_ pseudogene 5 OS=Rattus norvegicus GN=Rps27a-ps5 PE=4 SV=2	GLLP	GLLP	GLLP
P22282	2	Cystatin-related protein 1 OS=Rattus norvegicus GN=Andpro PE=1 SV=1	GLLP	GLLP	GLLP
R4GNK3	2	Thioredoxin OS=Rattus norvegicus GN=Txn1 PE=1 SV=1	GLLP	GLLP	GLLP
P11232	2	Thioredoxin OS=Rattus norvegicus GN=Txn PE=1 SV=2	GLLP	GLLP	GLLP
A0A0G2JTW9	2	Hemoglobin_ beta adult major chain OS=Rattus norvegicus GN=Hbb-b1 PE=1 SV=1	GLLP	GLLP	GLLP
A0A0G2JSU6	2	Cystatin OS=Rattus norvegicus GN=Andpro PE=3 SV=1	GLLP	GLLP	GLLP

## Sheet: PND 540 GLLPxCTR
Accession	OK	Description	Unique	GLLP:CTR_Ratio	GLLP:CTR__P
A0A0G2K3K2	2	Actin_ cytoplasmic 1 OS=Rattus norvegicus GN=Actb PE=1 SV=1		0.951229	0
P14046	2	Alpha-1-inhibitor 3 OS=Rattus norvegicus GN=A1i3 PE=1 SV=1		0.427415	0
A0A0G2K926	2	Alpha-1-inhibitor III OS=Rattus norvegicus GN=LOC297568 PE=1 SV=1		0.40657	0
G3V9J1	2	Alpha-1-inhibitor III OS=Rattus norvegicus GN=LOC297568 PE=1 SV=3		0.516851	0
A0A0G2JUW7	2	Alpha-1-inhibitor III OS=Rattus norvegicus GN=Mug1 PE=1 SV=1		0.472367	0
A0A0G2JUP5	2	Alpha-1-inhibitor III OS=Rattus norvegicus GN=Mug1 PE=1 SV=1		0.496585	0
D4A6E3	2	Alpha-1-inhibitor III OS=Rattus norvegicus GN=Mug1 PE=1 SV=2		0.472367	0
D4AA52	2	Alpha-1-inhibitor III OS=Rattus norvegicus GN=Mug1 PE=1 SV=3		0.410656	0
Q63041	2	Alpha-1-macroglobulin OS=Rattus norvegicus GN=A1m PE=1 SV=1		0.612626	0
B2GV72	2	Carbonyl reductase 3 OS=Rattus norvegicus GN=Cbr3 PE=1 SV=1		0.860708	0
Z4YNX7	2	Cystatin OS=Rattus norvegicus GN=P22k15 PE=3 SV=2		0.554327	0
P22283	2	Cystatin-related protein 2 OS=Rattus norvegicus GN=Crp2 PE=2 SV=1		0.554327	0
F1M6C2	2	Elongation factor 1-alpha 1 pseudogene OS=Rattus norvegicus GN=LOC103691939 PE=1 SV=1		0.402524	0
O88752	2	Epsilon 1 globin OS=Rattus norvegicus GN=Hbe1 PE=1 SV=1		0.83527	0
A0A0G2JSW3	2	Globin a4 OS=Rattus norvegicus GN=Hbb PE=1 SV=1		0.88692	0
A0A0G2JSV6	2	Globin c2 OS=Rattus norvegicus GN=Hba-a2 PE=1 SV=1		0.794534	0
P01946	2	Hemoglobin subunit alpha-1/2 OS=Rattus norvegicus GN=Hba1 PE=1 SV=3		0.778801	0
P02091	2	Hemoglobin subunit beta-1 OS=Rattus norvegicus GN=Hbb PE=1 SV=3		0.895834	0
P11517	2	Hemoglobin subunit beta-2 OS=Rattus norvegicus PE=1 SV=2		0.826959	0
D3ZWM5	2	Histone H2B OS=Rattus norvegicus GN=Hist1h2bd PE=3 SV=2		0.726149	0
D3ZLY9	2	Histone H2B OS=Rattus norvegicus GN=Hist1h2bh PE=3 SV=2		0.71177	0
M0R4L7	2	Histone H2B OS=Rattus norvegicus GN=Hist1h2bl PE=3 SV=1		0.71177	0
A0A0G2JXI9	2	Histone H2B OS=Rattus norvegicus GN=Hist1h2bo PE=3 SV=1		0.718924	0
D3ZNH4	2	Histone H2B OS=Rattus norvegicus GN=Hist1h2bo PE=3 SV=1		0.71177	0
G3V8B3	2	Histone H2B OS=Rattus norvegicus GN=Hist1h2bq PE=3 SV=1		0.71177	0
D4A817	2	Histone H2B OS=Rattus norvegicus GN=Hist2h2be PE=3 SV=3		0.718924	0
M0RBQ5	2	Histone H2B OS=Rattus norvegicus GN=Hist3h2bb PE=3 SV=1		0.71177	0
A0A0G2JXE0	2	Histone H2B OS=Rattus norvegicus GN=LOC102549061 PE=3 SV=1		0.718924	0
P20759	2	Ig gamma-1 chain C region OS=Rattus norvegicus PE=1 SV=1		0.336216	0
P20760	2	Ig gamma-2A chain C region OS=Rattus norvegicus GN=Igg-2a PE=1 SV=1		0.600496	0
A0A0G2K9Y0	2	Immunoglobulin heavy constant mu OS=Rattus norvegicus GN=Ighm PE=4 SV=1		0.319819	0
F1LPQ6	2	Immunoglobulin heavy constant mu OS=Rattus norvegicus GN=Ighm PE=4 SV=2		0.332871	0
F1LN61	2	Immunoglobulin heavy constant mu OS=Rattus norvegicus GN=Ighm PE=4 SV=3		0.310367	0
Q5BJY9	2	Keratin_ type I cytoskeletal 18 OS=Rattus norvegicus GN=Krt18 PE=1 SV=3		0.718924	0
Q10758	2	Keratin_ type II cytoskeletal 8 OS=Rattus norvegicus GN=Krt8 PE=1 SV=3		0.802519	0
Q03626	2	Murinoglobulin-1 OS=Rattus norvegicus GN=Mug1 PE=2 SV=1		0.477114	0
Q6IE52	2	Murinoglobulin-2 OS=Rattus norvegicus GN=Mug2 PE=1 SV=1		0.486752	0
M0R5V7	2	Murinoglobulin-2 OS=Rattus norvegicus GN=Mug2 PE=1 SV=2		0.472367	0
P10111	2	Peptidyl-prolyl cis-trans isomerase A OS=Rattus norvegicus GN=Ppia PE=1 SV=2		0.559898	0
A0A0G2K2E4	2	Peptidyl-prolyl cis-trans isomerase OS=Rattus norvegicus GN=LOC100911252 PE=3 SV=1		0.559898	0
A0A0G2K1P0	2	Peptidyl-prolyl cis-trans isomerase OS=Rattus norvegicus GN=Ppia PE=1 SV=1		0.554327	0
P02782	2	Prostatic steroid-binding protein C1 OS=Rattus norvegicus GN=Psbpc1 PE=1 SV=1		0.496585	0
P11598	2	Protein disulfide-isomerase A3 OS=Rattus norvegicus GN=Pdia3 PE=1 SV=2		0.88692	0
A0A0H2UHM5	2	Protein disulfide-isomerase OS=Rattus norvegicus GN=Pdia3 PE=1 SV=1		0.895834	0
P05964	2	Protein S100-A6 OS=Rattus norvegicus GN=S100a6 PE=1 SV=3		0.740818	0
P02769	2	Serum albumin OS=Bos taurus GN=ALB PE=1 SV=4		0.398519	0
A0A0G2JSH5	2	Serum albumin OS=Rattus norvegicus GN=Alb PE=1 SV=1		0.733447	0
P02770	2	Serum albumin OS=Rattus norvegicus GN=Alb PE=1 SV=2		0.71177	0
R4GNK3	2	Thioredoxin OS=Rattus norvegicus GN=Txn1 PE=1 SV=1		0.625002	0
A0A0G2JWK7	2	Transgelin OS=Rattus norvegicus GN=Tagln PE=1 SV=1		0.718924	0
P31232	2	Transgelin OS=Rattus norvegicus GN=Tagln PE=1 SV=2		0.71177	0
A0A0G2JVI3	2	Uncharacterized protein OS=Rattus norvegicus PE=3 SV=1		0.755784	0
D3ZRN3	2	Actin_ beta-like 2 OS=Rattus norvegicus GN=Actbl2 PE=1 SV=1		0.913931	0.01
P63259	2	Actin_ cytoplasmic 2 OS=Rattus norvegicus GN=Actg1 PE=1 SV=1		0.951229	0.01
P01026	2	Complement C3 OS=Rattus norvegicus GN=C3 PE=1 SV=3		0.582748	0.01
D3ZNZ9	2	Histone H2B OS=Rattus norvegicus GN=Hist3h2ba PE=3 SV=1		0.718924	0.01
P60711	2	Actin_ cytoplasmic 1 OS=Rattus norvegicus GN=Actb PE=1 SV=1		0.951229	0.02
A0A0G2QC50	2	CD55 molecule_ decay accelerating factor for complement OS=Rattus norvegicus GN=Cd55 PE=1 SV=1		0.802519	0.02
M0RCB1	2	Uncharacterized protein OS=Rattus norvegicus PE=3 SV=1		0.869358	0.02
A0A0G2QC06	2	Serotransferrin OS=Rattus norvegicus GN=Tf PE=1 SV=1		0.895834	0.03
P12346	2	Serotransferrin OS=Rattus norvegicus GN=Tf PE=1 SV=3		0.895834	0.03
D4A4S3	2	Heat shock cognate 71 kDa protein OS=Rattus norvegicus GN=Hspa8 PE=3 SV=3		0.895834	0.04
Q00715	2	Histone H2B type 1 OS=Rattus norvegicus PE=1 SV=2		0.726149	0.04
P04797	2	Glyceraldehyde-3-phosphate dehydrogenase OS=Rattus norvegicus GN=Gapdh PE=1 SV=3		0.794534	0.05
M0R660	2	Glyceraldehyde-3-phosphate dehydrogenase OS=Rattus norvegicus PE=1 SV=1		0.771052	0.05
A0A0G2JUT0	2	Heat shock-related 70 kDa protein 2 OS=Rattus norvegicus GN=Hspa2 PE=1 SV=1		0.88692	0.06
P20761	2	Ig gamma-2B chain C region OS=Rattus norvegicus GN=Igh-1a PE=1 SV=1		0.571209	0.07
G3V9C7	2	Histone H2B OS=Rattus norvegicus GN=Hist1h2bk PE=3 SV=1		0.763379	0.08
P46462	2	Transitional endoplasmic reticulum ATPase OS=Rattus norvegicus GN=Vcp PE=1 SV=3		0.895834	0.08
P14659	2	Heat shock-related 70 kDa protein 2 OS=Rattus norvegicus GN=Hspa2 PE=1 SV=2		0.895834	0.09
P0CG51	2	Polyubiquitin-B OS=Rattus norvegicus GN=Ubb PE=1 SV=1		0.932394	0.1
P04764	2	Alpha-enolase OS=Rattus norvegicus GN=Eno1 PE=1 SV=4		0.88692	0.11
F1LML2	2	Polyubiquitin-C OS=Rattus norvegicus GN=Ubc PE=4 SV=1		0.932394	0.12
M0R590	2	Glyceraldehyde-3-phosphate dehydrogenase OS=Rattus norvegicus GN=LOC108351137 PE=3 SV=1		0.843665	0.13
B5DEI2	2	Amine oxidase OS=Rattus norvegicus GN=Lao1 PE=2 SV=1		0.491644	0.14
E9PTN6	2	Glyceraldehyde-3-phosphate dehydrogenase OS=Rattus norvegicus PE=3 SV=1		0.83527	0.14
P62982	2	Ubiquitin-40S ribosomal protein S27a OS=Rattus norvegicus GN=Rps27a PE=1 SV=2		0.932394	0.14
B1WBQ8	2	Glyceraldehyde-3-phosphate dehydrogenase OS=Rattus norvegicus GN=Gapdhs PE=1 SV=1		0.843665	0.15
A0A0H2UHR8	2	Prostatic steroid-binding protein C2 OS=Rattus norvegicus GN=Psbpc2 PE=4 SV=1		0.970446	0.15
F1LZI1	2	Similar to heat shock protein 8 OS=Rattus norvegicus GN=LOC680121 PE=3 SV=2		0.802519	0.15
P62986	2	Ubiquitin-60S ribosomal protein L40 OS=Rattus norvegicus GN=Uba52 PE=1 SV=2		0.941765	0.16
Q63429	2	Polyubiquitin-C OS=Rattus norvegicus GN=Ubc PE=1 SV=1		0.951229	0.17
Q6P136	2	Hyou1 protein OS=Rattus norvegicus GN=Hyou1 PE=1 SV=1		0.748264	0.18
F1LU69	2	Ubiquitin B pseudogene 4 OS=Rattus norvegicus GN=Ubbp4 PE=4 SV=3		0.941765	0.18
M0R5J4	2	Uncharacterized protein OS=Rattus norvegicus PE=3 SV=1		0.904837	0.18
Q9ESV6	2	Glyceraldehyde-3-phosphate dehydrogenase_ testis-specific OS=Rattus norvegicus GN=Gapdhs PE=1 SV=1		0.860708	0.19
D3ZGY4	2	Glyceraldehyde-3-phosphate dehydrogenase OS=Rattus norvegicus GN=Gapdh-ps2 PE=1 SV=1		0.88692	0.27
P19944	2	60S acidic ribosomal protein P1 OS=Rattus norvegicus GN=Rplp1 PE=3 SV=1		0.941765	0.3
A0A0G2K8S2	2	Uncharacterized protein OS=Rattus norvegicus GN=RGD1564958 PE=1 SV=1		0.923116	0.33
D3ZME3	2	Uncharacterized protein OS=Rattus norvegicus PE=1 SV=1		0.904837	0.35
P20059	2	Hemopexin OS=Rattus norvegicus GN=Hpx PE=1 SV=3		0.960789	0.37
Q63279	2	Keratin_ type I cytoskeletal 19 OS=Rattus norvegicus GN=Krt19 PE=1 SV=2		0.923116	0.38
G3V8V3	2	Alpha-1_4 glucan phosphorylase OS=Rattus norvegicus GN=Pygm PE=1 SV=1		1	0.39
A0A0G2K4M6	2	Actin_ aortic smooth muscle OS=Rattus norvegicus GN=Acta2 PE=3 SV=1		1	0.4
A0A0G2K793	2	Heat shock protein HSP 90-beta OS=Rattus norvegicus GN=Hsp90ab1 PE=1 SV=1		0.980199	0.41
D3ZWE0	2	Histone H2A OS=Rattus norvegicus GN=Hist2h2ab PE=3 SV=1		0.99005	0.42
A0A0G2JYY8	2	Uncharacterized protein OS=Rattus norvegicus PE=1 SV=1		0.951229	0.45
P63269	2	Actin_ gamma-enteric smooth muscle OS=Rattus norvegicus GN=Actg2 PE=2 SV=1		1	0.46
A0A0A0MXW3	2	Histone H2A OS=Rattus norvegicus GN=H2afz PE=3 SV=1		0.99005	0.46
D4AEC0	2	Histone H2A OS=Rattus norvegicus GN=H2afv PE=3 SV=1		0.99005	0.47
P0C0S7	2	Histone H2A.Z OS=Rattus norvegicus GN=H2afz PE=1 SV=2		0.99005	0.48
P10719	2	ATP synthase subunit beta_ mitochondrial OS=Rattus norvegicus GN=Atp5b PE=1 SV=2		0.980199	0.49
C0JPT7	1	Filamin A OS=Rattus norvegicus GN=Flna PE=1 SV=1		1	0.5
P04905	1	Glutathione S-transferase Mu 1 OS=Rattus norvegicus GN=Gstm1 PE=1 SV=2		0.951229	0.5
G3V983	1	Glutathione S-transferase OS=Rattus norvegicus GN=Gstm1 PE=1 SV=2		1	0.5
M0R8M9	2	Heat shock cognate 71 kDa protein OS=Rattus norvegicus GN=Hspa8 PE=3 SV=2		1	0.5
O88767	2	Protein DJ-1 OS=Rattus norvegicus GN=Park7 PE=1 SV=1		1.0202	0.5
P31977	1	Ezrin OS=Rattus norvegicus GN=Ezr PE=1 SV=3		1.01005	0.51
P09812	2	Glycogen phosphorylase_ muscle form OS=Rattus norvegicus GN=Pygm PE=1 SV=5		1	0.51
Q5BKC3	2	Park7 protein OS=Rattus norvegicus GN=Park7 PE=1 SV=1		1	0.52
P63018	2	Heat shock cognate 71 kDa protein OS=Rattus norvegicus GN=Hspa8 PE=1 SV=1		1.01005	0.53
F1M5A1	2	Calreticulin 4 OS=Rattus norvegicus GN=Calr4 PE=1 SV=2		1.05127	0.55
Q6AYZ1	1	Tubulin alpha-1C chain OS=Rattus norvegicus GN=Tuba1c PE=1 SV=1		1.03045	0.55
D3ZYM6	2	Calreticulin 4 OS=Rattus norvegicus GN=Calr4 PE=1 SV=2		1.05127	0.56
Q5XHZ0	2	Heat shock protein 75 kDa_ mitochondrial OS=Rattus norvegicus GN=Trap1 PE=1 SV=1		1.0202	0.56
P07861	1	Neprilysin OS=Rattus norvegicus GN=Mme PE=1 SV=2		0.99005	0.56
A0A0H2UHM7	1	Tubulin alpha chain OS=Rattus norvegicus GN=LOC100909441 PE=3 SV=1		1	0.56
P68035	2	Actin_ alpha cardiac muscle 1 OS=Rattus norvegicus GN=Actc1 PE=2 SV=1		1	0.57
G3V6D3	2	ATP synthase subunit beta OS=Rattus norvegicus GN=Atp5b PE=1 SV=1		1.04081	0.57
P55063	2	Heat shock 70 kDa protein 1-like OS=Rattus norvegicus GN=Hspa1l PE=2 SV=2		1.0202	0.57
D3ZXP3	2	Histone H2A OS=Rattus norvegicus GN=H2afx PE=1 SV=1		1.01005	0.57
P68136	2	Actin_ alpha skeletal muscle OS=Rattus norvegicus GN=Acta1 PE=1 SV=1		1.01005	0.58
P62738	2	Actin_ aortic smooth muscle OS=Rattus norvegicus GN=Acta2 PE=2 SV=1		1	0.58
Q00729	2	Histone H2B type 1-A OS=Rattus norvegicus GN=Hist1h2ba PE=1 SV=2		0.951229	0.62
P62963	2	Profilin-1 OS=Rattus norvegicus GN=Pfn1 PE=1 SV=2		1.05127	0.63
P0DMW1	2	Heat shock 70 kDa protein 1B OS=Rattus norvegicus GN=Hspa1b PE=2 SV=1		1.03045	0.64
P0DMW0	2	Heat shock 70 kDa protein 1A OS=Rattus norvegicus GN=Hspa1a PE=2 SV=1		1.04081	0.66
P09811	2	Glycogen phosphorylase_ liver form OS=Rattus norvegicus GN=Pygl PE=1 SV=5		1.01005	0.68
Q63862	1	Myosin-11 (Fragments) OS=Rattus norvegicus GN=Myh11 PE=1 SV=3		1.2214	0.73
E9PTU4	1	Myosin-11 OS=Rattus norvegicus GN=Myh11 PE=1 SV=2		1.20925	0.73
A0A0G2K890	1	Ezrin OS=Rattus norvegicus GN=Ezr PE=1 SV=1		1.10517	0.74
A0A0H2UHX5	1	Neprilysin OS=Rattus norvegicus GN=Mme PE=4 SV=1		1.16183	0.74
P82995	2	Heat shock protein HSP 90-alpha OS=Rattus norvegicus GN=Hsp90aa1 PE=1 SV=3		1.08329	0.76
F1M927	2	Ribosomal protein S27a_ pseudogene 5 OS=Rattus norvegicus GN=Rps27a-ps5 PE=4 SV=2		1.10517	0.78
A0A0G2JXJ9	2	Keratin_ type I cytoskeletal 14 OS=Rattus norvegicus GN=Krt14 PE=1 SV=1		1.27125	0.79
B1WC26	2	N-acetylneuraminate synthase OS=Rattus norvegicus GN=Nans PE=1 SV=1		1.08329	0.79
Q63910	2	Alpha globin OS=Rattus norvegicus GN=Hba-a3 PE=1 SV=2		1.1853	0.8
A0A0G2K6S9	1	Myosin-11 OS=Rattus norvegicus GN=Myh11 PE=1 SV=1		1.23368	0.8
A0A0G2K4I4	2	Endoplasmin OS=Rattus norvegicus GN=Hsp90b1 PE=1 SV=1		1.15027	0.82
G3V6Y6	2	Alpha-1_4 glucan phosphorylase OS=Rattus norvegicus GN=Pygb PE=1 SV=2		1.0202	0.85
G3V8R3	2	Globin e1 OS=Rattus norvegicus GN=Hbz PE=3 SV=1		1.24608	0.85
P62632	2	Elongation factor 1-alpha 2 OS=Rattus norvegicus GN=Eef1a2 PE=1 SV=1		1.11628	0.86
F1LXL7	2	Glutathione S-transferase_ mu 6-like OS=Rattus norvegicus GN=Gstm6l PE=4 SV=3		1.27125	0.87
P34058	2	Heat shock protein HSP 90-beta OS=Rattus norvegicus GN=Hsp90ab1 PE=1 SV=4		1.09417	0.87
A0A0A0MY09	2	Endoplasmin OS=Rattus norvegicus GN=Hsp90b1 PE=1 SV=1		1.1853	0.89
Q9Z1B2	2	Glutathione S-transferase Mu 5 OS=Rattus norvegicus GN=Gstm5 PE=1 SV=3		1.28403	0.89
P62630	2	Elongation factor 1-alpha 1 OS=Rattus norvegicus GN=Eef1a1 PE=2 SV=1		1.1275	0.9
M0R757	2	Elongation factor 1-alpha OS=Rattus norvegicus GN=LOC100360413 PE=3 SV=1		1.1275	0.91
Q66HD0	2	Endoplasmin OS=Rattus norvegicus GN=Hsp90b1 PE=1 SV=2		1.27125	0.92
P53534	2	Glycogen phosphorylase_ brain form (Fragment) OS=Rattus norvegicus GN=Pygb PE=1 SV=3		1.03045	0.93
A0A140TAF0	2	RCG62531_ isoform CRA_g OS=Rattus norvegicus GN=Tpm3 PE=1 SV=1		1.39097	0.94
D3ZVQ8	2	Glutathione S-transferase_ mu 6-like OS=Rattus norvegicus GN=Gstm6 PE=4 SV=3		1.2586	0.95
Q08290	1	Calponin-1 OS=Rattus norvegicus GN=Cnn1 PE=1 SV=1		2.01375	0.96
P04636	2	Malate dehydrogenase_ mitochondrial OS=Rattus norvegicus GN=Mdh2 PE=1 SV=2		1.37713	0.96
P04785	2	Protein disulfide-isomerase OS=Rattus norvegicus GN=P4hb PE=1 SV=2		1.1853	0.96
A0A0G2K6L4	2	Glutathione S-transferase_ mu 6 (Predicted)_ isoform CRA_a OS=Rattus norvegicus GN=Gstm6l PE=1 SV=1		1.29693	0.97
A0A0G2JZ09	2	Glutathione S-transferase_ mu 6-like OS=Rattus norvegicus GN=Gstm6l PE=1 SV=1		1.28403	0.98
E9PTV9	2	Glyceraldehyde-3-phosphate dehydrogenase OS=Rattus norvegicus GN=RGD1562758 PE=1 SV=2		1.69893	0.98
Q63081	2	Protein disulfide-isomerase A6 OS=Rattus norvegicus GN=Pdia6 PE=1 SV=2		1.13883	0.98
F1LUV3	2	Similar to glyceraldehyde-3-phosphate dehydrogenase OS=Rattus norvegicus GN=LOC291543 PE=1 SV=3		1.50682	0.98
P58775	2	Tropomyosin beta chain OS=Rattus norvegicus GN=Tpm2 PE=1 SV=1		1.47698	0.98
P18418	2	Calreticulin OS=Rattus norvegicus GN=Calr PE=1 SV=1		1.23368	0.99
A0A0G2JSZ5	2	Protein disulfide-isomerase A6 OS=Rattus norvegicus GN=Pdia6 PE=1 SV=1		1.16183	0.99
Q91XN6	2	Tropomyosin 1_ alpha_ isoform CRA_h OS=Rattus norvegicus GN=Tpm1 PE=1 SV=1		1.53726	0.99
A0A0G2JX64	2	Tropomyosin 1_ alpha_ isoform CRA_i OS=Rattus norvegicus GN=Tpm1 PE=1 SV=1		1.49182	0.99
A0A0G2JSQ4	2	Tropomyosin 1_ alpha_ isoform CRA_p OS=Rattus norvegicus GN=Tpm1 PE=1 SV=1		1.47698	0.99
A0A0G2K7F7	2	Tropomyosin alpha-1 chain OS=Rattus norvegicus GN=Tpm1 PE=1 SV=1		1.47698	0.99
Q63610	2	Tropomyosin alpha-3 chain OS=Rattus norvegicus GN=Tpm3 PE=1 SV=2		1.46228	0.99
A0A0G2K2G8	2	Tropomyosin alpha-4 chain OS=Rattus norvegicus GN=Tpm4 PE=1 SV=1		1.49182	0.99
P06761	2	78 kDa glucose-regulated protein OS=Rattus norvegicus GN=Hspa5 PE=1 SV=1		1.2586	1
Q63607	2	Alpha-tropomyosin 3 OS=Rattus norvegicus GN=Tpm1 PE=1 SV=1		1.50682	1
A0A0G2JSU6	2	Cystatin OS=Rattus norvegicus GN=Andpro PE=3 SV=1		4.57223	1
P22282	2	Cystatin-related protein 1 OS=Rattus norvegicus GN=Andpro PE=1 SV=1		2.01375	1
P36375	2	Glandular kallikrein-10 OS=Rattus norvegicus GN=Klk10 PE=1 SV=2		1.58407	1
P36376	2	Glandular kallikrein-12_ submandibular/renal OS=Rattus norvegicus GN=Klk12 PE=2 SV=1		1.59999	1
P36373	2	Glandular kallikrein-7_ submandibular/renal OS=Rattus norvegicus GN=Klk7 PE=1 SV=1		1.46228	1
Q62669	2	Globin a1 OS=Rattus norvegicus GN=LOC103694855 PE=1 SV=1		6.75309	1
P08010	2	Glutathione S-transferase Mu 2 OS=Rattus norvegicus GN=Gstm2 PE=1 SV=2		1.93479	1
A0A0G2K4U2	2	Glutathione S-transferase Mu 2 OS=Rattus norvegicus GN=Gstm7 PE=1 SV=1		1.99372	1
Q5BK56	2	Glutathione S-transferase OS=Rattus norvegicus GN=Gstm4 PE=1 SV=1		1.82212	1
P08009	2	Glutathione S-transferase Yb-3 OS=Rattus norvegicus GN=Gstm3 PE=1 SV=2		1.82212	1
A0A0G2JTW9	2	Hemoglobin_ beta adult major chain OS=Rattus norvegicus GN=Hbb-b1 PE=1 SV=1		6.5535	1
G3V9C0	2	Histone H2A OS=Rattus norvegicus GN=Hist1h2ac PE=3 SV=1		1.1853	1
Q6I8Q6	2	Histone H2A OS=Rattus norvegicus GN=Hist1h2af PE=3 SV=1		1.19722	1
D3ZVK7	2	Histone H2A OS=Rattus norvegicus GN=Hist1h2ak PE=3 SV=1		1.20925	1
D4ACV3	2	Histone H2A OS=Rattus norvegicus GN=Hist2h2ac PE=3 SV=2		1.19722	1
M0RCL5	2	Histone H2A OS=Rattus norvegicus GN=LOC100910554 PE=1 SV=1		1.19722	1
M0RDM4	2	Histone H2A OS=Rattus norvegicus GN=LOC680322 PE=3 SV=1		1.19722	1
P02262	2	Histone H2A type 1 OS=Rattus norvegicus PE=1 SV=2		1.1853	1
P0C169	2	Histone H2A type 1-C OS=Rattus norvegicus PE=1 SV=2		1.20925	1
P0C170	2	Histone H2A type 1-E OS=Rattus norvegicus PE=1 SV=2		1.20925	1
Q64598	2	Histone H2A type 1-F OS=Rattus norvegicus PE=3 SV=3		1.20925	1
P0CC09	2	Histone H2A type 2-A OS=Rattus norvegicus GN=Hist2h2aa3 PE=1 SV=1		1.19722	1
Q4FZT6	2	Histone H2A type 3 OS=Rattus norvegicus PE=2 SV=3		1.19722	1
Q00728	2	Histone H2A type 4 OS=Rattus norvegicus PE=2 SV=2		1.20925	1
A9UMV8	2	Histone H2A.J OS=Rattus norvegicus GN=H2afj PE=2 SV=1		1.20925	1
Q63617	2	Hypoxia up-regulated protein 1 OS=Rattus norvegicus GN=Hyou1 PE=1 SV=1		15.7998	1
G3V8H1	2	Kallikrein 1 OS=Rattus norvegicus GN=Klk1 PE=3 SV=1		1.33643	1
A0A0G2JX00	2	Kallikrein 1 OS=Rattus norvegicus GN=Klk1c9 PE=3 SV=1		1.53726	1
A0A0G2K6G1	2	Kallikrein 1 OS=Rattus norvegicus GN=Klk1c9 PE=3 SV=1		1.47698	1
F1LNH4	2	Kallikrein 1-related peptidase C12 OS=Rattus norvegicus GN=Klk1c12 PE=3 SV=1		1.58407	1
A0A0G2K797	2	Kallikrein 1-related peptidase C6 OS=Rattus norvegicus GN=Klk1c6 PE=3 SV=1		1.58407	1
W4VSR8	2	Kallikrein 1-related peptidase C6 OS=Rattus norvegicus GN=Klk1c6 PE=3 SV=2		1.58407	1
G3V8G8	2	Kallikrein 1-related peptidase C8 OS=Rattus norvegicus GN=Klk1c8 PE=3 SV=1		1.37713	1
A0A0G2JSS8	2	Peroxiredoxin 5_ isoform CRA_c OS=Rattus norvegicus GN=Prdx5 PE=1 SV=1		1.29693	1
Q9R063	2	Peroxiredoxin-5_ mitochondrial OS=Rattus norvegicus GN=Prdx5 PE=1 SV=1		1.30996	1
P15399	2	Probasin OS=Rattus norvegicus GN=Pbsn PE=1 SV=1		4.85496	1
P36374	2	Prostatic glandular kallikrein-6 OS=Rattus norvegicus GN=Klk6 PE=3 SV=1		1.39097	1
M0RDZ8	2	Prostatic glandular kallikrein-6-like OS=Rattus norvegicus GN=LOC103690048 PE=3 SV=1		1.33643	1
P08723	2	Prostatic spermine-binding protein OS=Rattus norvegicus GN=Sbp PE=1 SV=1		2.88637	1
A0A0G2K4C9	2	Prostatic spermine-binding protein OS=Rattus norvegicus GN=Sbp PE=4 SV=1		2.88637	1
A0A0G2JTU6	2	Prostatic spermine-binding protein OS=Rattus norvegicus GN=Sbp PE=4 SV=1		2.91538	1
A0A0G2K176	2	Prostatic spermine-binding protein OS=Rattus norvegicus GN=Sbp PE=4 SV=1		2.88637	1
P02781	2	Prostatic steroid-binding protein C2 OS=Rattus norvegicus GN=Psbpc2 PE=1 SV=1		1.16183	1
P02780	2	Secretoglobin family 2A member 2 OS=Rattus norvegicus GN=Scgb2a2 PE=1 SV=1		1.33643	1
D3Z9U8	2	Similar to S100 calcium-binding protein_ ventral prostate OS=Rattus norvegicus GN=RGD1562234 PE=4 SV=1		1.28403	1
A0A0G2K7Y9	2	Spermine-binding protein-like OS=Rattus norvegicus GN=Sbpl PE=4 SV=1		2.97427	1
A0A0G2JZ90	2	Spermine-binding protein-like OS=Rattus norvegicus GN=Sbpl PE=4 SV=1		2.94468	1
P07647	2	Submandibular glandular kallikrein-9 OS=Rattus norvegicus GN=Klk9 PE=1 SV=1		1.56831	1
P11232	2	Thioredoxin OS=Rattus norvegicus GN=Txn PE=1 SV=2		1.87761	1
Q923Z2	2	Tropomyosin 1_ alpha_ isoform CRA_a OS=Rattus norvegicus GN=Tpm1 PE=1 SV=1		1.46228	1
P04692	2	Tropomyosin alpha-1 chain OS=Rattus norvegicus GN=Tpm1 PE=1 SV=3		1.47698	1
P09495	2	Tropomyosin alpha-4 chain OS=Rattus norvegicus GN=Tpm4 PE=1 SV=3		1.49182	1
F1MAE5	1	Uncharacterized protein OS=Rattus norvegicus PE=1 SV=3		10.1757	1
A0A0G2JX19	2	Uncharacterized protein OS=Rattus norvegicus PE=3 SV=1		1.58407	1
D4A5P8	1	WAP four-disulfide core domain 3 OS=Rattus norvegicus GN=Wfdc3 PE=4 SV=1		1.64872	1
Q562C9	1	1_2-dihydroxy-3-keto-5-methylthiopentene dioxygenase OS=Rattus norvegicus GN=Adi1 PE=2 SV=1	CTR	CTR	CTR
Q9WVC7	1	A-kinase anchor protein 6 OS=Rattus norvegicus GN=Akap6 PE=1 SV=1	CTR	CTR	CTR
P00330	1	Alcohol dehydrogenase 1 OS=Saccharomyces cerevisiae (strain ATCC 204508 / S288c) GN=ADH1 PE=1 SV=5	CTR	CTR	CTR
P11884	1	Aldehyde dehydrogenase_ mitochondrial OS=Rattus norvegicus GN=Aldh2 PE=1 SV=1	CTR	CTR	CTR
F1LN88	1	Aldehyde dehydrogenase_ mitochondrial OS=Rattus norvegicus GN=Aldh2 PE=1 SV=2	CTR	CTR	CTR
A0A0G2JZ73	1	Alpha-1-antiproteinase OS=Rattus norvegicus GN=Serpina1 PE=1 SV=1	CTR	CTR	CTR
A0A0G2JY31	1	Alpha-1-antiproteinase OS=Rattus norvegicus GN=Serpina1 PE=1 SV=1	CTR	CTR	CTR
P17475	1	Alpha-1-antiproteinase OS=Rattus norvegicus GN=Serpina1 PE=1 SV=2	CTR	CTR	CTR
F1MAK0	1	Angiogenic factor with G patch and FHA domains 1 OS=Rattus norvegicus GN=Aggf1 PE=4 SV=3	CTR	CTR	CTR
P00762	2	Anionic trypsin-1 OS=Rattus norvegicus GN=Prss1 PE=1 SV=1	CTR	CTR	CTR
P07150	2	Annexin A1 OS=Rattus norvegicus GN=Anxa1 PE=1 SV=2	CTR	CTR	CTR
Q6P691	1	C2 calcium-dependent domain-containing 2 OS=Rattus norvegicus GN=C2cd2 PE=1 SV=1	CTR	CTR	CTR
A0A0G2JU40	1	C2 calcium-dependent domain-containing 2 OS=Rattus norvegicus GN=C2cd2 PE=1 SV=1	CTR	CTR	CTR
M0RBJ7	2	Complement C3 OS=Rattus norvegicus GN=C3 PE=1 SV=1	CTR	CTR	CTR
M0RBF1	2	Complement C3 OS=Rattus norvegicus GN=C3 PE=1 SV=1	CTR	CTR	CTR
P47875	2	Cysteine and glycine-rich protein 1 OS=Rattus norvegicus GN=Csrp1 PE=1 SV=2	CTR	CTR	CTR
D4A1R0	1	DEAH-box helicase 37 OS=Rattus norvegicus GN=Dhx37 PE=1 SV=1	CTR	CTR	CTR
Q5XFV4	1	Fabp4 protein OS=Rattus norvegicus GN=Fabp4 PE=1 SV=1	CTR	CTR	CTR
A0A0G2K586	1	Fatty acid-binding protein_ adipocyte OS=Rattus norvegicus GN=Fabp4 PE=1 SV=1	CTR	CTR	CTR
P70623	1	Fatty acid-binding protein_ adipocyte OS=Rattus norvegicus GN=Fabp4 PE=1 SV=3	CTR	CTR	CTR
P02680	2	Fibrinogen gamma chain OS=Rattus norvegicus GN=Fgg PE=1 SV=3	CTR	CTR	CTR
P09117	2	Fructose-bisphosphate aldolase C OS=Rattus norvegicus GN=Aldoc PE=1 SV=3	CTR	CTR	CTR
Q6AY07	2	Fructose-bisphosphate aldolase OS=Rattus norvegicus GN=Aldoart2 PE=2 SV=1	CTR	CTR	CTR
A0A0G2K3Q6	2	Fructose-bisphosphate aldolase OS=Rattus norvegicus GN=Aldoc PE=1 SV=1	CTR	CTR	CTR
D3ZHY4	1	Glycine-N-acyltransferase-like 3 OS=Rattus norvegicus GN=Glyatl3 PE=4 SV=1	CTR	CTR	CTR
Q53E76	1	Glycosyltransferase-like domain-containing protein 1 OS=Rattus norvegicus GN=Gtdc1 PE=2 SV=1	CTR	CTR	CTR
A0A096MJI4	1	GRB10-interacting GYF protein 2 (Fragment) OS=Rattus norvegicus GN=Gigyf2 PE=1 SV=1	CTR	CTR	CTR
A0A0G2K477	2	Immunoglobulin heavy constant mu OS=Rattus norvegicus GN=Ighm PE=4 SV=1	CTR	CTR	CTR
Q6P6T9	1	Importin subunit alpha OS=Rattus norvegicus GN=Kpna2 PE=2 SV=1	CTR	CTR	CTR
M0R7I0	1	Importin subunit alpha OS=Rattus norvegicus GN=LOC100359600 PE=3 SV=1	CTR	CTR	CTR
F1M5A4	2	Katanin p60 ATPase-containing subunit A-like 2 OS=Rattus norvegicus GN=Katnal2 PE=3 SV=3	CTR	CTR	CTR
G3V8L3	1	Lamin A_ isoform CRA_b OS=Rattus norvegicus GN=Lmna PE=1 SV=1	CTR	CTR	CTR
Q6P6U3	1	Lmna protein OS=Rattus norvegicus GN=Lmna PE=1 SV=1	CTR	CTR	CTR
D4A5D4	1	Microtubule crosslinking factor 1 OS=Rattus norvegicus GN=Mtcl1 PE=1 SV=3	CTR	CTR	CTR
A0A1W2Q6E9	1	Moesin OS=Rattus norvegicus GN=Msn PE=1 SV=1	CTR	CTR	CTR
A0A096MK30	1	Moesin OS=Rattus norvegicus GN=Msn PE=1 SV=1	CTR	CTR	CTR
O35763	1	Moesin OS=Rattus norvegicus GN=Msn PE=1 SV=3	CTR	CTR	CTR
A0A0G2K0Q7	1	Myosin light chain kinase OS=Rattus norvegicus GN=Mylk PE=1 SV=1	CTR	CTR	CTR
D3ZFU9	1	Myosin light chain kinase OS=Rattus norvegicus GN=Mylk PE=1 SV=2	CTR	CTR	CTR
G3V9Y1	1	Myosin_ heavy polypeptide 10_ non-muscle_ isoform CRA_b OS=Rattus norvegicus GN=Myh10 PE=1 SV=1	CTR	CTR	CTR
Q9JLT0	1	Myosin-10 OS=Rattus norvegicus GN=Myh10 PE=1 SV=1	CTR	CTR	CTR
G3V8R1	1	Nucleobindin 2_ isoform CRA_b OS=Rattus norvegicus GN=Nucb2 PE=1 SV=1	CTR	CTR	CTR
Q9JI85	1	Nucleobindin-2 OS=Rattus norvegicus GN=Nucb2 PE=1 SV=1	CTR	CTR	CTR
M0RCZ9	2	Peptidyl-prolyl cis-trans isomerase OS=Rattus norvegicus GN=Ppial4g PE=1 SV=2	CTR	CTR	CTR
D3ZQ57	1	Plexin B2 OS=Rattus norvegicus GN=Plxnb2 PE=1 SV=1	CTR	CTR	CTR
P48679	1	Prelamin-A/C OS=Rattus norvegicus GN=Lmna PE=1 SV=1	CTR	CTR	CTR
A0A0G2K3R2	1	Prelamin-A/C OS=Rattus norvegicus GN=Lmna PE=1 SV=1	CTR	CTR	CTR
A0A0G2JTC5	1	Prelamin-A/C OS=Rattus norvegicus GN=Lmna PE=1 SV=1	CTR	CTR	CTR
A0A1B0GWU9	1	Prelamin-A/C OS=Rattus norvegicus GN=Lmna PE=1 SV=1	CTR	CTR	CTR
G3V9W4	1	Probable Xaa-Pro aminopeptidase 3 OS=Rattus norvegicus GN=Xpnpep3 PE=1 SV=1	CTR	CTR	CTR
B5DEQ3	1	Probable Xaa-Pro aminopeptidase 3 OS=Rattus norvegicus GN=Xpnpep3 PE=1 SV=1	CTR	CTR	CTR
A0A0G2JVG3	1	Pyruvate kinase OS=Rattus norvegicus GN=Pkm PE=1 SV=1	CTR	CTR	CTR
M0RD14	1	Pyruvate kinase OS=Rattus norvegicus GN=Pkm PE=3 SV=2	CTR	CTR	CTR
P11980	1	Pyruvate kinase PKM OS=Rattus norvegicus GN=Pkm PE=1 SV=3	CTR	CTR	CTR
G3V8H6	2	RCG27439 OS=Rattus norvegicus GN=Zfp606 PE=4 SV=1	CTR	CTR	CTR
Q498M9	1	Similar to glyceraldehyde-3-phosphate dehydrogenase OS=Rattus norvegicus GN=LOC303448 PE=1 SV=1	CTR	CTR	CTR
A0A0G2K896	2	Similar to RIKEN cDNA 1300017J02 OS=Rattus norvegicus GN=RGD1310507 PE=1 SV=1	CTR	CTR	CTR
E9PST1	2	Similar to RIKEN cDNA 1300017J02 OS=Rattus norvegicus GN=RGD1310507 PE=1 SV=3	CTR	CTR	CTR
D3ZBV9	1	Similar to YEATS domain containing 2 (Predicted) OS=Rattus norvegicus GN=Yeats2 PE=1 SV=1	CTR	CTR	CTR
D4A6T1	2	Spermatogenesis associated 5 (Predicted)_ isoform CRA_a OS=Rattus norvegicus GN=Spata5 PE=1 SV=1	CTR	CTR	CTR
A0A0G2K0I1	2	Spermatogenesis-associated 5 OS=Rattus norvegicus GN=Spata5 PE=1 SV=1	CTR	CTR	CTR
P07632	2	Superoxide dismutase [Cu-Zn] OS=Rattus norvegicus GN=Sod1 PE=1 SV=2	CTR	CTR	CTR
B4F7C2	2	Tubulin beta chain OS=Rattus norvegicus GN=Tubb4a PE=1 SV=1	CTR	CTR	CTR
G3V7C6	2	Tubulin beta chain OS=Rattus norvegicus GN=Tubb4b PE=1 SV=2	CTR	CTR	CTR
Q4QQV0	2	Tubulin beta chain OS=Rattus norvegicus GN=Tubb6 PE=1 SV=1	CTR	CTR	CTR
P85108	2	Tubulin beta-2A chain OS=Rattus norvegicus GN=Tubb2a PE=1 SV=1	CTR	CTR	CTR
Q3KRE8	2	Tubulin beta-2B chain OS=Rattus norvegicus GN=Tubb2b PE=1 SV=1	CTR	CTR	CTR
Q4QRB4	2	Tubulin beta-3 chain OS=Rattus norvegicus GN=Tubb3 PE=1 SV=1	CTR	CTR	CTR
Q6P9T8	2	Tubulin beta-4B chain OS=Rattus norvegicus GN=Tubb4b PE=1 SV=1	CTR	CTR	CTR
P69897	2	Tubulin beta-5 chain OS=Rattus norvegicus GN=Tubb5 PE=1 SV=1	CTR	CTR	CTR
M0R8V0	1	UHRF1-binding protein 1-like OS=Rattus norvegicus GN=LOC100910056 PE=1 SV=2	CTR	CTR	CTR
F1M2N4	1	Uncharacterized protein OS=Rattus norvegicus PE=1 SV=2	CTR	CTR	CTR
A0A0G2K7R1	2	Uncharacterized protein OS=Rattus norvegicus PE=3 SV=1	CTR	CTR	CTR
F1M4G6	1	Uncharacterized protein OS=Rattus norvegicus PE=3 SV=1	CTR	CTR	CTR
D3ZEN2	1	Uncharacterized protein OS=Rattus norvegicus PE=4 SV=2	CTR	CTR	CTR
Q5FVN8	1	WD repeat_ SAM and U-box domain-containing protein 1 OS=Rattus norvegicus GN=Wdsub1 PE=2 SV=1	CTR	CTR	CTR
A0A0H2UHE3	1	WD repeat_ SAM and U-box domain-containing protein 1 OS=Rattus norvegicus GN=Wdsub1 PE=4 SV=1	CTR	CTR	CTR
A0A0G2K765	2	Zinc finger protein 606 OS=Rattus norvegicus GN=Zfp606 PE=4 SV=1	CTR	CTR	CTR
P62260	2	14-3-3 protein epsilon OS=Rattus norvegicus GN=Ywhae PE=1 SV=1	GLLP	GLLP	GLLP
A0A0G2JV65	1	14-3-3 protein zeta/delta OS=Rattus norvegicus GN=Ywhaz PE=1 SV=1	GLLP	GLLP	GLLP
P63102	1	14-3-3 protein zeta/delta OS=Rattus norvegicus GN=Ywhaz PE=1 SV=1	GLLP	GLLP	GLLP
D3ZJT4	2	60S acidic ribosomal protein P0 OS=Rattus norvegicus GN=RGD1564469 PE=3 SV=3	GLLP	GLLP	GLLP
P19945	2	60S acidic ribosomal protein P0 OS=Rattus norvegicus GN=Rplp0 PE=1 SV=2	GLLP	GLLP	GLLP
Q6IMA9	1	ADP-ribosylation factor-like 9 OS=Rattus norvegicus GN=Arl9 PE=2 SV=1	GLLP	GLLP	GLLP
F1LP05	2	ATP synthase subunit alpha OS=Rattus norvegicus GN=Atp5a1 PE=1 SV=1	GLLP	GLLP	GLLP
P15999	2	ATP synthase subunit alpha_ mitochondrial OS=Rattus norvegicus GN=Atp5a1 PE=1 SV=2	GLLP	GLLP	GLLP
P27139	2	Carbonic anhydrase 2 OS=Rattus norvegicus GN=Ca2 PE=1 SV=2	GLLP	GLLP	GLLP
M0R3X6	2	Carbonyl reductase [NADPH] 1 OS=Rattus norvegicus GN=Cbr1 PE=1 SV=1	GLLP	GLLP	GLLP
A0A096MJ24	2	Carbonyl reductase [NADPH] 1 OS=Rattus norvegicus GN=Cbr1 PE=1 SV=1	GLLP	GLLP	GLLP
A0A0G2JSV2	2	Carbonyl reductase [NADPH] 1 OS=Rattus norvegicus GN=Cbr1 PE=1 SV=1	GLLP	GLLP	GLLP
P47727	2	Carbonyl reductase [NADPH] 1 OS=Rattus norvegicus GN=Cbr1 PE=1 SV=2	GLLP	GLLP	GLLP
A0A0G2K658	2	Carbonyl reductase [NADPH] 1 OS=Rattus norvegicus GN=LOC102556347 PE=1 SV=1	GLLP	GLLP	GLLP
Q6P725	1	Desmin OS=Rattus norvegicus GN=Des PE=1 SV=1	GLLP	GLLP	GLLP
P48675	1	Desmin OS=Rattus norvegicus GN=Des PE=1 SV=2	GLLP	GLLP	GLLP
B0BN47	2	Glutathione S-transferase OS=Rattus norvegicus GN=Gstm6 PE=1 SV=1	GLLP	GLLP	GLLP
P04906	1	Glutathione S-transferase P OS=Rattus norvegicus GN=Gstp1 PE=1 SV=2	GLLP	GLLP	GLLP
Q63942	2	GTP-binding protein Rab-3D OS=Rattus norvegicus GN=Rab3d PE=1 SV=2	GLLP	GLLP	GLLP
Q66H30	1	Gypsy retrotransposon integrase-like protein 1 OS=Rattus norvegicus GN=GIN1 PE=2 SV=1	GLLP	GLLP	GLLP
M0R6X5	2	Histone H2A OS=Rattus norvegicus PE=3 SV=2	GLLP	GLLP	GLLP
F1LWJ6	2	Myosin IIIB OS=Rattus norvegicus GN=Myo3b PE=4 SV=3	GLLP	GLLP	GLLP
Q6MG75	1	Negative elongation factor complex member E OS=Rattus norvegicus GN=Nelfe PE=1 SV=1	GLLP	GLLP	GLLP
P19527	2	Neurofilament light polypeptide OS=Rattus norvegicus GN=Nefl PE=1 SV=3	GLLP	GLLP	GLLP
Q5RKJ9	2	RAB10_ member RAS oncogene family OS=Rattus norvegicus GN=Rab10 PE=1 SV=1	GLLP	GLLP	GLLP
B0BMW0	2	RAB14_ member RAS oncogene family OS=Rattus norvegicus GN=Rab14 PE=1 SV=1	GLLP	GLLP	GLLP
A0A0G2K235	2	RAB1A_ member RAS oncogene family OS=Rattus norvegicus GN=Rab1a PE=1 SV=1	GLLP	GLLP	GLLP
E9PU16	2	RAB1A_ member RAS oncogene family OS=Rattus norvegicus GN=Rab1a PE=1 SV=2	GLLP	GLLP	GLLP
G3V6H0	2	RAB1B_ member RAS oncogene family-like OS=Rattus norvegicus GN=LOC100363782 PE=4 SV=1	GLLP	GLLP	GLLP
A0A0G2JTT4	2	RAB30_ member RAS oncogene family OS=Rattus norvegicus GN=Rab30 PE=1 SV=1	GLLP	GLLP	GLLP
F1LW77	2	RAB33B_ member RAS oncogene family OS=Rattus norvegicus GN=Rab33b PE=1 SV=2	GLLP	GLLP	GLLP
D4A0G7	2	RAB37_ member RAS oncogene family OS=Rattus norvegicus GN=Rab37 PE=4 SV=1	GLLP	GLLP	GLLP
D3ZZP2	2	RAB39_ member RAS oncogene family (Predicted) OS=Rattus norvegicus GN=Rab39a PE=4 SV=1	GLLP	GLLP	GLLP
A0A0G2K201	2	RAB42_ member RAS oncogene family OS=Rattus norvegicus GN=Rab42 PE=4 SV=1	GLLP	GLLP	GLLP
A0A0G2JT78	2	RAB6B_ member RAS oncogene family OS=Rattus norvegicus GN=Rab6b PE=4 SV=1	GLLP	GLLP	GLLP
F1LVC3	2	RAB6B_ member RAS oncogene family OS=Rattus norvegicus GN=Rab6b PE=4 SV=2	GLLP	GLLP	GLLP
P35281	2	Ras-related protein Rab-10 OS=Rattus norvegicus GN=Rab10 PE=1 SV=1	GLLP	GLLP	GLLP
P35284	2	Ras-related protein Rab-12 OS=Rattus norvegicus GN=Rab12 PE=1 SV=2	GLLP	GLLP	GLLP
D4A376	2	Ras-related protein Rab-12 OS=Rattus norvegicus GN=Rab12 PE=1 SV=3	GLLP	GLLP	GLLP
P35286	2	Ras-related protein Rab-13 OS=Rattus norvegicus GN=Rab13 PE=1 SV=2	GLLP	GLLP	GLLP
A0A1B0GWR3	2	Ras-related protein Rab-14 (Fragment) OS=Rattus norvegicus GN=Rab14 PE=1 SV=1	GLLP	GLLP	GLLP
P61107	2	Ras-related protein Rab-14 OS=Rattus norvegicus GN=Rab14 PE=1 SV=3	GLLP	GLLP	GLLP
P35289	2	Ras-related protein Rab-15 OS=Rattus norvegicus GN=Rab15 PE=2 SV=1	GLLP	GLLP	GLLP
Q6NYB7	2	Ras-related protein Rab-1A OS=Rattus norvegicus GN=Rab1A PE=1 SV=3	GLLP	GLLP	GLLP
P10536	2	Ras-related protein Rab-1B OS=Rattus norvegicus GN=Rab1b PE=1 SV=1	GLLP	GLLP	GLLP
P51156	2	Ras-related protein Rab-26 OS=Rattus norvegicus GN=Rab26 PE=2 SV=2	GLLP	GLLP	GLLP
Q5U316	2	Ras-related protein Rab-35 OS=Rattus norvegicus GN=Rab35 PE=1 SV=1	GLLP	GLLP	GLLP
P63012	2	Ras-related protein Rab-3A OS=Rattus norvegicus GN=Rab3a PE=1 SV=1	GLLP	GLLP	GLLP
Q63941	2	Ras-related protein Rab-3B OS=Rattus norvegicus GN=Rab3b PE=1 SV=2	GLLP	GLLP	GLLP
P62824	2	Ras-related protein Rab-3C OS=Rattus norvegicus GN=Rab3c PE=1 SV=1	GLLP	GLLP	GLLP
Q53B90	2	Ras-related protein Rab-43 OS=Rattus norvegicus GN=Rab43 PE=2 SV=1	GLLP	GLLP	GLLP
P05714	2	Ras-related protein Rab-4A OS=Rattus norvegicus GN=Rab4a PE=1 SV=3	GLLP	GLLP	GLLP
P51146	2	Ras-related protein Rab-4B OS=Rattus norvegicus GN=Rab4b PE=2 SV=1	GLLP	GLLP	GLLP
Q9WVB1	2	Ras-related protein Rab-6A OS=Rattus norvegicus GN=Rab6a PE=1 SV=2	GLLP	GLLP	GLLP
P35280	2	Ras-related protein Rab-8A OS=Rattus norvegicus GN=Rab8a PE=1 SV=2	GLLP	GLLP	GLLP
P70550	2	Ras-related protein Rab-8B OS=Rattus norvegicus GN=Rab8b PE=1 SV=1	GLLP	GLLP	GLLP
A0A0H2UHP9	2	RCG39700_ isoform CRA_d OS=Rattus norvegicus GN=Rab6a PE=1 SV=1	GLLP	GLLP	GLLP
Q80VT8	2	S100 calcium-binding protein OS=Rattus norvegicus GN=S100vp PE=2 SV=1	GLLP	GLLP	GLLP
A0A0G2K9M5	1	TBC1 domain family member 8B OS=Rattus norvegicus GN=Tbc1d8b PE=1 SV=1	GLLP	GLLP	GLLP
G3V8C3	1	Vimentin OS=Rattus norvegicus GN=Vim PE=1 SV=1	GLLP	GLLP	GLLP
P31000	1	Vimentin OS=Rattus norvegicus GN=Vim PE=1 SV=2	GLLP	GLLP	GLLP
P00489	2	Glycogen phosphorylase_ muscle form OS=Oryctolagus cuniculus GN=PYGM PE=1 SV=3

## Sheet: DPN 540 down regulated proteins
Accession	OK	Description	Unique	GLLP:CTR_Ratio	GLLP:CTR__P
A0A0G2K3K2	2	Actin_ cytoplasmic 1 OS=Rattus norvegicus GN=Actb PE=1 SV=1		0.951229	0
P14046	2	Alpha-1-inhibitor 3 OS=Rattus norvegicus GN=A1i3 PE=1 SV=1		0.427415	0
A0A0G2K926	2	Alpha-1-inhibitor III OS=Rattus norvegicus GN=LOC297568 PE=1 SV=1		0.40657	0
G3V9J1	2	Alpha-1-inhibitor III OS=Rattus norvegicus GN=LOC297568 PE=1 SV=3		0.516851	0
A0A0G2JUW7	2	Alpha-1-inhibitor III OS=Rattus norvegicus GN=Mug1 PE=1 SV=1		0.472367	0
A0A0G2JUP5	2	Alpha-1-inhibitor III OS=Rattus norvegicus GN=Mug1 PE=1 SV=1		0.496585	0
D4A6E3	2	Alpha-1-inhibitor III OS=Rattus norvegicus GN=Mug1 PE=1 SV=2		0.472367	0
D4AA52	2	Alpha-1-inhibitor III OS=Rattus norvegicus GN=Mug1 PE=1 SV=3		0.410656	0
Q63041	2	Alpha-1-macroglobulin OS=Rattus norvegicus GN=A1m PE=1 SV=1		0.612626	0
B2GV72	2	Carbonyl reductase 3 OS=Rattus norvegicus GN=Cbr3 PE=1 SV=1		0.860708	0
Z4YNX7	2	Cystatin OS=Rattus norvegicus GN=P22k15 PE=3 SV=2		0.554327	0
P22283	2	Cystatin-related protein 2 OS=Rattus norvegicus GN=Crp2 PE=2 SV=1		0.554327	0
F1M6C2	2	Elongation factor 1-alpha 1 pseudogene OS=Rattus norvegicus GN=LOC103691939 PE=1 SV=1		0.402524	0
O88752	2	Epsilon 1 globin OS=Rattus norvegicus GN=Hbe1 PE=1 SV=1		0.83527	0
A0A0G2JSW3	2	Globin a4 OS=Rattus norvegicus GN=Hbb PE=1 SV=1		0.88692	0
A0A0G2JSV6	2	Globin c2 OS=Rattus norvegicus GN=Hba-a2 PE=1 SV=1		0.794534	0
P01946	2	Hemoglobin subunit alpha-1/2 OS=Rattus norvegicus GN=Hba1 PE=1 SV=3		0.778801	0
P02091	2	Hemoglobin subunit beta-1 OS=Rattus norvegicus GN=Hbb PE=1 SV=3		0.895834	0
P11517	2	Hemoglobin subunit beta-2 OS=Rattus norvegicus PE=1 SV=2		0.826959	0
D3ZWM5	2	Histone H2B OS=Rattus norvegicus GN=Hist1h2bd PE=3 SV=2		0.726149	0
D3ZLY9	2	Histone H2B OS=Rattus norvegicus GN=Hist1h2bh PE=3 SV=2		0.71177	0
M0R4L7	2	Histone H2B OS=Rattus norvegicus GN=Hist1h2bl PE=3 SV=1		0.71177	0
A0A0G2JXI9	2	Histone H2B OS=Rattus norvegicus GN=Hist1h2bo PE=3 SV=1		0.718924	0
D3ZNH4	2	Histone H2B OS=Rattus norvegicus GN=Hist1h2bo PE=3 SV=1		0.71177	0
G3V8B3	2	Histone H2B OS=Rattus norvegicus GN=Hist1h2bq PE=3 SV=1		0.71177	0
D4A817	2	Histone H2B OS=Rattus norvegicus GN=Hist2h2be PE=3 SV=3		0.718924	0
M0RBQ5	2	Histone H2B OS=Rattus norvegicus GN=Hist3h2bb PE=3 SV=1		0.71177	0
A0A0G2JXE0	2	Histone H2B OS=Rattus norvegicus GN=LOC102549061 PE=3 SV=1		0.718924	0
P20759	2	Ig gamma-1 chain C region OS=Rattus norvegicus PE=1 SV=1		0.336216	0
P20760	2	Ig gamma-2A chain C region OS=Rattus norvegicus GN=Igg-2a PE=1 SV=1		0.600496	0
A0A0G2K9Y0	2	Immunoglobulin heavy constant mu OS=Rattus norvegicus GN=Ighm PE=4 SV=1		0.319819	0
F1LPQ6	2	Immunoglobulin heavy constant mu OS=Rattus norvegicus GN=Ighm PE=4 SV=2		0.332871	0
F1LN61	2	Immunoglobulin heavy constant mu OS=Rattus norvegicus GN=Ighm PE=4 SV=3		0.310367	0
Q5BJY9	2	Keratin_ type I cytoskeletal 18 OS=Rattus norvegicus GN=Krt18 PE=1 SV=3		0.718924	0
Q10758	2	Keratin_ type II cytoskeletal 8 OS=Rattus norvegicus GN=Krt8 PE=1 SV=3		0.802519	0
Q03626	2	Murinoglobulin-1 OS=Rattus norvegicus GN=Mug1 PE=2 SV=1		0.477114	0
Q6IE52	2	Murinoglobulin-2 OS=Rattus norvegicus GN=Mug2 PE=1 SV=1		0.486752	0
M0R5V7	2	Murinoglobulin-2 OS=Rattus norvegicus GN=Mug2 PE=1 SV=2		0.472367	0
P10111	2	Peptidyl-prolyl cis-trans isomerase A OS=Rattus norvegicus GN=Ppia PE=1 SV=2		0.559898	0
A0A0G2K2E4	2	Peptidyl-prolyl cis-trans isomerase OS=Rattus norvegicus GN=LOC100911252 PE=3 SV=1		0.559898	0
A0A0G2K1P0	2	Peptidyl-prolyl cis-trans isomerase OS=Rattus norvegicus GN=Ppia PE=1 SV=1		0.554327	0
P02782	2	Prostatic steroid-binding protein C1 OS=Rattus norvegicus GN=Psbpc1 PE=1 SV=1		0.496585	0
P11598	2	Protein disulfide-isomerase A3 OS=Rattus norvegicus GN=Pdia3 PE=1 SV=2		0.88692	0
A0A0H2UHM5	2	Protein disulfide-isomerase OS=Rattus norvegicus GN=Pdia3 PE=1 SV=1		0.895834	0
P05964	2	Protein S100-A6 OS=Rattus norvegicus GN=S100a6 PE=1 SV=3		0.740818	0
P02769	2	Serum albumin OS=Bos taurus GN=ALB PE=1 SV=4		0.398519	0
A0A0G2JSH5	2	Serum albumin OS=Rattus norvegicus GN=Alb PE=1 SV=1		0.733447	0
P02770	2	Serum albumin OS=Rattus norvegicus GN=Alb PE=1 SV=2		0.71177	0
R4GNK3	2	Thioredoxin OS=Rattus norvegicus GN=Txn1 PE=1 SV=1		0.625002	0
A0A0G2JWK7	2	Transgelin OS=Rattus norvegicus GN=Tagln PE=1 SV=1		0.718924	0
P31232	2	Transgelin OS=Rattus norvegicus GN=Tagln PE=1 SV=2		0.71177	0
A0A0G2JVI3	2	Uncharacterized protein OS=Rattus norvegicus PE=3 SV=1		0.755784	0
D3ZRN3	2	Actin_ beta-like 2 OS=Rattus norvegicus GN=Actbl2 PE=1 SV=1		0.913931	0.01
P63259	2	Actin_ cytoplasmic 2 OS=Rattus norvegicus GN=Actg1 PE=1 SV=1		0.951229	0.01
P01026	2	Complement C3 OS=Rattus norvegicus GN=C3 PE=1 SV=3		0.582748	0.01
D3ZNZ9	2	Histone H2B OS=Rattus norvegicus GN=Hist3h2ba PE=3 SV=1		0.718924	0.01
P60711	2	Actin_ cytoplasmic 1 OS=Rattus norvegicus GN=Actb PE=1 SV=1		0.951229	0.02
A0A0G2QC50	2	CD55 molecule_ decay accelerating factor for complement OS=Rattus norvegicus GN=Cd55 PE=1 SV=1		0.802519	0.02
M0RCB1	2	Uncharacterized protein OS=Rattus norvegicus PE=3 SV=1		0.869358	0.02
A0A0G2QC06	2	Serotransferrin OS=Rattus norvegicus GN=Tf PE=1 SV=1		0.895834	0.03
P12346	2	Serotransferrin OS=Rattus norvegicus GN=Tf PE=1 SV=3		0.895834	0.03
D4A4S3	2	Heat shock cognate 71 kDa protein OS=Rattus norvegicus GN=Hspa8 PE=3 SV=3		0.895834	0.04
Q00715	2	Histone H2B type 1 OS=Rattus norvegicus PE=1 SV=2		0.726149	0.04
Q562C9	1	1_2-dihydroxy-3-keto-5-methylthiopentene dioxygenase OS=Rattus norvegicus GN=Adi1 PE=2 SV=1	CTR	CTR	CTR
Q9WVC7	1	A-kinase anchor protein 6 OS=Rattus norvegicus GN=Akap6 PE=1 SV=1	CTR	CTR	CTR
P00330	1	Alcohol dehydrogenase 1 OS=Saccharomyces cerevisiae (strain ATCC 204508 / S288c) GN=ADH1 PE=1 SV=5	CTR	CTR	CTR
P11884	1	Aldehyde dehydrogenase_ mitochondrial OS=Rattus norvegicus GN=Aldh2 PE=1 SV=1	CTR	CTR	CTR
F1LN88	1	Aldehyde dehydrogenase_ mitochondrial OS=Rattus norvegicus GN=Aldh2 PE=1 SV=2	CTR	CTR	CTR
A0A0G2JZ73	1	Alpha-1-antiproteinase OS=Rattus norvegicus GN=Serpina1 PE=1 SV=1	CTR	CTR	CTR
A0A0G2JY31	1	Alpha-1-antiproteinase OS=Rattus norvegicus GN=Serpina1 PE=1 SV=1	CTR	CTR	CTR
P17475	1	Alpha-1-antiproteinase OS=Rattus norvegicus GN=Serpina1 PE=1 SV=2	CTR	CTR	CTR
F1MAK0	1	Angiogenic factor with G patch and FHA domains 1 OS=Rattus norvegicus GN=Aggf1 PE=4 SV=3	CTR	CTR	CTR
P00762	2	Anionic trypsin-1 OS=Rattus norvegicus GN=Prss1 PE=1 SV=1	CTR	CTR	CTR
P07150	2	Annexin A1 OS=Rattus norvegicus GN=Anxa1 PE=1 SV=2	CTR	CTR	CTR
Q6P691	1	C2 calcium-dependent domain-containing 2 OS=Rattus norvegicus GN=C2cd2 PE=1 SV=1	CTR	CTR	CTR
A0A0G2JU40	1	C2 calcium-dependent domain-containing 2 OS=Rattus norvegicus GN=C2cd2 PE=1 SV=1	CTR	CTR	CTR
M0RBJ7	2	Complement C3 OS=Rattus norvegicus GN=C3 PE=1 SV=1	CTR	CTR	CTR
M0RBF1	2	Complement C3 OS=Rattus norvegicus GN=C3 PE=1 SV=1	CTR	CTR	CTR
P47875	2	Cysteine and glycine-rich protein 1 OS=Rattus norvegicus GN=Csrp1 PE=1 SV=2	CTR	CTR	CTR
D4A1R0	1	DEAH-box helicase 37 OS=Rattus norvegicus GN=Dhx37 PE=1 SV=1	CTR	CTR	CTR
Q5XFV4	1	Fabp4 protein OS=Rattus norvegicus GN=Fabp4 PE=1 SV=1	CTR	CTR	CTR
A0A0G2K586	1	Fatty acid-binding protein_ adipocyte OS=Rattus norvegicus GN=Fabp4 PE=1 SV=1	CTR	CTR	CTR
P70623	1	Fatty acid-binding protein_ adipocyte OS=Rattus norvegicus GN=Fabp4 PE=1 SV=3	CTR	CTR	CTR
P02680	2	Fibrinogen gamma chain OS=Rattus norvegicus GN=Fgg PE=1 SV=3	CTR	CTR	CTR
P09117	2	Fructose-bisphosphate aldolase C OS=Rattus norvegicus GN=Aldoc PE=1 SV=3	CTR	CTR	CTR
Q6AY07	2	Fructose-bisphosphate aldolase OS=Rattus norvegicus GN=Aldoart2 PE=2 SV=1	CTR	CTR	CTR
A0A0G2K3Q6	2	Fructose-bisphosphate aldolase OS=Rattus norvegicus GN=Aldoc PE=1 SV=1	CTR	CTR	CTR
D3ZHY4	1	Glycine-N-acyltransferase-like 3 OS=Rattus norvegicus GN=Glyatl3 PE=4 SV=1	CTR	CTR	CTR
Q53E76	1	Glycosyltransferase-like domain-containing protein 1 OS=Rattus norvegicus GN=Gtdc1 PE=2 SV=1	CTR	CTR	CTR
A0A096MJI4	1	GRB10-interacting GYF protein 2 (Fragment) OS=Rattus norvegicus GN=Gigyf2 PE=1 SV=1	CTR	CTR	CTR
A0A0G2K477	2	Immunoglobulin heavy constant mu OS=Rattus norvegicus GN=Ighm PE=4 SV=1	CTR	CTR	CTR
Q6P6T9	1	Importin subunit alpha OS=Rattus norvegicus GN=Kpna2 PE=2 SV=1	CTR	CTR	CTR
M0R7I0	1	Importin subunit alpha OS=Rattus norvegicus GN=LOC100359600 PE=3 SV=1	CTR	CTR	CTR
F1M5A4	2	Katanin p60 ATPase-containing subunit A-like 2 OS=Rattus norvegicus GN=Katnal2 PE=3 SV=3	CTR	CTR	CTR
G3V8L3	1	Lamin A_ isoform CRA_b OS=Rattus norvegicus GN=Lmna PE=1 SV=1	CTR	CTR	CTR
Q6P6U3	1	Lmna protein OS=Rattus norvegicus GN=Lmna PE=1 SV=1	CTR	CTR	CTR
D4A5D4	1	Microtubule crosslinking factor 1 OS=Rattus norvegicus GN=Mtcl1 PE=1 SV=3	CTR	CTR	CTR
A0A1W2Q6E9	1	Moesin OS=Rattus norvegicus GN=Msn PE=1 SV=1	CTR	CTR	CTR
A0A096MK30	1	Moesin OS=Rattus norvegicus GN=Msn PE=1 SV=1	CTR	CTR	CTR
O35763	1	Moesin OS=Rattus norvegicus GN=Msn PE=1 SV=3	CTR	CTR	CTR
A0A0G2K0Q7	1	Myosin light chain kinase OS=Rattus norvegicus GN=Mylk PE=1 SV=1	CTR	CTR	CTR
D3ZFU9	1	Myosin light chain kinase OS=Rattus norvegicus GN=Mylk PE=1 SV=2	CTR	CTR	CTR
G3V9Y1	1	Myosin_ heavy polypeptide 10_ non-muscle_ isoform CRA_b OS=Rattus norvegicus GN=Myh10 PE=1 SV=1	CTR	CTR	CTR
Q9JLT0	1	Myosin-10 OS=Rattus norvegicus GN=Myh10 PE=1 SV=1	CTR	CTR	CTR
G3V8R1	1	Nucleobindin 2_ isoform CRA_b OS=Rattus norvegicus GN=Nucb2 PE=1 SV=1	CTR	CTR	CTR
Q9JI85	1	Nucleobindin-2 OS=Rattus norvegicus GN=Nucb2 PE=1 SV=1	CTR	CTR	CTR
M0RCZ9	2	Peptidyl-prolyl cis-trans isomerase OS=Rattus norvegicus GN=Ppial4g PE=1 SV=2	CTR	CTR	CTR
D3ZQ57	1	Plexin B2 OS=Rattus norvegicus GN=Plxnb2 PE=1 SV=1	CTR	CTR	CTR
P48679	1	Prelamin-A/C OS=Rattus norvegicus GN=Lmna PE=1 SV=1	CTR	CTR	CTR
A0A0G2K3R2	1	Prelamin-A/C OS=Rattus norvegicus GN=Lmna PE=1 SV=1	CTR	CTR	CTR
A0A0G2JTC5	1	Prelamin-A/C OS=Rattus norvegicus GN=Lmna PE=1 SV=1	CTR	CTR	CTR
A0A1B0GWU9	1	Prelamin-A/C OS=Rattus norvegicus GN=Lmna PE=1 SV=1	CTR	CTR	CTR
G3V9W4	1	Probable Xaa-Pro aminopeptidase 3 OS=Rattus norvegicus GN=Xpnpep3 PE=1 SV=1	CTR	CTR	CTR
B5DEQ3	1	Probable Xaa-Pro aminopeptidase 3 OS=Rattus norvegicus GN=Xpnpep3 PE=1 SV=1	CTR	CTR	CTR
A0A0G2JVG3	1	Pyruvate kinase OS=Rattus norvegicus GN=Pkm PE=1 SV=1	CTR	CTR	CTR
M0RD14	1	Pyruvate kinase OS=Rattus norvegicus GN=Pkm PE=3 SV=2	CTR	CTR	CTR
P11980	1	Pyruvate kinase PKM OS=Rattus norvegicus GN=Pkm PE=1 SV=3	CTR	CTR	CTR
G3V8H6	2	RCG27439 OS=Rattus norvegicus GN=Zfp606 PE=4 SV=1	CTR	CTR	CTR
Q498M9	1	Similar to glyceraldehyde-3-phosphate dehydrogenase OS=Rattus norvegicus GN=LOC303448 PE=1 SV=1	CTR	CTR	CTR
A0A0G2K896	2	Similar to RIKEN cDNA 1300017J02 OS=Rattus norvegicus GN=RGD1310507 PE=1 SV=1	CTR	CTR	CTR
E9PST1	2	Similar to RIKEN cDNA 1300017J02 OS=Rattus norvegicus GN=RGD1310507 PE=1 SV=3	CTR	CTR	CTR
D3ZBV9	1	Similar to YEATS domain containing 2 (Predicted) OS=Rattus norvegicus GN=Yeats2 PE=1 SV=1	CTR	CTR	CTR
D4A6T1	2	Spermatogenesis associated 5 (Predicted)_ isoform CRA_a OS=Rattus norvegicus GN=Spata5 PE=1 SV=1	CTR	CTR	CTR
A0A0G2K0I1	2	Spermatogenesis-associated 5 OS=Rattus norvegicus GN=Spata5 PE=1 SV=1	CTR	CTR	CTR
P07632	2	Superoxide dismutase [Cu-Zn] OS=Rattus norvegicus GN=Sod1 PE=1 SV=2	CTR	CTR	CTR
B4F7C2	2	Tubulin beta chain OS=Rattus norvegicus GN=Tubb4a PE=1 SV=1	CTR	CTR	CTR
G3V7C6	2	Tubulin beta chain OS=Rattus norvegicus GN=Tubb4b PE=1 SV=2	CTR	CTR	CTR
Q4QQV0	2	Tubulin beta chain OS=Rattus norvegicus GN=Tubb6 PE=1 SV=1	CTR	CTR	CTR
P85108	2	Tubulin beta-2A chain OS=Rattus norvegicus GN=Tubb2a PE=1 SV=1	CTR	CTR	CTR
Q3KRE8	2	Tubulin beta-2B chain OS=Rattus norvegicus GN=Tubb2b PE=1 SV=1	CTR	CTR	CTR
Q4QRB4	2	Tubulin beta-3 chain OS=Rattus norvegicus GN=Tubb3 PE=1 SV=1	CTR	CTR	CTR
Q6P9T8	2	Tubulin beta-4B chain OS=Rattus norvegicus GN=Tubb4b PE=1 SV=1	CTR	CTR	CTR
P69897	2	Tubulin beta-5 chain OS=Rattus norvegicus GN=Tubb5 PE=1 SV=1	CTR	CTR	CTR
M0R8V0	1	UHRF1-binding protein 1-like OS=Rattus norvegicus GN=LOC100910056 PE=1 SV=2	CTR	CTR	CTR
F1M2N4	1	Uncharacterized protein OS=Rattus norvegicus PE=1 SV=2	CTR	CTR	CTR
A0A0G2K7R1	2	Uncharacterized protein OS=Rattus norvegicus PE=3 SV=1	CTR	CTR	CTR
F1M4G6	1	Uncharacterized protein OS=Rattus norvegicus PE=3 SV=1	CTR	CTR	CTR
D3ZEN2	1	Uncharacterized protein OS=Rattus norvegicus PE=4 SV=2	CTR	CTR	CTR
Q5FVN8	1	WD repeat_ SAM and U-box domain-containing protein 1 OS=Rattus norvegicus GN=Wdsub1 PE=2 SV=1	CTR	CTR	CTR
A0A0H2UHE3	1	WD repeat_ SAM and U-box domain-containing protein 1 OS=Rattus norvegicus GN=Wdsub1 PE=4 SV=1	CTR	CTR	CTR
A0A0G2K765	2	Zinc finger protein 606 OS=Rattus norvegicus GN=Zfp606 PE=4 SV=1	CTR	CTR	CTR

## Sheet: DPN 540 up regulated proteins
Accession	OK	Description	Unique	GLLP:CTR_Ratio	GLLP:CTR__P
D3ZVQ8	2	Glutathione S-transferase_ mu 6-like OS=Rattus norvegicus GN=Gstm6 PE=4 SV=3		1.2586	0.95
Q08290	1	Calponin-1 OS=Rattus norvegicus GN=Cnn1 PE=1 SV=1		2.01375	0.96
P04636	2	Malate dehydrogenase_ mitochondrial OS=Rattus norvegicus GN=Mdh2 PE=1 SV=2		1.37713	0.96
P04785	2	Protein disulfide-isomerase OS=Rattus norvegicus GN=P4hb PE=1 SV=2		1.1853	0.96
A0A0G2K6L4	2	Glutathione S-transferase_ mu 6 (Predicted)_ isoform CRA_a OS=Rattus norvegicus GN=Gstm6l PE=1 SV=1		1.29693	0.97
A0A0G2JZ09	2	Glutathione S-transferase_ mu 6-like OS=Rattus norvegicus GN=Gstm6l PE=1 SV=1		1.28403	0.98
E9PTV9	2	Glyceraldehyde-3-phosphate dehydrogenase OS=Rattus norvegicus GN=RGD1562758 PE=1 SV=2		1.69893	0.98
Q63081	2	Protein disulfide-isomerase A6 OS=Rattus norvegicus GN=Pdia6 PE=1 SV=2		1.13883	0.98
F1LUV3	2	Similar to glyceraldehyde-3-phosphate dehydrogenase OS=Rattus norvegicus GN=LOC291543 PE=1 SV=3		1.50682	0.98
P58775	2	Tropomyosin beta chain OS=Rattus norvegicus GN=Tpm2 PE=1 SV=1		1.47698	0.98
P18418	2	Calreticulin OS=Rattus norvegicus GN=Calr PE=1 SV=1		1.23368	0.99
A0A0G2JSZ5	2	Protein disulfide-isomerase A6 OS=Rattus norvegicus GN=Pdia6 PE=1 SV=1		1.16183	0.99
Q91XN6	2	Tropomyosin 1_ alpha_ isoform CRA_h OS=Rattus norvegicus GN=Tpm1 PE=1 SV=1		1.53726	0.99
A0A0G2JX64	2	Tropomyosin 1_ alpha_ isoform CRA_i OS=Rattus norvegicus GN=Tpm1 PE=1 SV=1		1.49182	0.99
A0A0G2JSQ4	2	Tropomyosin 1_ alpha_ isoform CRA_p OS=Rattus norvegicus GN=Tpm1 PE=1 SV=1		1.47698	0.99
A0A0G2K7F7	2	Tropomyosin alpha-1 chain OS=Rattus norvegicus GN=Tpm1 PE=1 SV=1		1.47698	0.99
Q63610	2	Tropomyosin alpha-3 chain OS=Rattus norvegicus GN=Tpm3 PE=1 SV=2		1.46228	0.99
A0A0G2K2G8	2	Tropomyosin alpha-4 chain OS=Rattus norvegicus GN=Tpm4 PE=1 SV=1		1.49182	0.99
P06761	2	78 kDa glucose-regulated protein OS=Rattus norvegicus GN=Hspa5 PE=1 SV=1		1.2586	1
Q63607	2	Alpha-tropomyosin 3 OS=Rattus norvegicus GN=Tpm1 PE=1 SV=1		1.50682	1
A0A0G2JSU6	2	Cystatin OS=Rattus norvegicus GN=Andpro PE=3 SV=1		4.57223	1
P22282	2	Cystatin-related protein 1 OS=Rattus norvegicus GN=Andpro PE=1 SV=1		2.01375	1
P36375	2	Glandular kallikrein-10 OS=Rattus norvegicus GN=Klk10 PE=1 SV=2		1.58407	1
P36376	2	Glandular kallikrein-12_ submandibular/renal OS=Rattus norvegicus GN=Klk12 PE=2 SV=1		1.59999	1
P36373	2	Glandular kallikrein-7_ submandibular/renal OS=Rattus norvegicus GN=Klk7 PE=1 SV=1		1.46228	1
Q62669	2	Globin a1 OS=Rattus norvegicus GN=LOC103694855 PE=1 SV=1		6.75309	1
P08010	2	Glutathione S-transferase Mu 2 OS=Rattus norvegicus GN=Gstm2 PE=1 SV=2		1.93479	1
A0A0G2K4U2	2	Glutathione S-transferase Mu 2 OS=Rattus norvegicus GN=Gstm7 PE=1 SV=1		1.99372	1
Q5BK56	2	Glutathione S-transferase OS=Rattus norvegicus GN=Gstm4 PE=1 SV=1		1.82212	1
P08009	2	Glutathione S-transferase Yb-3 OS=Rattus norvegicus GN=Gstm3 PE=1 SV=2		1.82212	1
A0A0G2JTW9	2	Hemoglobin_ beta adult major chain OS=Rattus norvegicus GN=Hbb-b1 PE=1 SV=1		6.5535	1
G3V9C0	2	Histone H2A OS=Rattus norvegicus GN=Hist1h2ac PE=3 SV=1		1.1853	1
Q6I8Q6	2	Histone H2A OS=Rattus norvegicus GN=Hist1h2af PE=3 SV=1		1.19722	1
D3ZVK7	2	Histone H2A OS=Rattus norvegicus GN=Hist1h2ak PE=3 SV=1		1.20925	1
D4ACV3	2	Histone H2A OS=Rattus norvegicus GN=Hist2h2ac PE=3 SV=2		1.19722	1
M0RCL5	2	Histone H2A OS=Rattus norvegicus GN=LOC100910554 PE=1 SV=1		1.19722	1
M0RDM4	2	Histone H2A OS=Rattus norvegicus GN=LOC680322 PE=3 SV=1		1.19722	1
P02262	2	Histone H2A type 1 OS=Rattus norvegicus PE=1 SV=2		1.1853	1
P0C169	2	Histone H2A type 1-C OS=Rattus norvegicus PE=1 SV=2		1.20925	1
P0C170	2	Histone H2A type 1-E OS=Rattus norvegicus PE=1 SV=2		1.20925	1
Q64598	2	Histone H2A type 1-F OS=Rattus norvegicus PE=3 SV=3		1.20925	1
P0CC09	2	Histone H2A type 2-A OS=Rattus norvegicus GN=Hist2h2aa3 PE=1 SV=1		1.19722	1
Q4FZT6	2	Histone H2A type 3 OS=Rattus norvegicus PE=2 SV=3		1.19722	1
Q00728	2	Histone H2A type 4 OS=Rattus norvegicus PE=2 SV=2		1.20925	1
A9UMV8	2	Histone H2A.J OS=Rattus norvegicus GN=H2afj PE=2 SV=1		1.20925	1
Q63617	2	Hypoxia up-regulated protein 1 OS=Rattus norvegicus GN=Hyou1 PE=1 SV=1		15.7998	1
G3V8H1	2	Kallikrein 1 OS=Rattus norvegicus GN=Klk1 PE=3 SV=1		1.33643	1
A0A0G2JX00	2	Kallikrein 1 OS=Rattus norvegicus GN=Klk1c9 PE=3 SV=1		1.53726	1
A0A0G2K6G1	2	Kallikrein 1 OS=Rattus norvegicus GN=Klk1c9 PE=3 SV=1		1.47698	1
F1LNH4	2	Kallikrein 1-related peptidase C12 OS=Rattus norvegicus GN=Klk1c12 PE=3 SV=1		1.58407	1
A0A0G2K797	2	Kallikrein 1-related peptidase C6 OS=Rattus norvegicus GN=Klk1c6 PE=3 SV=1		1.58407	1
W4VSR8	2	Kallikrein 1-related peptidase C6 OS=Rattus norvegicus GN=Klk1c6 PE=3 SV=2		1.58407	1
G3V8G8	2	Kallikrein 1-related peptidase C8 OS=Rattus norvegicus GN=Klk1c8 PE=3 SV=1		1.37713	1
A0A0G2JSS8	2	Peroxiredoxin 5_ isoform CRA_c OS=Rattus norvegicus GN=Prdx5 PE=1 SV=1		1.29693	1
Q9R063	2	Peroxiredoxin-5_ mitochondrial OS=Rattus norvegicus GN=Prdx5 PE=1 SV=1		1.30996	1
P15399	2	Probasin OS=Rattus norvegicus GN=Pbsn PE=1 SV=1		4.85496	1
P36374	2	Prostatic glandular kallikrein-6 OS=Rattus norvegicus GN=Klk6 PE=3 SV=1		1.39097	1
M0RDZ8	2	Prostatic glandular kallikrein-6-like OS=Rattus norvegicus GN=LOC103690048 PE=3 SV=1		1.33643	1
P08723	2	Prostatic spermine-binding protein OS=Rattus norvegicus GN=Sbp PE=1 SV=1		2.88637	1
A0A0G2K4C9	2	Prostatic spermine-binding protein OS=Rattus norvegicus GN=Sbp PE=4 SV=1		2.88637	1
A0A0G2JTU6	2	Prostatic spermine-binding protein OS=Rattus norvegicus GN=Sbp PE=4 SV=1		2.91538	1
A0A0G2K176	2	Prostatic spermine-binding protein OS=Rattus norvegicus GN=Sbp PE=4 SV=1		2.88637	1
P02781	2	Prostatic steroid-binding protein C2 OS=Rattus norvegicus GN=Psbpc2 PE=1 SV=1		1.16183	1
P02780	2	Secretoglobin family 2A member 2 OS=Rattus norvegicus GN=Scgb2a2 PE=1 SV=1		1.33643	1
D3Z9U8	2	Similar to S100 calcium-binding protein_ ventral prostate OS=Rattus norvegicus GN=RGD1562234 PE=4 SV=1		1.28403	1
A0A0G2K7Y9	2	Spermine-binding protein-like OS=Rattus norvegicus GN=Sbpl PE=4 SV=1		2.97427	1
A0A0G2JZ90	2	Spermine-binding protein-like OS=Rattus norvegicus GN=Sbpl PE=4 SV=1		2.94468	1
P07647	2	Submandibular glandular kallikrein-9 OS=Rattus norvegicus GN=Klk9 PE=1 SV=1		1.56831	1
P11232	2	Thioredoxin OS=Rattus norvegicus GN=Txn PE=1 SV=2		1.87761	1
Q923Z2	2	Tropomyosin 1_ alpha_ isoform CRA_a OS=Rattus norvegicus GN=Tpm1 PE=1 SV=1		1.46228	1
P04692	2	Tropomyosin alpha-1 chain OS=Rattus norvegicus GN=Tpm1 PE=1 SV=3		1.47698	1
P09495	2	Tropomyosin alpha-4 chain OS=Rattus norvegicus GN=Tpm4 PE=1 SV=3		1.49182	1
F1MAE5	1	Uncharacterized protein OS=Rattus norvegicus PE=1 SV=3		10.1757	1
A0A0G2JX19	2	Uncharacterized protein OS=Rattus norvegicus PE=3 SV=1		1.58407	1
D4A5P8	1	WAP four-disulfide core domain 3 OS=Rattus norvegicus GN=Wfdc3 PE=4 SV=1		1.64872	1
P62260	2	14-3-3 protein epsilon OS=Rattus norvegicus GN=Ywhae PE=1 SV=1	GLLP	GLLP	GLLP
A0A0G2JV65	1	14-3-3 protein zeta/delta OS=Rattus norvegicus GN=Ywhaz PE=1 SV=1	GLLP	GLLP	GLLP
P63102	1	14-3-3 protein zeta/delta OS=Rattus norvegicus GN=Ywhaz PE=1 SV=1	GLLP	GLLP	GLLP
D3ZJT4	2	60S acidic ribosomal protein P0 OS=Rattus norvegicus GN=RGD1564469 PE=3 SV=3	GLLP	GLLP	GLLP
P19945	2	60S acidic ribosomal protein P0 OS=Rattus norvegicus GN=Rplp0 PE=1 SV=2	GLLP	GLLP	GLLP
Q6IMA9	1	ADP-ribosylation factor-like 9 OS=Rattus norvegicus GN=Arl9 PE=2 SV=1	GLLP	GLLP	GLLP
F1LP05	2	ATP synthase subunit alpha OS=Rattus norvegicus GN=Atp5a1 PE=1 SV=1	GLLP	GLLP	GLLP
P15999	2	ATP synthase subunit alpha_ mitochondrial OS=Rattus norvegicus GN=Atp5a1 PE=1 SV=2	GLLP	GLLP	GLLP
P27139	2	Carbonic anhydrase 2 OS=Rattus norvegicus GN=Ca2 PE=1 SV=2	GLLP	GLLP	GLLP
M0R3X6	2	Carbonyl reductase [NADPH] 1 OS=Rattus norvegicus GN=Cbr1 PE=1 SV=1	GLLP	GLLP	GLLP
A0A096MJ24	2	Carbonyl reductase [NADPH] 1 OS=Rattus norvegicus GN=Cbr1 PE=1 SV=1	GLLP	GLLP	GLLP
A0A0G2JSV2	2	Carbonyl reductase [NADPH] 1 OS=Rattus norvegicus GN=Cbr1 PE=1 SV=1	GLLP	GLLP	GLLP
P47727	2	Carbonyl reductase [NADPH] 1 OS=Rattus norvegicus GN=Cbr1 PE=1 SV=2	GLLP	GLLP	GLLP
A0A0G2K658	2	Carbonyl reductase [NADPH] 1 OS=Rattus norvegicus GN=LOC102556347 PE=1 SV=1	GLLP	GLLP	GLLP
Q6P725	1	Desmin OS=Rattus norvegicus GN=Des PE=1 SV=1	GLLP	GLLP	GLLP
P48675	1	Desmin OS=Rattus norvegicus GN=Des PE=1 SV=2	GLLP	GLLP	GLLP
B0BN47	2	Glutathione S-transferase OS=Rattus norvegicus GN=Gstm6 PE=1 SV=1	GLLP	GLLP	GLLP
P04906	1	Glutathione S-transferase P OS=Rattus norvegicus GN=Gstp1 PE=1 SV=2	GLLP	GLLP	GLLP
Q63942	2	GTP-binding protein Rab-3D OS=Rattus norvegicus GN=Rab3d PE=1 SV=2	GLLP	GLLP	GLLP
Q66H30	1	Gypsy retrotransposon integrase-like protein 1 OS=Rattus norvegicus GN=GIN1 PE=2 SV=1	GLLP	GLLP	GLLP
M0R6X5	2	Histone H2A OS=Rattus norvegicus PE=3 SV=2	GLLP	GLLP	GLLP
F1LWJ6	2	Myosin IIIB OS=Rattus norvegicus GN=Myo3b PE=4 SV=3	GLLP	GLLP	GLLP
Q6MG75	1	Negative elongation factor complex member E OS=Rattus norvegicus GN=Nelfe PE=1 SV=1	GLLP	GLLP	GLLP
P19527	2	Neurofilament light polypeptide OS=Rattus norvegicus GN=Nefl PE=1 SV=3	GLLP	GLLP	GLLP
Q5RKJ9	2	RAB10_ member RAS oncogene family OS=Rattus norvegicus GN=Rab10 PE=1 SV=1	GLLP	GLLP	GLLP
B0BMW0	2	RAB14_ member RAS oncogene family OS=Rattus norvegicus GN=Rab14 PE=1 SV=1	GLLP	GLLP	GLLP
A0A0G2K235	2	RAB1A_ member RAS oncogene family OS=Rattus norvegicus GN=Rab1a PE=1 SV=1	GLLP	GLLP	GLLP
E9PU16	2	RAB1A_ member RAS oncogene family OS=Rattus norvegicus GN=Rab1a PE=1 SV=2	GLLP	GLLP	GLLP
G3V6H0	2	RAB1B_ member RAS oncogene family-like OS=Rattus norvegicus GN=LOC100363782 PE=4 SV=1	GLLP	GLLP	GLLP
A0A0G2JTT4	2	RAB30_ member RAS oncogene family OS=Rattus norvegicus GN=Rab30 PE=1 SV=1	GLLP	GLLP	GLLP
F1LW77	2	RAB33B_ member RAS oncogene family OS=Rattus norvegicus GN=Rab33b PE=1 SV=2	GLLP	GLLP	GLLP
D4A0G7	2	RAB37_ member RAS oncogene family OS=Rattus norvegicus GN=Rab37 PE=4 SV=1	GLLP	GLLP	GLLP
D3ZZP2	2	RAB39_ member RAS oncogene family (Predicted) OS=Rattus norvegicus GN=Rab39a PE=4 SV=1	GLLP	GLLP	GLLP
A0A0G2K201	2	RAB42_ member RAS oncogene family OS=Rattus norvegicus GN=Rab42 PE=4 SV=1	GLLP	GLLP	GLLP
A0A0G2JT78	2	RAB6B_ member RAS oncogene family OS=Rattus norvegicus GN=Rab6b PE=4 SV=1	GLLP	GLLP	GLLP
F1LVC3	2	RAB6B_ member RAS oncogene family OS=Rattus norvegicus GN=Rab6b PE=4 SV=2	GLLP	GLLP	GLLP
P35281	2	Ras-related protein Rab-10 OS=Rattus norvegicus GN=Rab10 PE=1 SV=1	GLLP	GLLP	GLLP
P35284	2	Ras-related protein Rab-12 OS=Rattus norvegicus GN=Rab12 PE=1 SV=2	GLLP	GLLP	GLLP
D4A376	2	Ras-related protein Rab-12 OS=Rattus norvegicus GN=Rab12 PE=1 SV=3	GLLP	GLLP	GLLP
P35286	2	Ras-related protein Rab-13 OS=Rattus norvegicus GN=Rab13 PE=1 SV=2	GLLP	GLLP	GLLP
A0A1B0GWR3	2	Ras-related protein Rab-14 (Fragment) OS=Rattus norvegicus GN=Rab14 PE=1 SV=1	GLLP	GLLP	GLLP
P61107	2	Ras-related protein Rab-14 OS=Rattus norvegicus GN=Rab14 PE=1 SV=3	GLLP	GLLP	GLLP
P35289	2	Ras-related protein Rab-15 OS=Rattus norvegicus GN=Rab15 PE=2 SV=1	GLLP	GLLP	GLLP
Q6NYB7	2	Ras-related protein Rab-1A OS=Rattus norvegicus GN=Rab1A PE=1 SV=3	GLLP	GLLP	GLLP
P10536	2	Ras-related protein Rab-1B OS=Rattus norvegicus GN=Rab1b PE=1 SV=1	GLLP	GLLP	GLLP
P51156	2	Ras-related protein Rab-26 OS=Rattus norvegicus GN=Rab26 PE=2 SV=2	GLLP	GLLP	GLLP
Q5U316	2	Ras-related protein Rab-35 OS=Rattus norvegicus GN=Rab35 PE=1 SV=1	GLLP	GLLP	GLLP
P63012	2	Ras-related protein Rab-3A OS=Rattus norvegicus GN=Rab3a PE=1 SV=1	GLLP	GLLP	GLLP
Q63941	2	Ras-related protein Rab-3B OS=Rattus norvegicus GN=Rab3b PE=1 SV=2	GLLP	GLLP	GLLP
P62824	2	Ras-related protein Rab-3C OS=Rattus norvegicus GN=Rab3c PE=1 SV=1	GLLP	GLLP	GLLP
Q53B90	2	Ras-related protein Rab-43 OS=Rattus norvegicus GN=Rab43 PE=2 SV=1	GLLP	GLLP	GLLP
P05714	2	Ras-related protein Rab-4A OS=Rattus norvegicus GN=Rab4a PE=1 SV=3	GLLP	GLLP	GLLP
P51146	2	Ras-related protein Rab-4B OS=Rattus norvegicus GN=Rab4b PE=2 SV=1	GLLP	GLLP	GLLP
Q9WVB1	2	Ras-related protein Rab-6A OS=Rattus norvegicus GN=Rab6a PE=1 SV=2	GLLP	GLLP	GLLP
P35280	2	Ras-related protein Rab-8A OS=Rattus norvegicus GN=Rab8a PE=1 SV=2	GLLP	GLLP	GLLP
P70550	2	Ras-related protein Rab-8B OS=Rattus norvegicus GN=Rab8b PE=1 SV=1	GLLP	GLLP	GLLP
A0A0H2UHP9	2	RCG39700_ isoform CRA_d OS=Rattus norvegicus GN=Rab6a PE=1 SV=1	GLLP	GLLP	GLLP
Q80VT8	2	S100 calcium-binding protein OS=Rattus norvegicus GN=S100vp PE=2 SV=1	GLLP	GLLP	GLLP
A0A0G2K9M5	1	TBC1 domain family member 8B OS=Rattus norvegicus GN=Tbc1d8b PE=1 SV=1	GLLP	GLLP	GLLP
G3V8C3	1	Vimentin OS=Rattus norvegicus GN=Vim PE=1 SV=1	GLLP	GLLP	GLLP
P31000	1	Vimentin OS=Rattus norvegicus GN=Vim PE=1 SV=2	GLLP	GLLP	GLLP
