# Supplementary material for: Identification of potential molecular pathways involved in prostate carcinogenesis in offspring exposed to maternal malnutrition
Source: Aging (Albany NY). 2020 Oct 13;12(20):19954–78. doi: 10.18632/aging.104093 (PMC7655221; doi:10.18632/aging.104093)
Supplement: Supplementary File 2 [file aging-12-104093-s004..xlsx]

## Sheet: 21 down p<0.05
Term	p value	Corrected P-Value	-Log10 (p-value)	proteins name
Cell cycle	9.27e-10	7.38e-08	7.13194	P68255|P63102|P68511|P61983|G3V9A3|Q5EBB0|P35213	1
Hippo signaling pathway	4.19e-09	3.12e-07	6.50585	P68255|P63102|P68511|P61983|P63259|P60711|P35213	2
FGF signaling pathway	5.52e-09	3.98e-07	6.40012	P68255|P63102|P68511|P61983|Q5EBB0|P35213	3
EGF receptor signaling pathway	5.89e-09	4.12e-07	6.3851	P68255|P63102|P68511|P61983|Q5EBB0|P35213	4
Cytoskeletal regulation by Rho GTPase	1.78e-08	1.11e-06	5.95468	P63269|P60711|P68136|P62963|P63259	5
Apoptosis	4.4e-06	0.000139103	3.85666	Q6P9V9|P63259|Q6AYZ1|P68370|P60711	6
Cadherin signaling pathway	7.06e-06	0.000220097	3.65739	P63269|P60711|P68136|P63259	7
Gap junction	1.93e-05	0.000522504	3.28191	Q6P9V9|P68370|B4F7C2|Q6AYZ1	8
PI3K-Akt signaling pathway	0.000141475	0.00271909	2.56558	P68255|P35213|P61983|P63102|P68511	9
Regulation of actin cytoskeleton	0.000431158	0.00637616	2.19544	P60711|Q64122|P62963|P63259	10
Tight junction	0.0012305	0.0133904	1.87321	P60711|Q64122|P63259	11
Focal adhesion	0.00358309	0.0314304	1.50265	P60711|Q64122|P63259	12
Rap1 signaling pathway	0.00512069	0.0396424	1.40184	P60711|P62963|P63259	13
Adherens junction	0.00520426	0.0400208	1.39771	P60711|P63259	14
p53 signaling pathway	0.006769	0.047129	1.32671	Q5EBB0|G3V9A3	15
1	Protein names	Gene names	Organism	Length
P68255	14-3-3 protein theta (14-3-3 protein tau)	Ywhaq	Rattus norvegicus (Rat)	245
P63102	14-3-3 protein zeta/delta (Mitochondrial import stimulation factor S1 subunit) (Protein kinase C inhibitor protein 1) (KCIP-1)	Ywhaz Msfs1	Rattus norvegicus (Rat)	245
P68511	14-3-3 protein eta	Ywhah	Rattus norvegicus (Rat)	246
P61983	14-3-3 protein gamma [Cleaved into: 14-3-3 protein gamma, N-terminally processed]	Ywhag	Rattus norvegicus (Rat)	247
G3V9A3	RCG31390 (Stratifin)	Sfn rCG_31390	Rattus norvegicus (Rat)	248
Q5EBB0	Similar to 14-3-3 protein sigma	LOC298795	Rattus norvegicus (Rat)	248
P35213	14-3-3 protein beta/alpha (Prepronerve growth factor RNH-1) (Protein kinase C inhibitor protein 1) (KCIP-1) [Cleaved into: 14-3-3 protein beta/alpha, N-terminally processed]	Ywhab	Rattus norvegicus (Rat)	246
2	Protein names	Gene names	Organism	Length
P68255	14-3-3 protein theta (14-3-3 protein tau)	Ywhaq	Rattus norvegicus (Rat)	245
P63102	14-3-3 protein zeta/delta (Mitochondrial import stimulation factor S1 subunit) (Protein kinase C inhibitor protein 1) (KCIP-1)	Ywhaz Msfs1	Rattus norvegicus (Rat)	245
P68511	14-3-3 protein eta	Ywhah	Rattus norvegicus (Rat)	246
P61983	14-3-3 protein gamma [Cleaved into: 14-3-3 protein gamma, N-terminally processed]	Ywhag	Rattus norvegicus (Rat)	247
P63259	Actin, cytoplasmic 2 (Gamma-actin) [Cleaved into: Actin, cytoplasmic 2, N-terminally processed]	Actg1 Actg	Rattus norvegicus (Rat)	375
P60711	Actin, cytoplasmic 1 (Beta-actin) [Cleaved into: Actin, cytoplasmic 1, N-terminally processed]	Actb	Rattus norvegicus (Rat)	375
P35213	14-3-3 protein beta/alpha (Prepronerve growth factor RNH-1) (Protein kinase C inhibitor protein 1) (KCIP-1) [Cleaved into: 14-3-3 protein beta/alpha, N-terminally processed]	Ywhab	Rattus norvegicus (Rat)	246
3	Protein names	Gene names	Organism	Length
P68255	14-3-3 protein theta (14-3-3 protein tau)	Ywhaq	Rattus norvegicus (Rat)	245
P63102	14-3-3 protein zeta/delta (Mitochondrial import stimulation factor S1 subunit) (Protein kinase C inhibitor protein 1) (KCIP-1)	Ywhaz Msfs1	Rattus norvegicus (Rat)	245
P68511	14-3-3 protein eta	Ywhah	Rattus norvegicus (Rat)	246
P61983	14-3-3 protein gamma [Cleaved into: 14-3-3 protein gamma, N-terminally processed]	Ywhag	Rattus norvegicus (Rat)	247
Q5EBB0	Similar to 14-3-3 protein sigma	LOC298795	Rattus norvegicus (Rat)	248
P35213	14-3-3 protein beta/alpha (Prepronerve growth factor RNH-1) (Protein kinase C inhibitor protein 1) (KCIP-1) [Cleaved into: 14-3-3 protein beta/alpha, N-terminally processed]	Ywhab	Rattus norvegicus (Rat)	246
4	Protein names	Gene names	Organism	Length
P68255	14-3-3 protein theta (14-3-3 protein tau)	Ywhaq	Rattus norvegicus (Rat)	245
P63102	14-3-3 protein zeta/delta (Mitochondrial import stimulation factor S1 subunit) (Protein kinase C inhibitor protein 1) (KCIP-1)	Ywhaz Msfs1	Rattus norvegicus (Rat)	245
P68511	14-3-3 protein eta	Ywhah	Rattus norvegicus (Rat)	246
P61983	14-3-3 protein gamma [Cleaved into: 14-3-3 protein gamma, N-terminally processed]	Ywhag	Rattus norvegicus (Rat)	247
Q5EBB0	Similar to 14-3-3 protein sigma	LOC298795	Rattus norvegicus (Rat)	248
P35213	14-3-3 protein beta/alpha (Prepronerve growth factor RNH-1) (Protein kinase C inhibitor protein 1) (KCIP-1) [Cleaved into: 14-3-3 protein beta/alpha, N-terminally processed]	Ywhab	Rattus norvegicus (Rat)	246
5	Protein names	Gene names	Organism	Length
P63269	Actin, gamma-enteric smooth muscle (Alpha-actin-3) (Gamma-2-actin) (Smooth muscle gamma-actin) [Cleaved into: Actin, gamma-enteric smooth muscle, intermediate form]	Actg2 Acta3 Actsg	Rattus norvegicus (Rat)	376
P60711	Actin, cytoplasmic 1 (Beta-actin) [Cleaved into: Actin, cytoplasmic 1, N-terminally processed]	Actb	Rattus norvegicus (Rat)	375
P68136	Actin, alpha skeletal muscle (Alpha-actin-1) [Cleaved into: Actin, alpha skeletal muscle, intermediate form]	Acta1 Acta	Rattus norvegicus (Rat)	377
P62963	Profilin-1 (Profilin I)	Pfn1	Rattus norvegicus (Rat)	140
P63259	Actin, cytoplasmic 2 (Gamma-actin) [Cleaved into: Actin, cytoplasmic 2, N-terminally processed]	Actg1 Actg	Rattus norvegicus (Rat)	375
6	Protein names	Gene names	Organism	Length
Q6P9V9	Tubulin alpha-1B chain (Alpha-tubulin 2) (Tubulin alpha-2 chain) [Cleaved into: Detyrosinated tubulin alpha-1B chain]	Tuba1b Tuba2	Rattus norvegicus (Rat)	451
P63259	Actin, cytoplasmic 2 (Gamma-actin) [Cleaved into: Actin, cytoplasmic 2, N-terminally processed]	Actg1 Actg	Rattus norvegicus (Rat)	375
Q6AYZ1	Tubulin alpha-1C chain (Alpha-tubulin 6) (Tubulin alpha-6 chain) [Cleaved into: Detyrosinated tubulin alpha-1C chain]	Tuba1c Tuba6	Rattus norvegicus (Rat)	449
P68370	Tubulin alpha-1A chain (Alpha-tubulin 1) (Tubulin alpha-1 chain) [Cleaved into: Detyrosinated tubulin alpha-1A chain]	Tuba1a Tuba1	Rattus norvegicus (Rat)	451
P60711	Actin, cytoplasmic 1 (Beta-actin) [Cleaved into: Actin, cytoplasmic 1, N-terminally processed]	Actb	Rattus norvegicus (Rat)	375
7	Protein names	Gene names	Organism	Length
P63269	Actin, gamma-enteric smooth muscle (Alpha-actin-3) (Gamma-2-actin) (Smooth muscle gamma-actin) [Cleaved into: Actin, gamma-enteric smooth muscle, intermediate form]	Actg2 Acta3 Actsg	Rattus norvegicus (Rat)	376
P60711	Actin, cytoplasmic 1 (Beta-actin) [Cleaved into: Actin, cytoplasmic 1, N-terminally processed]	Actb	Rattus norvegicus (Rat)	375
P68136	Actin, alpha skeletal muscle (Alpha-actin-1) [Cleaved into: Actin, alpha skeletal muscle, intermediate form]	Acta1 Acta	Rattus norvegicus (Rat)	377
P63259	Actin, cytoplasmic 2 (Gamma-actin) [Cleaved into: Actin, cytoplasmic 2, N-terminally processed]	Actg1 Actg	Rattus norvegicus (Rat)	375
8	Protein names	Gene names	Organism	Length
Q6P9V9	Tubulin alpha-1B chain (Alpha-tubulin 2) (Tubulin alpha-2 chain) [Cleaved into: Detyrosinated tubulin alpha-1B chain]	Tuba1b Tuba2	Rattus norvegicus (Rat)	451
P68370	Tubulin alpha-1A chain (Alpha-tubulin 1) (Tubulin alpha-1 chain) [Cleaved into: Detyrosinated tubulin alpha-1A chain]	Tuba1a Tuba1	Rattus norvegicus (Rat)	451
B4F7C2	Tubulin beta chain	Tubb4a Tubb4 rCG_45085	Rattus norvegicus (Rat)	444
Q6AYZ1	Tubulin alpha-1C chain (Alpha-tubulin 6) (Tubulin alpha-6 chain) [Cleaved into: Detyrosinated tubulin alpha-1C chain]	Tuba1c Tuba6	Rattus norvegicus (Rat)	449
9	Protein names	Gene names	Organism	Length
P68255	14-3-3 protein theta (14-3-3 protein tau)	Ywhaq	Rattus norvegicus (Rat)	245
P35213	14-3-3 protein beta/alpha (Prepronerve growth factor RNH-1) (Protein kinase C inhibitor protein 1) (KCIP-1) [Cleaved into: 14-3-3 protein beta/alpha, N-terminally processed]	Ywhab	Rattus norvegicus (Rat)	246
P61983	14-3-3 protein gamma [Cleaved into: 14-3-3 protein gamma, N-terminally processed]	Ywhag	Rattus norvegicus (Rat)	247
P63102	14-3-3 protein zeta/delta (Mitochondrial import stimulation factor S1 subunit) (Protein kinase C inhibitor protein 1) (KCIP-1)	Ywhaz Msfs1	Rattus norvegicus (Rat)	245
P68511	14-3-3 protein eta	Ywhah	Rattus norvegicus (Rat)	246
10	Protein names	Gene names	Organism	Length
P60711	Actin, cytoplasmic 1 (Beta-actin) [Cleaved into: Actin, cytoplasmic 1, N-terminally processed]	Actb	Rattus norvegicus (Rat)	375
Q64122	Myosin regulatory light polypeptide 9 (Myosin regulatory light chain 2, smooth muscle isoform) (Myosin regulatory light chain 9)	Myl9 Myrl2	Rattus norvegicus (Rat)	171
P62963	Profilin-1 (Profilin I)	Pfn1	Rattus norvegicus (Rat)	140
P63259	Actin, cytoplasmic 2 (Gamma-actin) [Cleaved into: Actin, cytoplasmic 2, N-terminally processed]	Actg1 Actg	Rattus norvegicus (Rat)	375
11	Protein names	Gene names	Organism	Length
P60711	Actin, cytoplasmic 1 (Beta-actin) [Cleaved into: Actin, cytoplasmic 1, N-terminally processed]	Actb	Rattus norvegicus (Rat)	375
Q64122	Myosin regulatory light polypeptide 9 (Myosin regulatory light chain 2, smooth muscle isoform) (Myosin regulatory light chain 9)	Myl9 Myrl2	Rattus norvegicus (Rat)	171
P63259	Actin, cytoplasmic 2 (Gamma-actin) [Cleaved into: Actin, cytoplasmic 2, N-terminally processed]	Actg1 Actg	Rattus norvegicus (Rat)	375
12	Protein names	Gene names	Organism	Length
P60711	Actin, cytoplasmic 1 (Beta-actin) [Cleaved into: Actin, cytoplasmic 1, N-terminally processed]	Actb	Rattus norvegicus (Rat)	375
Q64122	Myosin regulatory light polypeptide 9 (Myosin regulatory light chain 2, smooth muscle isoform) (Myosin regulatory light chain 9)	Myl9 Myrl2	Rattus norvegicus (Rat)	171
P63259	Actin, cytoplasmic 2 (Gamma-actin) [Cleaved into: Actin, cytoplasmic 2, N-terminally processed]	Actg1 Actg	Rattus norvegicus (Rat)	375
13	Protein names	Gene names	Organism	Length
P60711	Actin, cytoplasmic 1 (Beta-actin) [Cleaved into: Actin, cytoplasmic 1, N-terminally processed]	Actb	Rattus norvegicus (Rat)	375
P62963	Profilin-1 (Profilin I)	Pfn1	Rattus norvegicus (Rat)	140
P63259	Actin, cytoplasmic 2 (Gamma-actin) [Cleaved into: Actin, cytoplasmic 2, N-terminally processed]	Actg1 Actg	Rattus norvegicus (Rat)	375
14	Protein names	Gene names	Organism	Length
P60711	Actin, cytoplasmic 1 (Beta-actin) [Cleaved into: Actin, cytoplasmic 1, N-terminally processed]	Actb	Rattus norvegicus (Rat)	375
P63259	Actin, cytoplasmic 2 (Gamma-actin) [Cleaved into: Actin, cytoplasmic 2, N-terminally processed]	Actg1 Actg	Rattus norvegicus (Rat)	375
15	Protein names	Gene names	Organism	Length
Q5EBB0	Similar to 14-3-3 protein sigma	LOC298795	Rattus norvegicus (Rat)	248
G3V9A3	RCG31390 (Stratifin)	Sfn rCG_31390	Rattus norvegicus (Rat)	248

## Sheet: 21 up  p<0.05
Kobas 21 up	P-Value	Corrected P-Value	-Log10 (p-value)	proteins
Protein processing in endoplasmic reticulum	1.64e-11	1.03e-09	8.98716	Q63081|A0A0G2JSZ5|P63018|P0DMW0|P0DMW1|P06761|P11598|P55063|P82995|P04785|P18418|P14659	1
Antigen processing and presentation	9.82e-10	4.43e-08	7.3536	P18418|P63018|P0DMW0|P0DMW1|P06761|P11598|P55063|P82995|P14659	2
Metabolism of xenobiotics by cytochrome P450	1.86e-06	4.79e-05	4.31966	A0A0G2K658|P47727|B2GV72|P08009|Q5BK56|P08010	3
Endocytosis	4.57e-06	0.00010644	3.9729	P63018|P35280|P0DMW0|P0DMW1|P55063|Q5U316|P84083|P14659|Q5RKJ9	4
Estrogen signaling pathway	8.84e-06	0.00019773	3.70393	P63018|P0DMW0|P0DMW1|P55063|P82995|P14659	5
Longevity regulating pathway - multiple species	1.47e-05	0.000295665	3.5292	P14659|P55063|P0DMW0|P0DMW1|P63018	6
Apoptosis signaling pathway	5.47e-05	0.000930209	3.03142	P14659|P0DMW0|P0DMW1|P06761|P63018	7
Chemical carcinogenesis	0.000103978	0.00161029	2.79309	P47727|P08009|Q5BK56|P08010|A0A0G2K658	8
Spliceosome	0.000269142	0.00337	2.47237	P14659|P55063|P0DMW0|P0DMW1|P63018	9
Glutathione metabolism	0.00345267	0.0197992	1.70335	Q5BK56|P08010|P08009	10
Arachidonic acid metabolism	0.00497552	0.0254064	1.59506	P47727|B2GV72|A0A0G2K658	11
Drug metabolism - cytochrome P450	0.00605551	0.0293005	1.53313	Q5BK56|P08010|P08009	12
MAPK signaling pathway	0.00629506	0.030242	1.51939	P14659|P55063|P0DMW0|P0DMW1|P63018	13
1	Protein names	Gene names	Organism	Length
Q63081	Protein disulfide-isomerase A6 (EC 5.3.4.1) (Calcium-binding protein 1) (CaBP1) (Protein disulfide isomerase P5) (Thioredoxin domain-containing protein 7)	Pdia6 Cabp1 Txndc7	Rattus norvegicus (Rat)	440
A0A0G2JSZ5	Protein disulfide-isomerase A6 (RCG62282, isoform CRA_a)	Pdia6 rCG_62282	Rattus norvegicus (Rat)	445
P63018	Heat shock cognate 71 kDa protein (Heat shock 70 kDa protein 8)	Hspa8 Hsc70 Hsc73	Rattus norvegicus (Rat)	646
P0DMW0	Heat shock 70 kDa protein 1A (Heat shock 70 kDa protein 2) (HSP70-2) (HSP70.2)	Hspa1a Hsp70-1 Hspa1	Rattus norvegicus (Rat)	641
P0DMW1	Heat shock 70 kDa protein 1B (Heat shock 70 kDa protein 1) (HSP70-1) (HSP70.1)	Hspa1b Hsp70-2 Hspa2	Rattus norvegicus (Rat)	641
P06761	Endoplasmic reticulum chaperone BiP (EC 3.6.4.10) (78 kDa glucose-regulated protein) (GRP-78) (Binding-immunoglobulin protein) (BiP) (Heat shock protein 70 family protein 5) (HSP70 family protein 5) (Heat shock protein family A member 5) (Immunoglobulin heavy chain-binding protein) (Steroidogenesis-activator polypeptide)	Hspa5 Grp78	Rattus norvegicus (Rat)	654
P11598	Protein disulfide-isomerase A3 (EC 5.3.4.1) (58 kDa glucose-regulated protein) (58 kDa microsomal protein) (p58) (Disulfide isomerase ER-60) (Endoplasmic reticulum resident protein 57) (ER protein 57) (ERp57) (Endoplasmic reticulum resident protein 60) (ER protein 60) (ERp60) (HIP-70) (Q-2)	Pdia3 Erp60 Grp58	Rattus norvegicus (Rat)	505
P55063	Heat shock 70 kDa protein 1-like (Heat shock 70 kDa protein 1L) (Heat shock 70 kDa protein 3) (HSP70.3)	Hspa1l Hsp70-3	Rattus norvegicus (Rat)	641
P82995	Heat shock protein HSP 90-alpha (Heat shock 86 kDa) (HSP 86) (HSP86)	Hsp90aa1 Hsp86 Hspca	Rattus norvegicus (Rat)	733
P04785	Protein disulfide-isomerase (PDI) (EC 5.3.4.1) (Cellular thyroid hormone-binding protein) (Prolyl 4-hydroxylase subunit beta)	P4hb Pdia1	Rattus norvegicus (Rat)	509
P18418	Calreticulin (CALBP) (CRP55) (Calcium-binding protein 3) (CABP3) (Calregulin) (Endoplasmic reticulum resident protein 60) (ERp60) (HACBP)	Calr	Rattus norvegicus (Rat)	416
P14659	Heat shock-related 70 kDa protein 2 (Heat shock protein 70.2) (Testis-specific heat shock protein-related) (HST)	Hspa2 Hst70	Rattus norvegicus (Rat)	633
2	Protein names	Gene names	Organism	Length
P18418	Calreticulin (CALBP) (CRP55) (Calcium-binding protein 3) (CABP3) (Calregulin) (Endoplasmic reticulum resident protein 60) (ERp60) (HACBP)	Calr	Rattus norvegicus (Rat)	416
P63018	Heat shock cognate 71 kDa protein (Heat shock 70 kDa protein 8)	Hspa8 Hsc70 Hsc73	Rattus norvegicus (Rat)	646
P0DMW0	Heat shock 70 kDa protein 1A (Heat shock 70 kDa protein 2) (HSP70-2) (HSP70.2)	Hspa1a Hsp70-1 Hspa1	Rattus norvegicus (Rat)	641
P0DMW1	Heat shock 70 kDa protein 1B (Heat shock 70 kDa protein 1) (HSP70-1) (HSP70.1)	Hspa1b Hsp70-2 Hspa2	Rattus norvegicus (Rat)	641
P06761	Endoplasmic reticulum chaperone BiP (EC 3.6.4.10) (78 kDa glucose-regulated protein) (GRP-78) (Binding-immunoglobulin protein) (BiP) (Heat shock protein 70 family protein 5) (HSP70 family protein 5) (Heat shock protein family A member 5) (Immunoglobulin heavy chain-binding protein) (Steroidogenesis-activator polypeptide)	Hspa5 Grp78	Rattus norvegicus (Rat)	654
P11598	Protein disulfide-isomerase A3 (EC 5.3.4.1) (58 kDa glucose-regulated protein) (58 kDa microsomal protein) (p58) (Disulfide isomerase ER-60) (Endoplasmic reticulum resident protein 57) (ER protein 57) (ERp57) (Endoplasmic reticulum resident protein 60) (ER protein 60) (ERp60) (HIP-70) (Q-2)	Pdia3 Erp60 Grp58	Rattus norvegicus (Rat)	505
P55063	Heat shock 70 kDa protein 1-like (Heat shock 70 kDa protein 1L) (Heat shock 70 kDa protein 3) (HSP70.3)	Hspa1l Hsp70-3	Rattus norvegicus (Rat)	641
P82995	Heat shock protein HSP 90-alpha (Heat shock 86 kDa) (HSP 86) (HSP86)	Hsp90aa1 Hsp86 Hspca	Rattus norvegicus (Rat)	733
P14659	Heat shock-related 70 kDa protein 2 (Heat shock protein 70.2) (Testis-specific heat shock protein-related) (HST)	Hspa2 Hst70	Rattus norvegicus (Rat)	633
3	Protein names	Gene names	Organism	Length
A0A0G2K658	Carbonyl reductase [NADPH] 1-like	LOC102556347	Rattus norvegicus (Rat)	329
P47727	Carbonyl reductase [NADPH] 1 (EC 1.1.1.184) (15-hydroxyprostaglandin dehydrogenase [NADP(+)]) (EC 1.1.1.197) (20-beta-hydroxysteroid dehydrogenase) (NADPH-dependent carbonyl reductase 1) (Prostaglandin 9-ketoreductase) (Prostaglandin-E(2) 9-reductase) (EC 1.1.1.189)	Cbr1 Cbr	Rattus norvegicus (Rat)	277
B2GV72	Carbonyl reductase 3 (Carbonyl reductase 3 (Predicted))	Cbr3 Cbr3_predicted rCG_53069	Rattus norvegicus (Rat)	277
P08009	Glutathione S-transferase Yb-3 (EC 2.5.1.18) (Chain 4) (GST Yb3) (GST class-mu 3)	Gstm3	Rattus norvegicus (Rat)	218
Q5BK56	Glutathione S-transferase (EC 2.5.1.18)	Gstm4 MGC108896 rCG_29014	Rattus norvegicus (Rat)	218
P08010	Glutathione S-transferase Mu 2 (EC 2.5.1.18) (GST 4-4) (GSTM2-2) (Glutathione S-transferase Yb-2) (GST Yb2)	Gstm2	Rattus norvegicus (Rat)	218
4	Protein names	Gene names	Organism	Length
P63018	Heat shock cognate 71 kDa protein (Heat shock 70 kDa protein 8)	Hspa8 Hsc70 Hsc73	Rattus norvegicus (Rat)	646
P35280	Ras-related protein Rab-8A	Rab8a Rab8	Rattus norvegicus (Rat)	207
P0DMW0	Heat shock 70 kDa protein 1A (Heat shock 70 kDa protein 2) (HSP70-2) (HSP70.2)	Hspa1a Hsp70-1 Hspa1	Rattus norvegicus (Rat)	641
P0DMW1	Heat shock 70 kDa protein 1B (Heat shock 70 kDa protein 1) (HSP70-1) (HSP70.1)	Hspa1b Hsp70-2 Hspa2	Rattus norvegicus (Rat)	641
P55063	Heat shock 70 kDa protein 1-like (Heat shock 70 kDa protein 1L) (Heat shock 70 kDa protein 3) (HSP70.3)	Hspa1l Hsp70-3	Rattus norvegicus (Rat)	641
Q5U316	Ras-related protein Rab-35	Rab35	Rattus norvegicus (Rat)	201
P84083	ADP-ribosylation factor 5	Arf5	Rattus norvegicus (Rat)	180
P14659	Heat shock-related 70 kDa protein 2 (Heat shock protein 70.2) (Testis-specific heat shock protein-related) (HST)	Hspa2 Hst70	Rattus norvegicus (Rat)	633
Q5RKJ9	RAB10, member RAS oncogene family (RAB10, member RAS oncogene family, isoform CRA_a) (Ras-related protein Rab-10)	Rab10 rCG_61836	Rattus norvegicus (Rat)	200
5	Protein names	Gene names	Organism	Length
P63018	Heat shock cognate 71 kDa protein (Heat shock 70 kDa protein 8)	Hspa8 Hsc70 Hsc73	Rattus norvegicus (Rat)	646
P0DMW0	Heat shock 70 kDa protein 1A (Heat shock 70 kDa protein 2) (HSP70-2) (HSP70.2)	Hspa1a Hsp70-1 Hspa1	Rattus norvegicus (Rat)	641
P0DMW1	Heat shock 70 kDa protein 1B (Heat shock 70 kDa protein 1) (HSP70-1) (HSP70.1)	Hspa1b Hsp70-2 Hspa2	Rattus norvegicus (Rat)	641
P55063	Heat shock 70 kDa protein 1-like (Heat shock 70 kDa protein 1L) (Heat shock 70 kDa protein 3) (HSP70.3)	Hspa1l Hsp70-3	Rattus norvegicus (Rat)	641
P82995	Heat shock protein HSP 90-alpha (Heat shock 86 kDa) (HSP 86) (HSP86)	Hsp90aa1 Hsp86 Hspca	Rattus norvegicus (Rat)	733
P14659	Heat shock-related 70 kDa protein 2 (Heat shock protein 70.2) (Testis-specific heat shock protein-related) (HST)	Hspa2 Hst70	Rattus norvegicus (Rat)	633
6	Protein names	Gene names	Organism	Length
P14659	Heat shock-related 70 kDa protein 2 (Heat shock protein 70.2) (Testis-specific heat shock protein-related) (HST)	Hspa2 Hst70	Rattus norvegicus (Rat)	633
P55063	Heat shock 70 kDa protein 1-like (Heat shock 70 kDa protein 1L) (Heat shock 70 kDa protein 3) (HSP70.3)	Hspa1l Hsp70-3	Rattus norvegicus (Rat)	641
P0DMW0	Heat shock 70 kDa protein 1A (Heat shock 70 kDa protein 2) (HSP70-2) (HSP70.2)	Hspa1a Hsp70-1 Hspa1	Rattus norvegicus (Rat)	641
P0DMW1	Heat shock 70 kDa protein 1B (Heat shock 70 kDa protein 1) (HSP70-1) (HSP70.1)	Hspa1b Hsp70-2 Hspa2	Rattus norvegicus (Rat)	641
P63018	Heat shock cognate 71 kDa protein (Heat shock 70 kDa protein 8)	Hspa8 Hsc70 Hsc73	Rattus norvegicus (Rat)	646
7	Protein names	Gene names	Organism	Length
P14659	Heat shock-related 70 kDa protein 2 (Heat shock protein 70.2) (Testis-specific heat shock protein-related) (HST)	Hspa2 Hst70	Rattus norvegicus (Rat)	633
P0DMW0	Heat shock 70 kDa protein 1A (Heat shock 70 kDa protein 2) (HSP70-2) (HSP70.2)	Hspa1a Hsp70-1 Hspa1	Rattus norvegicus (Rat)	641
P0DMW1	Heat shock 70 kDa protein 1B (Heat shock 70 kDa protein 1) (HSP70-1) (HSP70.1)	Hspa1b Hsp70-2 Hspa2	Rattus norvegicus (Rat)	641
P06761	Endoplasmic reticulum chaperone BiP (EC 3.6.4.10) (78 kDa glucose-regulated protein) (GRP-78) (Binding-immunoglobulin protein) (BiP) (Heat shock protein 70 family protein 5) (HSP70 family protein 5) (Heat shock protein family A member 5) (Immunoglobulin heavy chain-binding protein) (Steroidogenesis-activator polypeptide)	Hspa5 Grp78	Rattus norvegicus (Rat)	654
P63018	Heat shock cognate 71 kDa protein (Heat shock 70 kDa protein 8)	Hspa8 Hsc70 Hsc73	Rattus norvegicus (Rat)	646
8	Protein names	Gene names	Organism	Length
P47727	Carbonyl reductase [NADPH] 1 (EC 1.1.1.184) (15-hydroxyprostaglandin dehydrogenase [NADP(+)]) (EC 1.1.1.197) (20-beta-hydroxysteroid dehydrogenase) (NADPH-dependent carbonyl reductase 1) (Prostaglandin 9-ketoreductase) (Prostaglandin-E(2) 9-reductase) (EC 1.1.1.189)	Cbr1 Cbr	Rattus norvegicus (Rat)	277
P08009	Glutathione S-transferase Yb-3 (EC 2.5.1.18) (Chain 4) (GST Yb3) (GST class-mu 3)	Gstm3	Rattus norvegicus (Rat)	218
Q5BK56	Glutathione S-transferase (EC 2.5.1.18)	Gstm4 MGC108896 rCG_29014	Rattus norvegicus (Rat)	218
P08010	Glutathione S-transferase Mu 2 (EC 2.5.1.18) (GST 4-4) (GSTM2-2) (Glutathione S-transferase Yb-2) (GST Yb2)	Gstm2	Rattus norvegicus (Rat)	218
A0A0G2K658	Carbonyl reductase [NADPH] 1-like	LOC102556347	Rattus norvegicus (Rat)	329
9	Protein names	Gene names	Organism	Length
P14659	Heat shock-related 70 kDa protein 2 (Heat shock protein 70.2) (Testis-specific heat shock protein-related) (HST)	Hspa2 Hst70	Rattus norvegicus (Rat)	633
P55063	Heat shock 70 kDa protein 1-like (Heat shock 70 kDa protein 1L) (Heat shock 70 kDa protein 3) (HSP70.3)	Hspa1l Hsp70-3	Rattus norvegicus (Rat)	641
P0DMW0	Heat shock 70 kDa protein 1A (Heat shock 70 kDa protein 2) (HSP70-2) (HSP70.2)	Hspa1a Hsp70-1 Hspa1	Rattus norvegicus (Rat)	641
P0DMW1	Heat shock 70 kDa protein 1B (Heat shock 70 kDa protein 1) (HSP70-1) (HSP70.1)	Hspa1b Hsp70-2 Hspa2	Rattus norvegicus (Rat)	641
P63018	Heat shock cognate 71 kDa protein (Heat shock 70 kDa protein 8)	Hspa8 Hsc70 Hsc73	Rattus norvegicus (Rat)	646
10	Protein names	Gene names	Organism	Length
Q5BK56	Glutathione S-transferase (EC 2.5.1.18)	Gstm4 MGC108896 rCG_29014	Rattus norvegicus (Rat)	218
P08010	Glutathione S-transferase Mu 2 (EC 2.5.1.18) (GST 4-4) (GSTM2-2) (Glutathione S-transferase Yb-2) (GST Yb2)	Gstm2	Rattus norvegicus (Rat)	218
P08009	Glutathione S-transferase Yb-3 (EC 2.5.1.18) (Chain 4) (GST Yb3) (GST class-mu 3)	Gstm3	Rattus norvegicus (Rat)	218
11	Protein names	Gene names	Organism	Length
P47727	Carbonyl reductase [NADPH] 1 (EC 1.1.1.184) (15-hydroxyprostaglandin dehydrogenase [NADP(+)]) (EC 1.1.1.197) (20-beta-hydroxysteroid dehydrogenase) (NADPH-dependent carbonyl reductase 1) (Prostaglandin 9-ketoreductase) (Prostaglandin-E(2) 9-reductase) (EC 1.1.1.189)	Cbr1 Cbr	Rattus norvegicus (Rat)	277
B2GV72	Carbonyl reductase 3 (Carbonyl reductase 3 (Predicted))	Cbr3 Cbr3_predicted rCG_53069	Rattus norvegicus (Rat)	277
A0A0G2K658	Carbonyl reductase [NADPH] 1-like	LOC102556347	Rattus norvegicus (Rat)	329
12	Protein names	Gene names	Organism	Length
Q5BK56	Glutathione S-transferase (EC 2.5.1.18)	Gstm4 MGC108896 rCG_29014	Rattus norvegicus (Rat)	218
P08010	Glutathione S-transferase Mu 2 (EC 2.5.1.18) (GST 4-4) (GSTM2-2) (Glutathione S-transferase Yb-2) (GST Yb2)	Gstm2	Rattus norvegicus (Rat)	218
P08009	Glutathione S-transferase Yb-3 (EC 2.5.1.18) (Chain 4) (GST Yb3) (GST class-mu 3)	Gstm3	Rattus norvegicus (Rat)	218

## Sheet: 540 down p<0.05
Term	p value	Corrected P-Value	-Log10 (p-value)	proteins	proteins name
Cytoskeletal regulation by Rho GTPase	3.18e-14	1.18e-11	10.9281	D3ZRN3|P69897|P85108|Q3KRE8|P63259|P60711|Q4QQV0|Q6P9T8|Q4QRB4|Q9JLT0	1
Phagosome	7.32e-10	1.14e-07	6.9431	P01026|B4F7C2|P69897|P85108|Q3KRE8|P63259|M0RBF1|P60711|Q4QQV0|Q6P9T8|Q4QRB4	3
Gap junction	2.56e-07	2.75e-05	4.56067	Q6P9T8|P69897|P85108|Q3KRE8|Q4QQV0|B4F7C2|Q4QRB4	4
Glycolysis/Gluconeogenesis	7.82e-07	7.88e-05	4.10347	P11884|P11980|Q6AY07|P09117|Q498M9|P04797	5
Biosynthesis of amino acids	3.02e-05	0.00123164	2.90951	P09117|Q6AY07|Q498M9|P11980|P04797	6
Carbon metabolism	0.00019325	0.00491873	2.30815	P09117|Q6AY07|Q498M9|P11980|P04797	7
Fructose galactose metabolism	0.000728359	0.012535	1.90187	Q6AY07|P09117	8
Regulation of actin cytoskeleton	0.0025739	0.0309292	1.50963	P60711|Q9JLT0|D3ZFU9|O35763|P63259	9
Glycolysis	0.0027025	0.0315684	1.50075	P04797|Q6AY07	10
Cadherin signaling pathway	0.00416907	0.0436399	1.36012	P60711|D3ZRN3|P63259	11
1	Protein names	Gene names		Organism	Length
D3ZRN3	Actin, beta-like 2 (Similar to cytoplasmic beta-actin (Predicted))	Actbl2 RGD1309504_predicted rCG_44795		Rattus norvegicus (Rat)	376
P69897	Tubulin beta-5 chain	Tubb5		Rattus norvegicus (Rat)	444
P85108	Tubulin beta-2A chain	Tubb2a		Rattus norvegicus (Rat)	445
Q3KRE8	Tubulin beta-2B chain (T beta-15)	Tubb2b Tubb2a		Rattus norvegicus (Rat)	445
P63259	Actin, cytoplasmic 2 (Gamma-actin) [Cleaved into: Actin, cytoplasmic 2, N-terminally processed]	Actg1 Actg		Rattus norvegicus (Rat)	375
P60711	Actin, cytoplasmic 1 (Beta-actin) [Cleaved into: Actin, cytoplasmic 1, N-terminally processed]	Actb		Rattus norvegicus (Rat)	375
Q4QQV0	Tubulin beta chain	Tubb6 rCG_46689		Rattus norvegicus (Rat)	447
Q6P9T8	Tubulin beta-4B chain (Tubulin beta-2C chain)	Tubb4b Tubb2c		Rattus norvegicus (Rat)	445
Q4QRB4	Tubulin beta-3 chain (Neuron-specific class III beta-tubulin)	Tubb3		Rattus norvegicus (Rat)	450
Q9JLT0	Myosin-10 (Cellular myosin heavy chain, type B) (Myosin heavy chain 10) (Myosin heavy chain, non-muscle IIb) (Non-muscle myosin heavy chain B) (NMMHC-B) (Non-muscle myosin heavy chain IIb)	Myh10		Rattus norvegicus (Rat)	1976
2	Protein names	Gene names		Organism	Length
P01026	Complement C3 [Cleaved into: Complement C3 beta chain; C3-beta-c (C3bc) (Neutrophil chemotactic factor-2) (ENCF-2); Complement C3 alpha chain; C3a anaphylatoxin (Neutrophil chemotactic factor-1) (ENCF-1); Acylation stimulating protein (ASP) (C3adesArg); Complement C3b alpha' chain; Complement C3c alpha' chain fragment 1; Complement C3dg fragment; Complement C3g fragment; Complement C3d fragment; …	C3		Rattus norvegicus (Rat)	1663
M0R4L7	Histone H2B	Hist1h2bl		Rattus norvegicus (Rat)	126
P11980	Pyruvate kinase PKM (EC 2.7.1.40) (Pyruvate kinase muscle isozyme)	Pkm Pkm2 Pykm		Rattus norvegicus (Rat)	531
A0A0G2JXE0	Histone H2B	LOC102549061		Rattus norvegicus (Rat)	126
M0RBF1	Complement C3 (RCG45082)	C3 rCG_45082		Rattus norvegicus (Rat)	1663
G3V8B3	Histone H2B	Hist1h2bq Hist1h2bc Hist1h2bcl1 Hist1h2bp_predicted LOC100364835 LOC100365043 LOC100910200 LOC684797 rCG_45129 rCG_45162 rCG_45199 rCG_45211 rCG_45227		Rattus norvegicus (Rat)	126
D3ZWM5	Histone H2B	Hist1h2bd rCG_23124		Rattus norvegicus (Rat)	126
D4A817	Histone H2B	Hist2h2be		Rattus norvegicus (Rat)	126
D3ZNH4	Histone H2B	Hist1h2bo rCG_23099		Rattus norvegicus (Rat)	138
Q00715	Histone H2B type 1			Rattus norvegicus (Rat)	125
D3ZNZ9	Histone H2B	Hist3h2ba rCG_34360		Rattus norvegicus (Rat)	126
M0RBQ5	Histone H2B	Hist3h2bb rCG_32940		Rattus norvegicus (Rat)	126
3	Protein names	Gene names		Organism	Length
P01026	Complement C3 [Cleaved into: Complement C3 beta chain; C3-beta-c (C3bc) (Neutrophil chemotactic factor-2) (ENCF-2); Complement C3 alpha chain; C3a anaphylatoxin (Neutrophil chemotactic factor-1) (ENCF-1); Acylation stimulating protein (ASP) (C3adesArg); Complement C3b alpha' chain; Complement C3c alpha' chain fragment 1; Complement C3dg fragment; Complement C3g fragment; Complement C3d fragment; …	C3		Rattus norvegicus (Rat)	1663
B4F7C2	Tubulin beta chain	Tubb4a Tubb4 rCG_45085		Rattus norvegicus (Rat)	444
P69897	Tubulin beta-5 chain	Tubb5		Rattus norvegicus (Rat)	444
P85108	Tubulin beta-2A chain	Tubb2a		Rattus norvegicus (Rat)	445
Q3KRE8	Tubulin beta-2B chain (T beta-15)	Tubb2b Tubb2a		Rattus norvegicus (Rat)	445
P63259	Actin, cytoplasmic 2 (Gamma-actin) [Cleaved into: Actin, cytoplasmic 2, N-terminally processed]	Actg1 Actg		Rattus norvegicus (Rat)	375
M0RBF1	Complement C3 (RCG45082)	C3 rCG_45082		Rattus norvegicus (Rat)	1663
P60711	Actin, cytoplasmic 1 (Beta-actin) [Cleaved into: Actin, cytoplasmic 1, N-terminally processed]	Actb		Rattus norvegicus (Rat)	375
Q4QQV0	Tubulin beta chain	Tubb6 rCG_46689		Rattus norvegicus (Rat)	447
Q6P9T8	Tubulin beta-4B chain (Tubulin beta-2C chain)	Tubb4b Tubb2c		Rattus norvegicus (Rat)	445
Q4QRB4	Tubulin beta-3 chain (Neuron-specific class III beta-tubulin)	Tubb3		Rattus norvegicus (Rat)	450
4	Protein names	Gene names		Organism	Length
Q6P9T8	Tubulin beta-4B chain (Tubulin beta-2C chain)	Tubb4b Tubb2c		Rattus norvegicus (Rat)	445
P69897	Tubulin beta-5 chain	Tubb5		Rattus norvegicus (Rat)	444
P85108	Tubulin beta-2A chain	Tubb2a		Rattus norvegicus (Rat)	445
Q3KRE8	Tubulin beta-2B chain (T beta-15)	Tubb2b Tubb2a		Rattus norvegicus (Rat)	445
Q4QQV0	Tubulin beta chain	Tubb6 rCG_46689		Rattus norvegicus (Rat)	447
B4F7C2	Tubulin beta chain	Tubb4a Tubb4 rCG_45085		Rattus norvegicus (Rat)	444
Q4QRB4	Tubulin beta-3 chain (Neuron-specific class III beta-tubulin)	Tubb3		Rattus norvegicus (Rat)	450
5	Protein names	Gene names		Organism	Length
P11884	Aldehyde dehydrogenase, mitochondrial (EC 1.2.1.3) (ALDH class 2) (ALDH-E2) (ALDH1)	Aldh2		Rattus norvegicus (Rat)	519
P11980	Pyruvate kinase PKM (EC 2.7.1.40) (Pyruvate kinase muscle isozyme)	Pkm Pkm2 Pykm		Rattus norvegicus (Rat)	531
Q6AY07	Fructose-bisphosphate aldolase (EC 4.1.2.13)	Aldoart2 Aldoal1 Aldoart1 rCG_62051		Rattus norvegicus (Rat)	364
P09117	Fructose-bisphosphate aldolase C (EC 4.1.2.13) (Brain-type aldolase)	Aldoc		Rattus norvegicus (Rat)	363
Q498M9	Similar to glyceraldehyde-3-phosphate dehydrogenase	LOC303448		Rattus norvegicus (Rat)	335
P04797	Glyceraldehyde-3-phosphate dehydrogenase (GAPDH) (EC 1.2.1.12) (38 kDa BFA-dependent ADP-ribosylation substrate) (BARS-38) (Peptidyl-cysteine S-nitrosylase GAPDH) (EC 2.6.99.-)	Gapdh Gapd		Rattus norvegicus (Rat)	333
6	Protein names	Gene names		Organism	Length
P09117	Fructose-bisphosphate aldolase C (EC 4.1.2.13) (Brain-type aldolase)	Aldoc		Rattus norvegicus (Rat)	363
Q6AY07	Fructose-bisphosphate aldolase (EC 4.1.2.13)	Aldoart2 Aldoal1 Aldoart1 rCG_62051		Rattus norvegicus (Rat)	364
Q498M9	Similar to glyceraldehyde-3-phosphate dehydrogenase	LOC303448		Rattus norvegicus (Rat)	335
P11980	Pyruvate kinase PKM (EC 2.7.1.40) (Pyruvate kinase muscle isozyme)	Pkm Pkm2 Pykm		Rattus norvegicus (Rat)	531
P04797	Glyceraldehyde-3-phosphate dehydrogenase (GAPDH) (EC 1.2.1.12) (38 kDa BFA-dependent ADP-ribosylation substrate) (BARS-38) (Peptidyl-cysteine S-nitrosylase GAPDH) (EC 2.6.99.-)	Gapdh Gapd		Rattus norvegicus (Rat)	333
7	Protein names	Gene names		Organism	Length
P09117	Fructose-bisphosphate aldolase C (EC 4.1.2.13) (Brain-type aldolase)	Aldoc		Rattus norvegicus (Rat)	363
Q6AY07	Fructose-bisphosphate aldolase (EC 4.1.2.13)	Aldoart2 Aldoal1 Aldoart1 rCG_62051		Rattus norvegicus (Rat)	364
Q498M9	Similar to glyceraldehyde-3-phosphate dehydrogenase	LOC303448		Rattus norvegicus (Rat)	335
P11980	Pyruvate kinase PKM (EC 2.7.1.40) (Pyruvate kinase muscle isozyme)	Pkm Pkm2 Pykm		Rattus norvegicus (Rat)	531
P04797	Glyceraldehyde-3-phosphate dehydrogenase (GAPDH) (EC 1.2.1.12) (38 kDa BFA-dependent ADP-ribosylation substrate) (BARS-38) (Peptidyl-cysteine S-nitrosylase GAPDH) (EC 2.6.99.-)	Gapdh Gapd		Rattus norvegicus (Rat)	333
8	Protein names	Gene names		Organism	Length
Q6AY07	Fructose-bisphosphate aldolase (EC 4.1.2.13)	Aldoart2 Aldoal1 Aldoart1 rCG_62051		Rattus norvegicus (Rat)	364
P09117	Fructose-bisphosphate aldolase C (EC 4.1.2.13) (Brain-type aldolase)	Aldoc		Rattus norvegicus (Rat)	363
9	Protein names	Gene names		Organism	Length
P60711	Actin, cytoplasmic 1 (Beta-actin) [Cleaved into: Actin, cytoplasmic 1, N-terminally processed]	Actb		Rattus norvegicus (Rat)	375
Q9JLT0	Myosin-10 (Cellular myosin heavy chain, type B) (Myosin heavy chain 10) (Myosin heavy chain, non-muscle IIb) (Non-muscle myosin heavy chain B) (NMMHC-B) (Non-muscle myosin heavy chain IIb) (NMMHC II-b) (NMMHC-IIB)	Myh10		Rattus norvegicus (Rat)	1976
D3ZFU9	Myosin light chain kinase	Mylk		Rattus norvegicus (Rat)	1961
O35763	Moesin (Membrane-organizing extension spike protein)	Msn		Rattus norvegicus (Rat)	577
P63259	Actin, cytoplasmic 2 (Gamma-actin) [Cleaved into: Actin, cytoplasmic 2, N-terminally processed]	Actg1 Actg		Rattus norvegicus (Rat)	375
10	Protein names	Gene names		Organism	Length
P04797	Glyceraldehyde-3-phosphate dehydrogenase (GAPDH) (EC 1.2.1.12) (38 kDa BFA-dependent ADP-ribosylation substrate) (BARS-38) (Peptidyl-cysteine S-nitrosylase GAPDH) (EC 2.6.99.-)	Gapdh Gapd		Rattus norvegicus (Rat)	333
Q6AY07	Fructose-bisphosphate aldolase (EC 4.1.2.13)	Aldoart2 Aldoal1 Aldoart1 rCG_62051		Rattus norvegicus (Rat)	364
11	Protein names	Gene names		Organism	Length
P60711	Actin, cytoplasmic 1 (Beta-actin) [Cleaved into: Actin, cytoplasmic 1, N-terminally processed]	Actb		Rattus norvegicus (Rat)	375
D3ZRN3	Actin, beta-like 2 (Similar to cytoplasmic beta-actin (Predicted))	Actbl2 RGD1309504_predicted rCG_44795		Rattus norvegicus (Rat)	376
P63259	Actin, cytoplasmic 2 (Gamma-actin) [Cleaved into: Actin, cytoplasmic 2, N-terminally processed]	Actg1 Actg		Rattus norvegicus (Rat)	375

## Sheet: 540 up p<0.05
Term	p value	Corrected P-Value	-Log10 (p-value)	proteins	proteins name
Metabolism of xenobiotics by cytochrome P450	1.3e-07	7.01e-06	5.15428	A0A0G2K658|B0BN47|P04906|P47727|P08009|Q5BK56|P08010	1
Chemical carcinogenesis	6.68e-07	3.14e-05	4.50307	A0A0G2K658|B0BN47|P04906|P47727|P08009|Q5BK56|P08010	2
Glutathione metabolism	1.88e-05	0.000531788	3.27426	P08010|B0BN47|Q5BK56|P04906|P08009	3
Drug metabolism - cytochrome P450	4.86e-05	0.00120042	2.92067	P08010|B0BN47|Q5BK56|P04906|P08009	4
Platinum drug resistance	7.66e-05	0.0017724	2.75144	P08010|B0BN47|Q5BK56|P04906|P08009	5
Protein processing in endoplasmic reticulum	0.000140656	0.00280404	2.55222	P18418|Q63081|P06761|Q63617|A0A0G2JSZ5|P04785	6
1	Protein names	Gene names		Organism	Length
A0A0G2K658	Carbonyl reductase [NADPH] 1-like	LOC102556347		Rattus norvegicus (Rat)	329
B0BN47	Glutathione S-transferase (EC 2.5.1.18)	Gstm6 rCG_28718		Rattus norvegicus (Rat)	218
P04906	Glutathione S-transferase P (EC 2.5.1.18) (Chain 7) (GST 7-7) (GST class-pi)	Gstp1		Rattus norvegicus (Rat)	210
P47727	Carbonyl reductase [NADPH] 1 (EC 1.1.1.184) (15-hydroxyprostaglandin dehydrogenase [NADP(+)]) (EC 1.1.1.197) (20-beta-hydroxysteroid dehydrogenase) (NADPH-dependent carbonyl reductase 1) (Prostaglandin 9-ketoreductase) (Prostaglandin-E(2) 9-reductase) (EC 1.1.1.189)	Cbr1 Cbr		Rattus norvegicus (Rat)	277
P08009	Glutathione S-transferase Yb-3 (EC 2.5.1.18) (Chain 4) (GST Yb3) (GST class-mu 3)	Gstm3		Rattus norvegicus (Rat)	218
Q5BK56	Glutathione S-transferase (EC 2.5.1.18)	Gstm4 MGC108896 rCG_29014		Rattus norvegicus (Rat)	218
P08010	Glutathione S-transferase Mu 2 (EC 2.5.1.18) (GST 4-4) (GSTM2-2) (Glutathione S-transferase Yb-2) (GST Yb2)	Gstm2		Rattus norvegicus (Rat)	218
2	Protein names	Gene names		Organism	Length
A0A0G2K658	Carbonyl reductase [NADPH] 1-like	LOC102556347		Rattus norvegicus (Rat)	329
B0BN47	Glutathione S-transferase (EC 2.5.1.18)	Gstm6 rCG_28718		Rattus norvegicus (Rat)	218
P04906	Glutathione S-transferase P (EC 2.5.1.18) (Chain 7) (GST 7-7) (GST class-pi)	Gstp1		Rattus norvegicus (Rat)	210
P47727	Carbonyl reductase [NADPH] 1 (EC 1.1.1.184) (15-hydroxyprostaglandin dehydrogenase [NADP(+)]) (EC 1.1.1.197) (20-beta-hydroxysteroid dehydrogenase) (NADPH-dependent carbonyl reductase 1) (Prostaglandin 9-ketoreductase) (Prostaglandin-E(2) 9-reductase) (EC 1.1.1.189)	Cbr1 Cbr		Rattus norvegicus (Rat)	277
P08009	Glutathione S-transferase Yb-3 (EC 2.5.1.18) (Chain 4) (GST Yb3) (GST class-mu 3)	Gstm3		Rattus norvegicus (Rat)	218
Q5BK56	Glutathione S-transferase (EC 2.5.1.18)	Gstm4 MGC108896 rCG_29014		Rattus norvegicus (Rat)	218
P08010	Glutathione S-transferase Mu 2 (EC 2.5.1.18) (GST 4-4) (GSTM2-2) (Glutathione S-transferase Yb-2) (GST Yb2)	Gstm2		Rattus norvegicus (Rat)	218
3	Protein names	Gene names		Organism	Length
P08010	Glutathione S-transferase Mu 2 (EC 2.5.1.18) (GST 4-4) (GSTM2-2) (Glutathione S-transferase Yb-2) (GST Yb2)	Gstm2		Rattus norvegicus (Rat)	218
B0BN47	Glutathione S-transferase (EC 2.5.1.18)	Gstm6 rCG_28718		Rattus norvegicus (Rat)	218
Q5BK56	Glutathione S-transferase (EC 2.5.1.18)	Gstm4 MGC108896 rCG_29014		Rattus norvegicus (Rat)	218
P04906	Glutathione S-transferase P (EC 2.5.1.18) (Chain 7) (GST 7-7) (GST class-pi)	Gstp1		Rattus norvegicus (Rat)	210
P08009	Glutathione S-transferase Yb-3 (EC 2.5.1.18) (Chain 4) (GST Yb3) (GST class-mu 3)	Gstm3		Rattus norvegicus (Rat)	218
4	Protein names	Gene names		Organism	Length
P08010	Glutathione S-transferase Mu 2 (EC 2.5.1.18) (GST 4-4) (GSTM2-2) (Glutathione S-transferase Yb-2) (GST Yb2)	Gstm2		Rattus norvegicus (Rat)	218
B0BN47	Glutathione S-transferase (EC 2.5.1.18)	Gstm6 rCG_28718		Rattus norvegicus (Rat)	218
Q5BK56	Glutathione S-transferase (EC 2.5.1.18)	Gstm4 MGC108896 rCG_29014		Rattus norvegicus (Rat)	218
P04906	Glutathione S-transferase P (EC 2.5.1.18) (Chain 7) (GST 7-7) (GST class-pi)	Gstp1		Rattus norvegicus (Rat)	210
P08009	Glutathione S-transferase Yb-3 (EC 2.5.1.18) (Chain 4) (GST Yb3) (GST class-mu 3)	Gstm3		Rattus norvegicus (Rat)	218
5	Protein names	Gene names		Organism	Length
P08010	Glutathione S-transferase Mu 2 (EC 2.5.1.18) (GST 4-4) (GSTM2-2) (Glutathione S-transferase Yb-2) (GST Yb2)	Gstm2		Rattus norvegicus (Rat)	218
B0BN47	Glutathione S-transferase (EC 2.5.1.18)	Gstm6 rCG_28718		Rattus norvegicus (Rat)	218
Q5BK56	Glutathione S-transferase (EC 2.5.1.18)	Gstm4 MGC108896 rCG_29014		Rattus norvegicus (Rat)	218
P04906	Glutathione S-transferase P (EC 2.5.1.18) (Chain 7) (GST 7-7) (GST class-pi)	Gstp1		Rattus norvegicus (Rat)	210
P08009	Glutathione S-transferase Yb-3 (EC 2.5.1.18) (Chain 4) (GST Yb3) (GST class-mu 3)	Gstm3		Rattus norvegicus (Rat)	218
6	Protein names	Gene names		Organism	Length
P18418	Calreticulin (CALBP) (CRP55) (Calcium-binding protein 3) (CABP3) (Calregulin) (Endoplasmic reticulum resident protein 60) (ERp60) (HACBP)	Calr		Rattus norvegicus (Rat)	416
Q63081	Protein disulfide-isomerase A6 (EC 5.3.4.1) (Calcium-binding protein 1) (CaBP1) (Protein disulfide isomerase P5) (Thioredoxin domain-containing protein 7)	Pdia6 Cabp1 Txndc7		Rattus norvegicus (Rat)	440
P06761	Endoplasmic reticulum chaperone BiP (EC 3.6.4.10) (78 kDa glucose-regulated protein) (GRP-78) (Binding-immunoglobulin protein) (BiP) (Heat shock protein 70 family protein 5) (HSP70 family protein 5) (Heat shock protein family A member 5) (Immunoglobulin heavy chain-binding protein) (Steroidogenesis-activator polypeptide)	Hspa5 Grp78		Rattus norvegicus (Rat)	654
Q63617	Hypoxia up-regulated protein 1 (150 kDa oxygen-regulated protein) (ORP-150)	Hyou1 Orp150		Rattus norvegicus (Rat)	999
A0A0G2JSZ5	Protein disulfide-isomerase A6 (RCG62282, isoform CRA_a)	Pdia6 rCG_62282		Rattus norvegicus (Rat)	445
P04785	Protein disulfide-isomerase (PDI) (EC 5.3.4.1) (Cellular thyroid hormone-binding protein) (Prolyl 4-hydroxylase subunit beta)	P4hb Pdia1		Rattus norvegicus (Rat)	509
