# Supplementary material for: Identification of potential molecular pathways involved in prostate carcinogenesis in offspring exposed to maternal malnutrition
Source: publisher site journal article supplement (doi:10.18632/aging.104093), 2020-10-13
Supplement: Supplementary file [file aging-v12i20-104093-supplementary-material-SD1.pdf]

SUPPLEMENTARY FIGURES

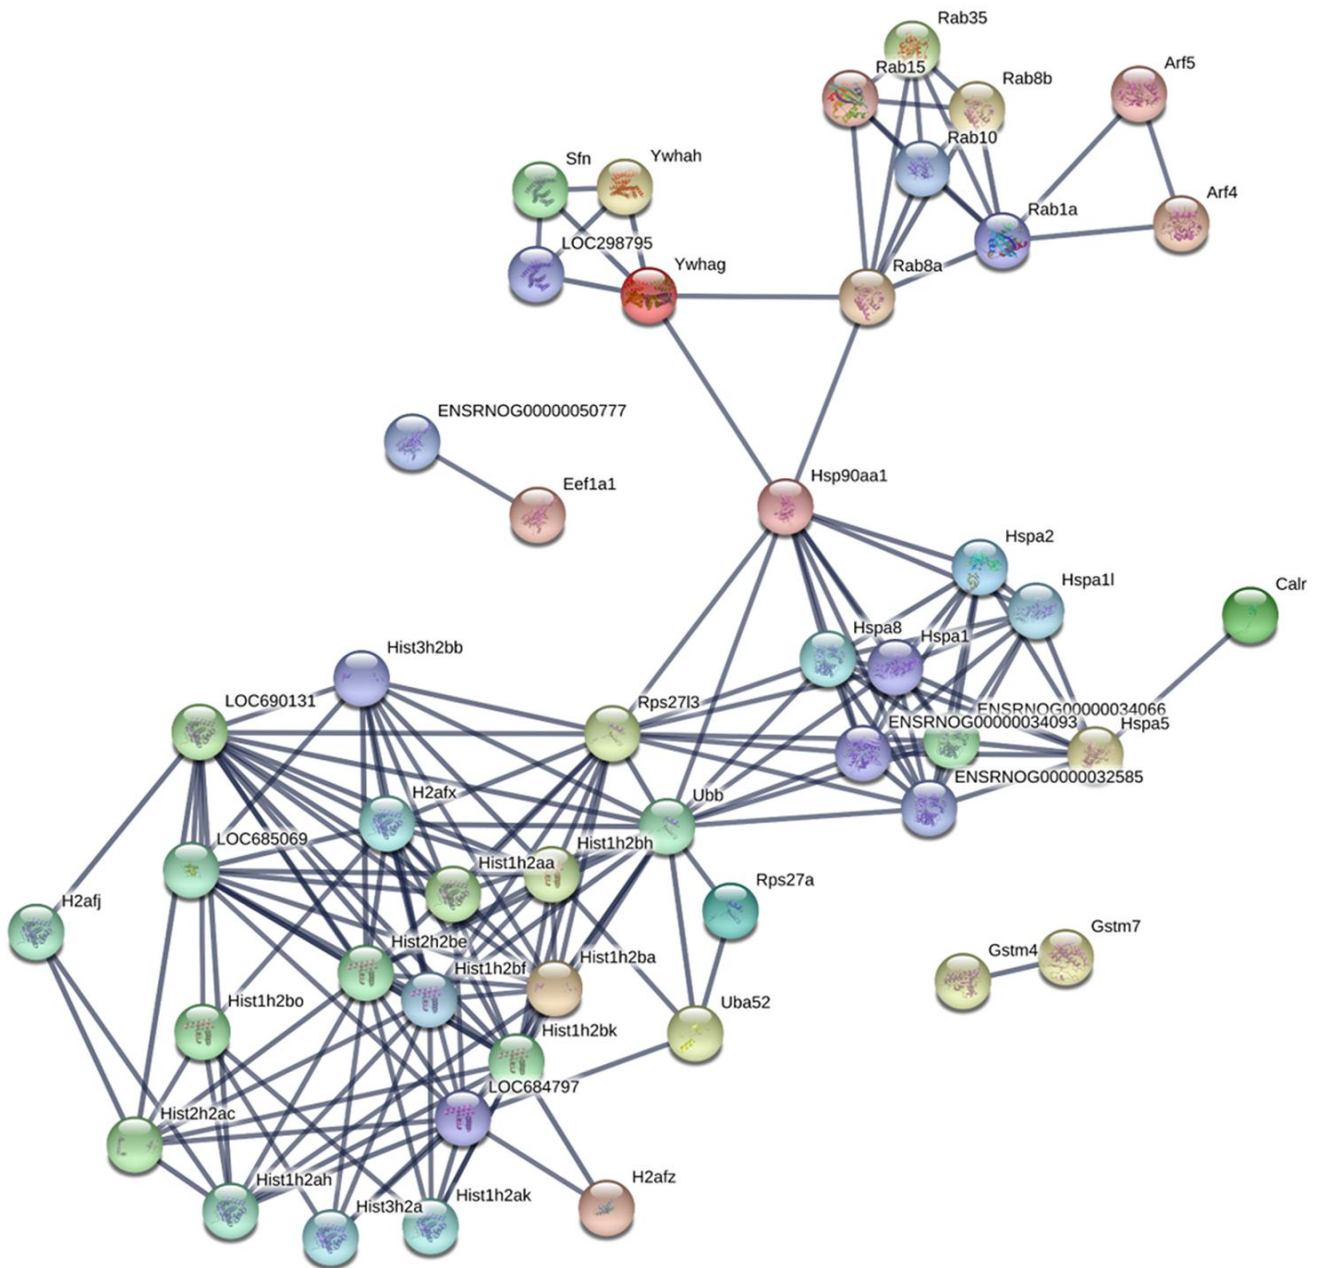

**Supplementary Figure 1. Protein-protein interaction network between upregulated proteins on PND 21.** Interactions of the identified proteins were mapped by searching the STRING database version 9.0 with a confidence cut-off of 0.7. In the resulting protein association network, proteins are presented as nodes that are connected by lines, whose thickness represents the confidence level (0.7-0.9).

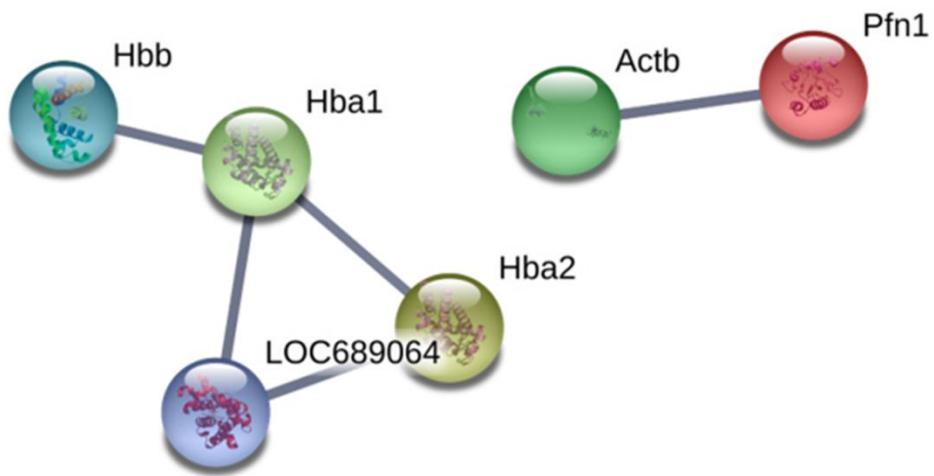

**Supplementary Figure 2. Protein-protein interaction network between downregulated proteins on PND 21.** Interactions of the identified proteins were mapped by searching the STRING database version 9.0 with a confidence cut-off of 0.7. In the resulting protein association network, proteins are presented as nodes that are connected by lines whose thickness represents the confidence level (0.7-0.9).

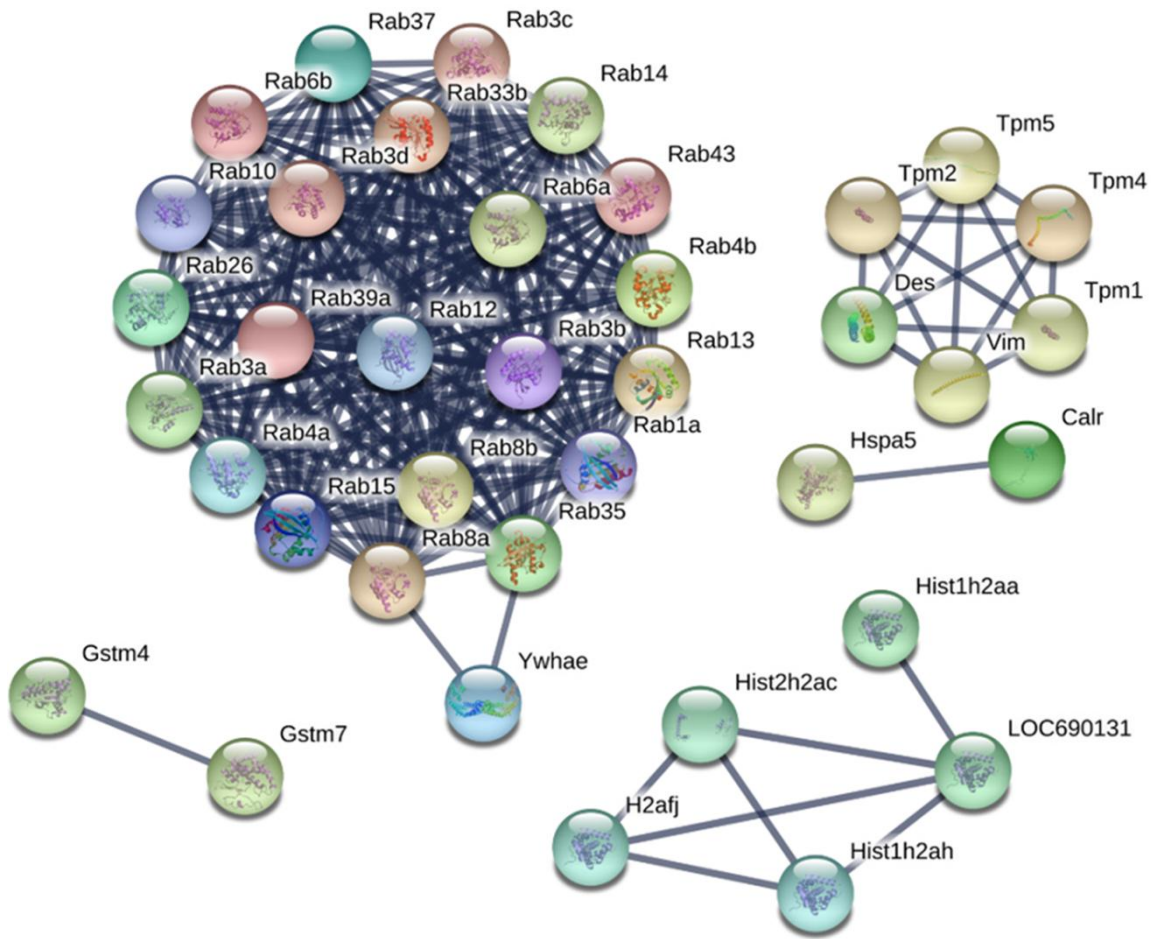

**Supplementary Figure 3. Protein-protein interaction network between upregulated proteins on PND 540.** Interactions of the identified proteins were mapped by searching the STRING database version 9.0 with a confidence cut-off of 0.7. In the resulting protein association network, proteins are presented as nodes that are connected by lines, whose thickness represents the confidence level (0.7-0.9).

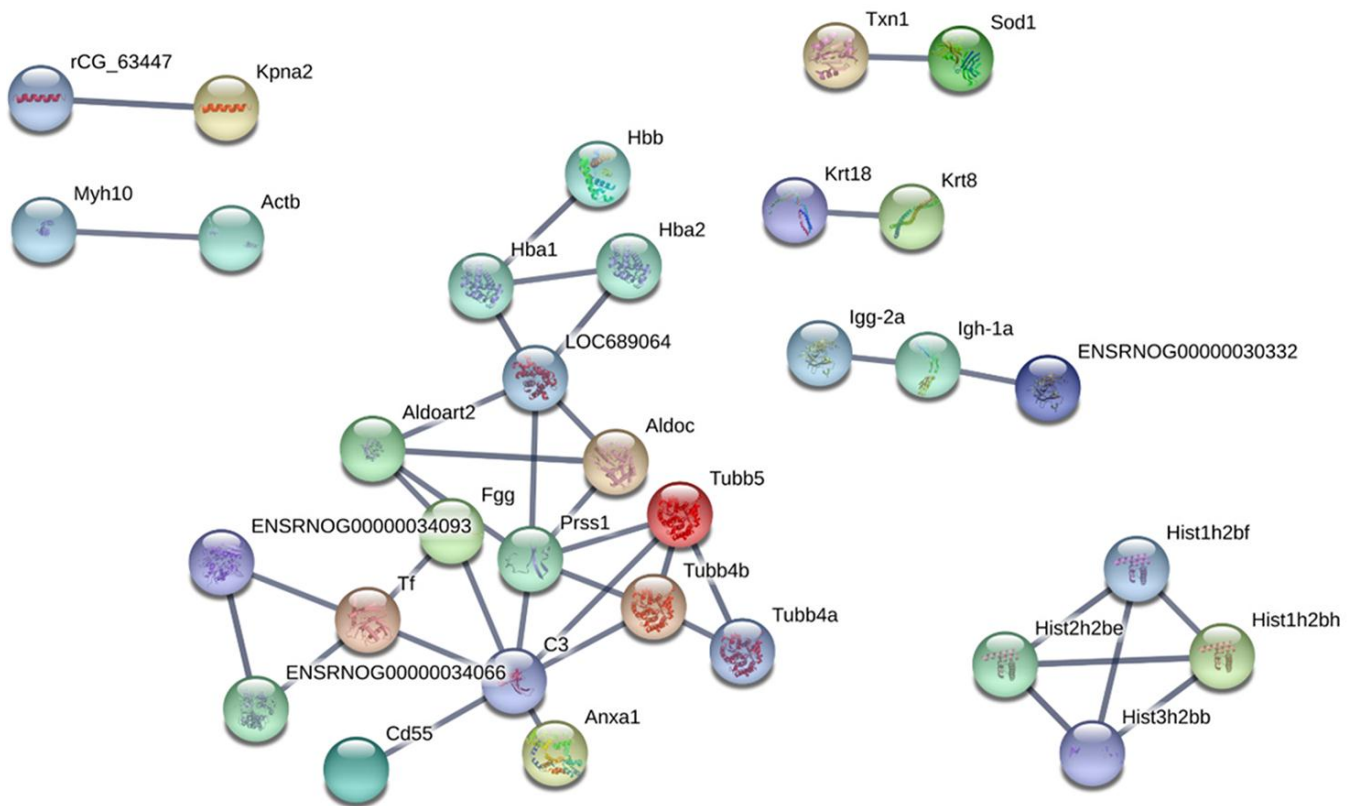

**Supplementary Figure 4. Protein-protein interaction network between downregulated proteins on PND 540.** Interactions of the identified proteins were mapped by searching the STRING database version 9.0 with a confidence cut-off of 0.7. In the resulting protein association network, proteins are presented as nodes that are connected by lines, whose thickness represents the confidence level (0.7-0.9).
