# Supplementary material for: Identification of potential molecular pathways involved in prostate carcinogenesis in offspring exposed to maternal malnutrition
Source: publisher site journal article supplement (doi:10.18632/aging.104093), 2020-10-13
Supplement: Supplementary file [file aging-v12i20-104093-supplementary-material-SD2.pdf]

## SUPPLEMENTARY TABLE

**Supplementary Table 1. Composition of the control (CTR) (AIN-76A) and low protein diet (LPD) (AIN-93).**

| <b>Ingredients</b>                          | <b>Normal (CTR) diet<br/>(17% of protein) g/Kg</b> | <b>Low protein diet<br/>(6% of protein) g/Kg</b> |
|---------------------------------------------|----------------------------------------------------|--------------------------------------------------|
| Casein (84% protein)                        | 202                                                | 71.5                                             |
| Starch                                      | 397                                                | 480                                              |
| Dextrin                                     | 130.5                                              | 159                                              |
| Sucrose                                     | 100                                                | 121                                              |
| L-cystine                                   | 3                                                  | 1                                                |
| Fiber of pH 101 or pH 102 (microcellulose)  | 50                                                 | 50                                               |
| Soyoil                                      | 70                                                 | 70                                               |
| Mixtureofvitamins AIN93G*                   | 10                                                 | 10**                                             |
| Mixtureofsalts AIN93G*                      | 35                                                 | 35***                                            |
| Choline hydrochloride or Choline bitartrate | 2.5                                                | 2.5                                              |

\* To know the detailed composition of the salt and vitamin mix, see REEVES et al., 1993. The diet is elaborated by the company PragSoluções (PragSoluções, Jaú, SP, Brazil).
